# Supplementary material
Source: publisher figshare collection journal article supplement (https://acs.figshare.com/ndownloader/files/17670575)
Supplement: Supplementary file 1 [file 17670575]

## Sheet: Necrosis Enhancers
Gene ID	Gene Accession	Gene Symbol	Drug 1	Drug 2	Drug 3	Control 4	Control 5	Control 6	Signed fold change	SAM Ratio	SAM q	ttest q	signed fold change X ttest q	SAM Ratio X ttest q	Description	GO Terms
10129	NM_023037	13CDNA73	90059	70346	73243	214578	213396	212792	1.51752	1.51752	0	0.00133359	0.00202375	-0.00202375	furry homolog (Drosophila)	cellular_component:spindle pole | cellular_component:cytoplasm | cellular_component:microtubule organizing center | molecular_function:binding
57532	NM_020772	182-FIP	169746	143731	116623	180124	183479	196797	1.05524	1.05524	26.6081	0.11461	0.120941	-0.120941	nuclear fragile X mental retardation protein interacting protein 2	molecular_function:RNA binding | molecular_function:protein binding | cellular_component:nucleus | cellular_component:cytoplasm | cellular_component:membrane | cellular_component:polysomal ribosome | molecular_function:poly(A) RNA binding | molecular_function:poly(A) RNA binding | molecular_function:poly(A) RNA binding | molecular_function:poly(A) RNA binding | molecular_function:poly(A) RNA bind…
27229	NM_014444	76P	90948	68792	58139	199967	201043	204173	1.62138	1.62138	0	0.00032192	0.000521954	-0.000521954	tubulin, gamma complex associated protein 4	biological_process:microtubule cytoskeleton organization | cellular_component:spindle pole | cellular_component:microtubule organizing center | biological_process:G2/M transition of mitotic cell cycle | molecular_function:structural constituent of cytoskeleton | cellular_component:centrosome | cellular_component:cytosol | biological_process:protein complex assembly | biological_process:microtubul…
346389	NM_182762	7A5	67455	77143	106713	216919	227369	231453	1.79277	1.79277	0	0.00954527	0.0171125	-0.0171125	metastasis associated in colon cancer 1	cellular_component:nucleus | cellular_component:cytoplasm | biological_process:transcription, DNA-templated | biological_process:regulation of transcription, DNA-templated | molecular_function:growth factor activity | biological_process:positive regulation of cell division
1	NM_130786	A1BG	216420	230572	165390	244228	236525	240485	1.17493	1.17493	2.9389	0.00696492	0.00818329	-0.00818329	alpha-1-B glycoprotein	molecular_function:molecular_function | cellular_component:extracellular region | cellular_component:extracellular space | biological_process:biological_process | cellular_component:extracellular vesicular exosome | cellular_component:blood microparticle | molecular_function:protein binding
54715	NM_018723	A2BP1	205020	223595	194807	282528	284013	288326	1.10125	1.10125	11.095	0.0287791	0.0316929	-0.0316929	RNA binding protein, fox-1 homolog (C. elegans) 1	molecular_function:nucleotide binding | molecular_function:nucleic acid binding | molecular_function:RNA binding | molecular_function:protein binding | cellular_component:nucleus | cellular_component:cytoplasm | cellular_component:trans-Golgi network | biological_process:mRNA processing | molecular_function:protein C-terminus binding | biological_process:RNA splicing | biological_process:regulati…
53947	NM_017436	A4GALT	77569	71402	81369	239473	228825	232079	1.40368	1.40368	0	0.000431941	0.000606308	-0.000606308	alpha 1,4-galactosyltransferase	cellular_component:Golgi stack | biological_process:protein glycosylation | biological_process:glycosphingolipid biosynthetic process | biological_process:plasma membrane organization | molecular_function:galactosyltransferase activity | cellular_component:integral component of Golgi membrane | molecular_function:lactosylceramide 4-alpha-galactosyltransferase activity | cellular_component:extrace…
13	NM_001086	AADAC	133859	113487	88521	256853	259491	247973	1.3424	1.3424	2.9389	0.081433	0.109316	-0.109316	arylacetamide deacetylase	molecular_function:catalytic activity | molecular_function:triglyceride lipase activity | cellular_component:endoplasmic reticulum membrane | biological_process:metabolic process | biological_process:positive regulation of triglyceride catabolic process | cellular_component:integral component of membrane | molecular_function:serine hydrolase activity | molecular_function:deacetylase activity | mo…
15	NM_001088	AANAT	46945	45313	50849	108298	106220	119813	1.64773	1.64773	0	0.00137316	0.00226259	-0.00226259	aralkylamine N-acetyltransferase	molecular_function:aralkylamine N-acetyltransferase activity | cellular_component:cytosol | biological_process:N-terminal protein amino acid acetylation | biological_process:circadian rhythm | biological_process:melatonin biosynthetic process | biological_process:cellular nitrogen compound metabolic process | biological_process:small molecule metabolic process | biological_process:indolalkylamine…
16	NM_001605	AARS	64606	101799	92329	240925	238060	231018	1.24009	1.24009	6.35904	0.0812456	0.100752	-0.100752	alanyl-tRNA synthetase	molecular_function:alanine-tRNA ligase activity | molecular_function:ATP binding | cellular_component:cytoplasm | cellular_component:cytosol | biological_process:tRNA aminoacylation for protein translation | biological_process:alanyl-tRNA aminoacylation | biological_process:tRNA processing | biological_process:cell death | molecular_function:zinc ion binding | biological_process:gene expression |…
132949	NM_181806	AASDH	249263	257763	261488	275124	270391	271081	1.14242	1.14242	2.9389	0.000669142	0.000764444	-0.000764444	aminoadipate-semialdehyde dehydrogenase	molecular_function:ATP binding | biological_process:fatty acid metabolic process | molecular_function:acid-thiol ligase activity | molecular_function:catalytic activity
60496	NM_015423	AASDHPPT	122483	138807	134451	253550	258195	252382	1.60196	1.60196	0	0.00158304	0.00253597	-0.00253597	aminoadipate-semialdehyde dehydrogenase-phosphopantetheinyl transferase	molecular_function:magnesium ion binding | biological_process:fatty acid biosynthetic process | molecular_function:holo-acyl-carrier-protein synthase activity | biological_process:macromolecule biosynthetic process | molecular_function:protein binding | cellular_component:cytosol | biological_process:vitamin metabolic process | biological_process:water-soluble vitamin metabolic process | biologic…
10157	NM_005763	AASS	15136	13925	11285	251035	242491	197096	1.27658	1.27658	2.9389	0.0529368	0.0675779	-0.0675779	aminoadipate-semialdehyde synthase	cellular_component:mitochondrion | cellular_component:mitochondrial matrix | biological_process:lysine catabolic process | biological_process:L-lysine catabolic process to acetyl-CoA via saccharopine | biological_process:cellular nitrogen compound metabolic process | cellular_component:intracellular membrane-bounded organelle | biological_process:small molecule metabolic process | molecular_funct…
26574	NM_012138	AATF	90475	67656	84436	225707	222503	220792	1.21075	1.21075	6.35904	0.0538936	0.0652519	-0.0652519	apoptosis antagonizing transcription factor	molecular_function:sequence-specific DNA binding transcription factor activity | molecular_function:protein binding | cellular_component:nucleus | cellular_component:nucleolus | cellular_component:cytoplasm | cellular_component:centrosome | cellular_component:focal adhesion | biological_process:cellular response to DNA damage stimulus | biological_process:negative regulation of superoxide anion g…
9625	NM_001080395	AATK	150536	96303	69138	264203	238508	249472	1.3855	1.3855	0.443512	0.0336181	0.0465778	-0.0465778	apoptosis-associated tyrosine kinase	molecular_function:ATP binding | molecular_function:protein serine/threonine kinase activity | molecular_function:protein binding | cellular_component:integral component of membrane | cellular_component:perinuclear region of cytoplasm | molecular_function:protein kinase activity | biological_process:protein phosphorylation | molecular_function:transferase activity, transferring phosphorus-contain…
18	NM_020686	ABAT	33024	60518	74189	171938	209441	200227	1.28166	1.28166	0.137128	0.00297403	0.00381169	-0.00381169	4-aminobutyrate aminotransferase	biological_process:gamma-aminobutyric acid metabolic process | molecular_function:pyridoxal phosphate binding | molecular_function:4-aminobutyrate transaminase activity | cellular_component:mitochondrion | cellular_component:mitochondrial matrix | biological_process:synaptic transmission | biological_process:neurotransmitter secretion | biological_process:gamma-aminobutyric acid catabolic process…
19	NM_005502	ABCA1	277638	63018	62731	249106	234616	229820	1.45989	1.45989	11.095	0.137712	0.201045	-0.201045	ATP-binding cassette, sub-family A (ABC1), member 1	molecular_function:receptor binding | molecular_function:protein binding | molecular_function:ATP binding | molecular_function:phospholipid binding | molecular_function:phospholipid transporter activity | cellular_component:plasma membrane | cellular_component:integral component of plasma membrane | biological_process:ATP catabolic process | biological_process:lysosome organization | biological_p…
10349	NM_080282	ABCA10	126948	106464	110536	244534	237259	242778	1.27903	1.27903	2.9389	0.0464544	0.0594165	-0.0594165	ATP-binding cassette, sub-family A (ABC1), member 10	molecular_function:ATP binding | biological_process:ATP catabolic process | biological_process:transport | cellular_component:integral component of membrane | molecular_function:ATPase activity
154664	NM_152701	ABCA13	65442	58382	53146	219394	222322	216256	1.02993	1.02993	33.6721	0.179731	0.18511	-0.18511	ATP-binding cassette, sub-family A (ABC1), member 13	molecular_function:ATP binding | biological_process:ATP catabolic process | biological_process:transport | cellular_component:integral component of membrane | molecular_function:ATPase activity
20	NM_001606	ABCA2	86347	88797	102046	188308	183994	187569	2.88663	2.88663	0	0.000108718	0.000313829	-0.000313829	ATP-binding cassette, sub-family A (ABC1), member 2	molecular_function:nucleotide binding | molecular_function:ATP binding | cellular_component:lysosome | cellular_component:lysosomal membrane | cellular_component:endosome | cellular_component:microtubule organizing center | biological_process:ATP catabolic process | biological_process:regulation of transcription from RNA polymerase II promoter | biological_process:lipid metabolic process | biolog…
21	NM_001089	ABCA3	55146	57499	63223	184913	196025	189539	1.11707	1.11707	16.2507	0.104395	0.116617	-0.116617	ATP-binding cassette, sub-family A (ABC1), member 3	molecular_function:transporter activity | molecular_function:ATP binding | cellular_component:extracellular space | cellular_component:plasma membrane | biological_process:ATP catabolic process | cellular_component:integral component of membrane | biological_process:response to drug | molecular_function:ATPase activity, coupled to transmembrane movement of substances | biological_process:transmem…
24	NM_000350	ABCA4	64756	59044	69678	261903	253517	246275	1.482	1.482	0.00681625	0.005587	0.00827996	-0.00827996	ATP-binding cassette, sub-family A (ABC1), member 4	molecular_function:ATP binding | biological_process:ATP catabolic process | biological_process:retinoid metabolic process | molecular_function:transporter activity | cellular_component:integral component of plasma membrane | biological_process:phototransduction, visible light | molecular_function:ATPase activity, coupled to transmembrane movement of substances | biological_process:transmembrane t…
23461	NM_018672	ABCA5	60249	52244	61658	192727	194842	188945	1.01314	1.01314	36.0237	0.214067	0.216879	-0.216879	ATP-binding cassette, sub-family A (ABC1), member 5	molecular_function:ATP binding | biological_process:ATP catabolic process | molecular_function:ATPase activity | cellular_component:Golgi membrane | cellular_component:lysosome | cellular_component:lysosomal membrane | cellular_component:late endosome | biological_process:negative regulation of macrophage derived foam cell differentiation | cellular_component:integral component of membrane | cell…
23460	NM_080284	ABCA6	34575	37533	41243	204768	191368	181168	1.33041	1.33041	0.443512	0.0173745	0.0231153	-0.0231153	ATP-binding cassette, sub-family A (ABC1), member 6	molecular_function:ATP binding | biological_process:ATP catabolic process | biological_process:transport | cellular_component:integral component of membrane | molecular_function:ATPase activity
10351	NM_007168	ABCA8	182715	137224	140223	254394	245673	251586	1.87826	1.87826	0	0.00395936	0.00743669	-0.00743669	ATP-binding cassette, sub-family A (ABC1), member 8	molecular_function:ATP binding | cellular_component:plasma membrane | biological_process:ATP catabolic process | biological_process:transport | cellular_component:integral component of membrane | molecular_function:ATPase activity, coupled to transmembrane movement of substances | biological_process:transmembrane transport | cellular_component:mitochondrial inner membrane | molecular_function:GTP…
10350	NM_080283	ABCA9	64128	66305	78715	196612	196762	184199	1.46787	1.46787	0.042001	0.0137906	0.0202428	-0.0202428	ATP-binding cassette, sub-family A (ABC1), member 9	molecular_function:ATP binding | biological_process:ATP catabolic process | biological_process:transport | cellular_component:integral component of membrane | molecular_function:ATPase activity | cellular_component:mitochondrion
5243	NM_000927	ABCB1	61897	71496	108098	225173	237988	236246	1.28841	1.28841	1.21626	0.0413234	0.0532415	-0.0532415	ATP-binding cassette, sub-family B (MDR/TAP), member 1	biological_process:G2/M transition of mitotic cell cycle | molecular_function:transporter activity | molecular_function:protein binding | molecular_function:ATP binding | cellular_component:plasma membrane | biological_process:ATP catabolic process | biological_process:drug transmembrane transport | molecular_function:xenobiotic-transporting ATPase activity | cellular_component:cell surface | cel…
5244	NM_018850	ABCB4	52997	49969	81961	221261	215199	230567	1.39222	1.39222	0.00681625	0.00470269	0.00654719	-0.00654719	ATP-binding cassette, sub-family B (MDR/TAP), member 4	molecular_function:ATP binding | cellular_component:plasma membrane | cellular_component:integral component of plasma membrane | biological_process:ATP catabolic process | biological_process:lipid metabolic process | biological_process:transport | biological_process:drug transmembrane transport | molecular_function:xenobiotic-transporting ATPase activity | cellular_component:integral component of…
340273	NM_178559	ABCB5	20509	28980	26585	284326	284000	291594	1.24854	1.24854	2.9389	0.044329	0.0553465	-0.0553465	ATP-binding cassette, sub-family B (MDR/TAP), member 5	biological_process:antigen processing and presentation of exogenous protein antigen via MHC class Ib, TAP-dependent | biological_process:antigen processing and presentation of endogenous peptide antigen via MHC class I via ER pathway, TAP-dependent | biological_process:antigen processing and presentation of endogenous peptide antigen via MHC class Ib via ER pathway, TAP-dependent | biological_pro…
10058	NM_005689	ABCB6	11005	12626	15731	222835	204662	223733	1.15191	1.15191	21.6065	0.155842	0.179516	-0.179516	ATP-binding cassette, sub-family B (MDR/TAP), member 6	molecular_function:ATP binding | cellular_component:mitochondrion | cellular_component:mitochondrial envelope | cellular_component:mitochondrial outer membrane | cellular_component:endosome | cellular_component:endoplasmic reticulum | cellular_component:Golgi apparatus | cellular_component:plasma membrane | biological_process:ATP catabolic process | biological_process:porphyrin-containing compoun…
22	NM_004299	ABCB7	73098	77222	81506	172692	164066	191631	3.02662	3.02662	0	0.0021845	0.00661165	-0.00661165	ATP-binding cassette, sub-family B (MDR/TAP), member 7	molecular_function:ATP binding | cellular_component:mitochondrion | cellular_component:mitochondrial inner membrane | biological_process:ATP catabolic process | biological_process:transport | biological_process:cellular iron ion homeostasis | molecular_function:heme transporter activity | cellular_component:integral component of membrane | molecular_function:ATPase activity, coupled to transmembr…
11194	NM_007188	ABCB8	112364	112307	116066	236357	229720	234072	1.74756	1.74756	0	0.000104545	0.000182699	-0.000182699	ATP-binding cassette, sub-family B (MDR/TAP), member 8	molecular_function:transporter activity | molecular_function:ATP binding | cellular_component:nucleus | cellular_component:nucleolus | cellular_component:mitochondrion | cellular_component:mitochondrial envelope | cellular_component:mitochondrial inner membrane | biological_process:ATP catabolic process | cellular_component:integral component of membrane | molecular_function:ATPase activity, coup…
23457	NM_019624	ABCB9	111416	114430	126880	246169	245267	256751	1.89883	1.89883	0	0.000420255	0.000797994	-0.000797994	ATP-binding cassette, sub-family B (MDR/TAP), member 9	molecular_function:ATP binding | cellular_component:integral component of membrane | molecular_function:ATPase activity, coupled to transmembrane movement of substances | biological_process:transmembrane transport | biological_process:ATP catabolic process | molecular_function:protein binding | cellular_component:lysosome | cellular_component:lysosomal membrane | biological_process:protein transp…
89845	NM_033450	ABCC10	86784	98703	106483	231814	265631	252792	1.81703	1.81703	0	0.0130921	0.0237888	-0.0237888	ATP-binding cassette, sub-family C (CFTR/MRP), member 10	molecular_function:ATP binding | biological_process:ATP catabolic process | cellular_component:integral component of membrane | molecular_function:ATPase activity, coupled to transmembrane movement of substances | biological_process:transmembrane transport | cellular_component:lysosomal membrane | cellular_component:plasma membrane
85320	NM_145186	ABCC11	113271	118511	105269	184218	190955	193672	2.41677	2.41677	0	0.000918788	0.0022205	-0.0022205	ATP-binding cassette, sub-family C (CFTR/MRP), member 11	molecular_function:ATP binding | cellular_component:plasma membrane | cellular_component:integral component of plasma membrane | biological_process:ATP catabolic process | molecular_function:organic anion transmembrane transporter activity | molecular_function:purine nucleotide transmembrane transporter activity | biological_process:organic anion transport | biological_process:purine nucleotide t…
94160	NM_033226	ABCC12	63818	52020	59914	230049	223046	218904	1.06325	1.06325	30.6466	0.189574	0.201566	-0.201566	ATP-binding cassette, sub-family C (CFTR/MRP), member 12	molecular_function:ATP binding | biological_process:ATP catabolic process | cellular_component:integral component of membrane | molecular_function:ATPase activity, coupled to transmembrane movement of substances | biological_process:transmembrane transport
1244	NM_000392	ABCC2	47012	54044	54820	232377	210905	232385	1.6209	1.6209	0	0.00276294	0.00447846	-0.00447846	ATP-binding cassette, sub-family C (CFTR/MRP), member 2	molecular_function:protein binding | molecular_function:ATP binding | cellular_component:plasma membrane | biological_process:ATP catabolic process | biological_process:transport | molecular_function:organic anion transmembrane transporter activity | cellular_component:apical plasma membrane | molecular_function:ATPase activity, coupled to transmembrane movement of substances | cellular_component…
8714	NM_003786	ABCC3	14972	11458	11226	162474	165534	173588	1.33772	1.33772	1.21626	0.0353105	0.0472355	-0.0472355	ATP-binding cassette, sub-family C (CFTR/MRP), member 3	molecular_function:ATP binding | cellular_component:plasma membrane | biological_process:ATP catabolic process | biological_process:transport | biological_process:bile acid metabolic process | molecular_function:organic anion transmembrane transporter activity | biological_process:bile acid and bile salt transport | molecular_function:ATPase activity, coupled to transmembrane movement of substanc…
368	NM_001171	ABCC6	53847	55326	58364	158947	146431	158706	2.38856	2.38856	0	0.00120416	0.0028762	-0.0028762	ATP-binding cassette, sub-family C (CFTR/MRP), member 6	molecular_function:transporter activity | cellular_component:plasma membrane | biological_process:visual perception | cellular_component:integral component of membrane | cellular_component:basolateral plasma membrane | biological_process:response to drug | molecular_function:ATPase activity, coupled to transmembrane movement of substances | biological_process:transmembrane transport | molecular_f…
215	NM_000033	ABCD1	26243	19945	23625	259823	245801	257564	1.81246	1.81246	0	0.000400668	0.000726196	-0.000726196	ATP-binding cassette, sub-family D (ALD), member 1	molecular_function:transporter activity | molecular_function:peroxisomal fatty-acyl-CoA transporter activity | molecular_function:protein binding | molecular_function:ATP binding | cellular_component:cytoplasm | cellular_component:peroxisome | cellular_component:peroxisomal membrane | cellular_component:integral component of peroxisomal membrane | cellular_component:cytosol | biological_process:A…
225	NM_005164	ABCD2	27890	227432	43855	191202	188724	208289	1.86938	1.86938	2.9389	0.115391	0.215708	-0.215708	ATP-binding cassette, sub-family D (ALD), member 2	biological_process:very long-chain fatty acid metabolic process | molecular_function:protein binding | molecular_function:ATP binding | cellular_component:peroxisome | cellular_component:peroxisomal membrane | cellular_component:cytosol | biological_process:ATP catabolic process | biological_process:fatty acid beta-oxidation | cellular_component:integral component of membrane | biological_process…
5825	NM_002858	ABCD3	98843	103839	67858	246872	234450	249210	1.20788	1.20788	6.35904	0.0780992	0.0943343	-0.0943343	ATP-binding cassette, sub-family D (ALD), member 3	molecular_function:ATP binding | biological_process:ATP catabolic process | cellular_component:integral component of membrane | molecular_function:ATPase activity, coupled to transmembrane movement of substances | cellular_component:intracellular membrane-bounded organelle | biological_process:transmembrane transport | molecular_function:protein binding | cellular_component:peroxisome | cellular_…
5826	NM_005050	ABCD4	17296	16045	14787	245657	252774	255972	1.26925	1.26925	0.137128	0.00631753	0.00801855	-0.00801855	ATP-binding cassette, sub-family D (ALD), member 4	molecular_function:ATP binding | cellular_component:peroxisome | cellular_component:peroxisomal membrane | biological_process:ATP catabolic process | biological_process:cobalamin metabolic process | cellular_component:integral component of membrane | molecular_function:ATPase activity, coupled to transmembrane movement of substances | cellular_component:ATP-binding cassette (ABC) transporter comp…
10061	NM_005692	ABCF2	115642	105702	131420	242593	257509	268805	1.65949	1.65949	0	0.00534173	0.00886457	-0.00886457	ATP-binding cassette, sub-family F (GCN20), member 2	molecular_function:ATP binding | biological_process:ATP catabolic process | molecular_function:ATPase activity | molecular_function:transporter activity | cellular_component:mitochondrial envelope | cellular_component:membrane | cellular_component:ATP-binding cassette (ABC) transporter complex | cellular_component:ATP-binding cassette (ABC) transporter complex | cellular_component:ATP-binding cas…
55324	NM_018358	ABCF3	53174	59363	70760	199803	223240	215401	1.30915	1.30915	0.00681625	0.000305456	0.000399888	-0.000399888	ATP-binding cassette, sub-family F (GCN20), member 3	molecular_function:ATP binding | biological_process:ATP catabolic process | cellular_component:membrane | molecular_function:ATPase activity | biological_process:defense response to virus | molecular_function:protein binding
9619	NM_207629	ABCG1	241347	233048	261777	272803	283918	284815	1.54401	1.54401	0	0.00184468	0.00284821	-0.00284821	ATP-binding cassette, sub-family G (WHITE), member 1	cellular_component:Golgi membrane | molecular_function:protein binding | molecular_function:ATP binding | molecular_function:phospholipid binding | molecular_function:phospholipid transporter activity | cellular_component:mitochondrion | cellular_component:endosome | cellular_component:endoplasmic reticulum membrane | cellular_component:Golgi apparatus | cellular_component:plasma membrane | cellu…
9429	NM_004827	ABCG2	30883	26494	21147	282498	277013	274235	1.40877	1.40877	0	0.00177359	0.00249859	-0.00249859	ATP-binding cassette, sub-family G (WHITE), member 2	molecular_function:transporter activity | molecular_function:protein binding | molecular_function:ATP binding | cellular_component:plasma membrane | biological_process:ATP catabolic process | biological_process:drug transmembrane transport | biological_process:cellular iron ion homeostasis | molecular_function:xenobiotic-transporting ATPase activity | molecular_function:heme transporter activity …
64137	NM_022169	ABCG4	89831	92896	95103	186636	157062	173560	2.30046	2.30046	0	0.00023771	0.000546843	-0.000546843	ATP-binding cassette, sub-family G (WHITE), member 4	molecular_function:ATP binding | biological_process:ATP catabolic process | molecular_function:ATPase activity | molecular_function:protein binding | cellular_component:plasma membrane | cellular_component:integral component of membrane | molecular_function:cholesterol transporter activity | biological_process:cholesterol efflux | molecular_function:protein homodimerization activity | molecular_f…
64240	NM_022436	ABCG5	37672	40092	43057	195040	168730	207430	1.21012	1.21012	2.9389	0.0438276	0.0530369	-0.0530369	ATP-binding cassette, sub-family G (WHITE), member 5	molecular_function:ATP binding | molecular_function:protein binding | cellular_component:plasma membrane | biological_process:ATP catabolic process | biological_process:excretion | biological_process:negative regulation of intestinal phytosterol absorption | biological_process:sterol transport | cellular_component:integral component of membrane | cellular_component:apical plasma membrane | biolog…
84696	NM_032604	ABHD1	29953	27366	25416	242764	250670	253452	2.72641	2.72641	0	0.000189174	0.000515766	-0.000515766	abhydrolase domain containing 1	molecular_function:molecular_function | biological_process:biological_process | biological_process:metabolic process | cellular_component:integral component of membrane | molecular_function:hydrolase activity
171586	NM_138340	ABHD3	128548	133361	143095	215366	209503	197891	2.47781	2.47781	0	4.37e-05	0.00010828	-0.00010828	abhydrolase domain containing 3	molecular_function:molecular_function | cellular_component:cellular_component | biological_process:biological_process | biological_process:metabolic process | cellular_component:integral component of membrane | molecular_function:hydrolase activity
63874	NM_022060	ABHD4	41053	44657	51319	155246	157696	161522	1.42438	1.42438	0.137128	0.016522	0.0235336	-0.0235336	abhydrolase domain containing 4	biological_process:lipid catabolic process | molecular_function:hydrolase activity | molecular_function:1-alkyl-2-acetylglycerophosphocholine esterase activity | biological_process:metabolic process
51099	NM_016006	ABHD5	20685	16906	16340	134528	125305	136589	1.9158	1.9158	0	0.00149323	0.00286073	-0.00286073	abhydrolase domain containing 5	biological_process:proteolysis | molecular_function:peptidase activity | molecular_function:1-acylglycerol-3-phosphate O-acyltransferase activity | cellular_component:nucleus | cellular_component:cytoplasm | cellular_component:lipid particle | cellular_component:cytosol | biological_process:fatty acid metabolic process | biological_process:phosphatidic acid biosynthetic process | biological_proce…
57406	NM_020676	ABHD6	102184	113924	104696	242516	246424	251174	1.70073	1.70073	0	0.00343972	0.00585002	-0.00585002	abhydrolase domain containing 6	biological_process:metabolic process | molecular_function:acylglycerol lipase activity | cellular_component:extracellular vesicular exosome | cellular_component:mitochondrion | biological_process:negative regulation of cell migration | cellular_component:alpha-amino-3-hydroxy-5-methyl-4-isoxazolepropionic acid selective glutamate receptor complex | biological_process:long term synaptic depression…
253152	NM_173567	ABHD7	149765	132851	152077	270242	257644	255940	1.86294	1.86294	0	0.000520967	0.000970529	-0.000970529	epoxide hydrolase 4	biological_process:metabolic process | cellular_component:integral component of membrane | molecular_function:hydrolase activity
79575	NM_024527	ABHD8	132598	113313	122840	234553	257146	253526	2.20154	2.20154	0	0.00161746	0.00356091	-0.00356091	abhydrolase domain containing 8	biological_process:metabolic process | molecular_function:hydrolase activity
10006	NM_001012751	ABI1	87722	74428	61206	219377	211994	222959	1.30767	1.30767	0.443512	0.0249771	0.0326617	-0.0326617	abl-interactor 1	molecular_function:protein binding | cellular_component:intracellular | cellular_component:nucleus | cellular_component:endoplasmic reticulum | cellular_component:cytosol | biological_process:cellular component movement | biological_process:transmembrane receptor protein tyrosine kinase signaling pathway | molecular_function:cytoskeletal protein binding | biological_process:actin polymerization o…
10152	NM_005759	ABI2	69321	70034	73435	259960	260269	227969	2.20544	2.20544	0	0.000225552	0.000497442	-0.000497442	abl-interactor 2	cellular_component:cytoplasm | biological_process:actin polymerization or depolymerization | molecular_function:protein binding | cellular_component:dendrite | biological_process:camera-type eye development | biological_process:cell migration | biological_process:dendrite development | biological_process:learning or memory | cellular_component:cell-cell adherens junction | molecular_function:DNA …
51225	NM_016428	ABI3	189649	183180	161536	255948	250207	258885	1.27397	1.27397	0.443512	0.00783746	0.00998466	-0.00998466	ABI family, member 3	molecular_function:protein binding | cellular_component:intracellular | cellular_component:cytoplasm | biological_process:cellular component movement | cellular_component:membrane | cellular_component:lamellipodium | biological_process:regulation of cell migration
3983	NM_006720	ABLIM1	66777	70918	61126	205796	205612	205300	1.47439	1.47439	0.042001	0.017017	0.0250896	-0.0250896	actin binding LIM protein 1	molecular_function:protein binding | cellular_component:cytoplasm | biological_process:cytoskeleton organization | biological_process:axon guidance | biological_process:visual perception | molecular_function:zinc ion binding | biological_process:organ morphogenesis | molecular_function:actin binding | biological_process:positive regulation of transcription from RNA polymerase II promoter | cellul…
22885	NM_014945	ABLIM3	74934	62850	67085	194454	189417	212047	1.41605	1.41605	0	0.00217428	0.00307889	-0.00307889	actin binding LIM protein family, member 3	molecular_function:actin binding | cellular_component:cytoplasm | biological_process:transcription, DNA-templated | biological_process:axon guidance | molecular_function:zinc ion binding | biological_process:actin cytoskeleton organization | biological_process:positive regulation of transcription from RNA polymerase II promoter
28	NM_020469	ABO	103386	106473	81362	277648	266782	263677	1.38267	1.38267	0.443512	0.0326225	0.0451061	-0.0451061	ABO blood group (transferase A, alpha 1-3-N-acetylgalactosaminyltransferase; transferase B, alpha 1-3-galactosyltransferase)	molecular_function:transferase activity, transferring hexosyl groups | biological_process:carbohydrate metabolic process | cellular_component:membrane | molecular_function:glycoprotein-fucosylgalactoside alpha-N-acetylgalactosaminyltransferase activity | molecular_function:fucosylgalactoside 3-alpha-galactosyltransferase activity | cellular_component:extracellular region | biological_process:prot…
29	NM_001092	ABR	144150	141008	98836	222936	228725	223424	1.16565	1.16565	2.9389	0.0141042	0.0164406	-0.0164406	active BCR-related	molecular_function:Rho guanyl-nucleotide exchange factor activity | molecular_function:GTPase activator activity | cellular_component:intracellular | biological_process:signal transduction | biological_process:positive regulation of Rho GTPase activity | molecular_function:protein binding | biological_process:regulation of Rho protein signal transduction | biological_process:intracellular signal …
30	NM_001607	ACAA1	94528	75139	81116	196476	192139	184550	1.50974	1.50974	0	0.000728551	0.00109992	-0.00109992	acetyl-CoA acyltransferase 1	biological_process:very long-chain fatty acid metabolic process | molecular_function:acetyl-CoA C-acyltransferase activity | molecular_function:protein binding | cellular_component:peroxisome | cellular_component:peroxisomal matrix | biological_process:fatty acid beta-oxidation | biological_process:bile acid metabolic process | cellular_component:membrane | molecular_function:palmitoyl-CoA oxidas…
10449	NM_006111	ACAA2	52199	60441	68450	162904	177614	179696	1.06681	1.06681	36.0237	0.225512	0.240578	-0.240578	acetyl-CoA acyltransferase 2	biological_process:metabolic process | molecular_function:transferase activity, transferring acyl groups other than amino-acyl groups | molecular_function:acetyl-CoA C-acyltransferase activity | molecular_function:protein binding | cellular_component:mitochondrion | biological_process:fatty acid metabolic process | biological_process:cholesterol biosynthetic process | molecular_function:poly(A) R…
31	NM_198834	ACACA	42035	41874	33677	250039	254889	250963	2.78097	2.78097	0	0.00385562	0.0107224	-0.0107224	acetyl-CoA carboxylase alpha	molecular_function:biotin carboxylase activity | molecular_function:ATP binding | molecular_function:acetyl-CoA carboxylase activity | molecular_function:protein binding | cellular_component:cytosol | biological_process:acetyl-CoA metabolic process | biological_process:energy reserve metabolic process | biological_process:fatty acid biosynthetic process | biological_process:vitamin metabolic proc…
32	NM_001093	ACACB	26163	28307	27198	254868	262110	269353	1.44114	1.44114	0.042001	0.0135247	0.019491	-0.019491	acetyl-CoA carboxylase beta	molecular_function:acetyl-CoA carboxylase activity | molecular_function:biotin carboxylase activity | molecular_function:protein binding | cellular_component:mitochondrial outer membrane | cellular_component:cytosol | biological_process:acetyl-CoA metabolic process | biological_process:energy reserve metabolic process | biological_process:vitamin metabolic process | biological_process:water-solub…
27034	NM_014384	ACAD8	45398	53728	71688	221182	212277	229431	1.28044	1.28044	0.443512	0.0114311	0.0146369	-0.0146369	acyl-CoA dehydrogenase family, member 8	molecular_function:acyl-CoA dehydrogenase activity | cellular_component:mitochondrial matrix | biological_process:transcription, DNA-templated | biological_process:regulation of transcription, DNA-templated | biological_process:valine catabolic process | biological_process:lipid metabolic process | biological_process:branched-chain amino acid catabolic process | biological_process:cellular nitrog…
28976	NM_014049	ACAD9	9792	12356	9324	243306	233899	201081	1.34726	1.34726	0.443512	0.0221303	0.0298154	-0.0298154	acyl-CoA dehydrogenase family, member 9	molecular_function:acyl-CoA dehydrogenase activity | cellular_component:mitochondrion | biological_process:oxidation-reduction process | cellular_component:nucleus | cellular_component:dendrite | molecular_function:flavin adenine dinucleotide binding | molecular_function:oxidoreductase activity, acting on the CH-CH group of donors | biological_process:metabolic process
33	NM_001608	ACADL	175888	184848	181475	250161	249109	240493	2.27009	2.27009	0	0.000172838	0.000392357	-0.000392357	acyl-CoA dehydrogenase, long chain	biological_process:temperature homeostasis | molecular_function:acyl-CoA dehydrogenase activity | molecular_function:long-chain-acyl-CoA dehydrogenase activity | cellular_component:cytoplasm | cellular_component:mitochondrion | cellular_component:mitochondrial matrix | biological_process:fatty acid beta-oxidation | molecular_function:palmitoyl-CoA oxidase activity | biological_process:carnitine m…
36	NM_001609	ACADSB	164340	133396	164920	221901	235475	241235	1.19917	1.19917	6.35904	0.0800292	0.0959683	-0.0959683	acyl-CoA dehydrogenase, short/branched chain	molecular_function:acyl-CoA dehydrogenase activity | cellular_component:mitochondrion | molecular_function:flavin adenine dinucleotide binding | biological_process:oxidation-reduction process | molecular_function:oxidoreductase activity, acting on the CH-CH group of donors | biological_process:metabolic process | cellular_component:mitochondrial matrix | biological_process:fatty acid metabolic pr…
37	NM_001033859	ACADVL	29905	31748	18743	274868	254812	267642	1.89204	1.89204	0	0.0016547	0.00313076	-0.00313076	acyl-CoA dehydrogenase, very long chain	biological_process:temperature homeostasis | molecular_function:acyl-CoA dehydrogenase activity | molecular_function:long-chain-acyl-CoA dehydrogenase activity | cellular_component:nucleus | cellular_component:nucleolus | cellular_component:cytoplasm | cellular_component:mitochondrion | cellular_component:mitochondrial inner membrane | cellular_component:mitochondrial matrix | biological_process:…
55902	NM_018677	ACAS2	11501	16895	14290	259407	254725	267468	1.33086	1.33086	0.443512	0.0260819	0.0347114	-0.0347114	acyl-CoA synthetase short-chain family member 2	molecular_function:catalytic activity | biological_process:metabolic process | molecular_function:acetate-CoA ligase activity | molecular_function:ATP binding | cellular_component:nucleus | cellular_component:cytoplasm | cellular_component:cytosol | biological_process:ethanol oxidation | biological_process:xenobiotic metabolic process | biological_process:lipid biosynthetic process | molecular_fu…
38	NM_000019	ACAT1	50540	53744	64706	202640	225377	211592	1.1467	1.1467	6.35904	0.0157896	0.0181059	-0.0181059	acetyl-CoA acetyltransferase 1	biological_process:metabolic process | molecular_function:acetyl-CoA C-acetyltransferase activity | cellular_component:mitochondrion | cellular_component:mitochondrial matrix | biological_process:branched-chain amino acid catabolic process | biological_process:cellular nitrogen compound metabolic process | biological_process:cellular lipid metabolic process | biological_process:small molecule met…
39	NM_005891	ACAT2	56174	50263	83988	199537	194949	217226	1.50497	1.50497	0	0.00103565	0.00155863	-0.00155863	acetyl-CoA acetyltransferase 2	molecular_function:acetyl-CoA C-acetyltransferase activity | cellular_component:nucleus | cellular_component:nucleolus | cellular_component:cytoplasm | biological_process:lipid metabolic process | molecular_function:transferase activity, transferring acyl groups other than amino-acyl groups | molecular_function:catalytic activity
23597	NM_001033583	ACATE2	23516	18654	24009	190222	168589	183562	2.99418	2.99418	0	0.00138247	0.00413936	-0.00413936	acyl-CoA thioesterase 9	molecular_function:acetyl-CoA hydrolase activity | cellular_component:mitochondrion | biological_process:acyl-CoA metabolic process
64746	NM_022735	ACBD3	124689	70708	60291	232444	242409	226691	1.14352	1.14352	11.095	0.0814656	0.0931576	-0.0931576	acyl-CoA binding domain containing 3	molecular_function:fatty-acyl-CoA binding | cellular_component:Golgi membrane | molecular_function:protein binding | cellular_component:mitochondrion | cellular_component:Golgi apparatus | biological_process:steroid biosynthetic process | biological_process:transport | cellular_component:integral component of membrane
79777	NM_024722	ACBD4	225028	218129	165368	293901	276874	283668	1.38553	1.38553	0.00681625	0.0025811	0.00357619	-0.00357619	acyl-CoA binding domain containing 4	molecular_function:fatty-acyl-CoA binding | molecular_function:lipid binding
40	NM_001094	ACCN1	139801	117486	108065	179025	177310	173326	1.27167	1.27167	1.21626	0.0225269	0.0286468	-0.0286468	acid-sensing (proton-gated) ion channel 2	molecular_function:protein binding | cellular_component:plasma membrane | biological_process:synaptic transmission | biological_process:central nervous system development | biological_process:peripheral nervous system development | biological_process:regulation of gene expression | biological_process:monovalent inorganic cation transport | biological_process:regulation of blood coagulation | biol…
41	NM_001095	ACCN2	122540	139065	117286	177080	169163	183747	1.17219	1.17219	2.9389	0.00998643	0.011706	-0.011706	acid-sensing (proton-gated) ion channel 1	molecular_function:protein binding | cellular_component:plasma membrane | cellular_component:integral component of plasma membrane | biological_process:transport | biological_process:sodium ion transport | biological_process:signal transduction | biological_process:response to pH | molecular_function:ligand-gated sodium channel activity | biological_process:ion transmembrane transport | biologica…
65057	NM_001082487	ACD	122748	97483	105278	225466	212538	203093	1.92569	1.92569	0	0.000397147	0.000764781	-0.000764781	adrenocortical dysplasia homolog (mouse)	biological_process:telomere maintenance | cellular_component:chromosome, telomeric region | cellular_component:nuclear telomere cap complex | molecular_function:DNA binding | molecular_function:protein binding | cellular_component:nucleoplasm | biological_process:intracellular protein transport | biological_process:telomere capping | biological_process:protection from non-homologous end joining a…
59272	NM_021804	ACE2	38846	30986	32977	207349	232810	234770	1.62711	1.62711	0	0.000340087	0.000553359	-0.000553359	angiotensin I converting enzyme 2	molecular_function:virus receptor activity | biological_process:regulation of cytokine production | molecular_function:glycoprotein binding | biological_process:angiotensin maturation | biological_process:angiotensin catabolic process in blood | biological_process:angiotensin-mediated drinking behavior | biological_process:regulation of systemic arterial blood pressure by renin-angiotensin | mole…
43	NM_000665	ACHE	75850	79130	84457	216186	215071	205275	1.11913	1.11913	11.095	0.0498022	0.0557352	-0.0557352	acetylcholinesterase (Yt blood group)	biological_process:acetylcholine catabolic process in synaptic cleft | molecular_function:beta-amyloid binding | biological_process:osteoblast development | molecular_function:acetylcholinesterase activity | molecular_function:protein binding | molecular_function:collagen binding | cellular_component:extracellular region | cellular_component:basal lamina | cellular_component:extracellular space |…
22985	NM_014977	ACIN1	30847	34839	40237	180834	199408	175894	1.49967	1.49967	0	0.003636	0.00545279	-0.00545279	apoptotic chromatin condensation inducer 1	molecular_function:nucleotide binding | molecular_function:nucleic acid binding | cellular_component:nucleus | cellular_component:cytoplasm | cellular_component:plasma membrane | molecular_function:protein binding | cellular_component:cytosol | biological_process:ATP catabolic process | biological_process:mRNA processing | biological_process:apoptotic process | biological_process:cellular compone…
48	NM_002197	ACO1	40594	44942	58214	139430	118513	145581	1.75032	1.75032	0	0.00157736	0.00276089	-0.00276089	aconitase 1, soluble	cellular_component:cytoplasm | cellular_component:mitochondrion | biological_process:metabolic process | molecular_function:4 iron, 4 sulfur cluster binding | molecular_function:RNA binding | molecular_function:aconitate hydratase activity | molecular_function:protein binding | cellular_component:endoplasmic reticulum | cellular_component:Golgi apparatus | cellular_component:cytosol | biological_…
50	NM_001098	ACO2	13214	11197	8678	133015	145481	135217	1.12483	1.12483	26.6081	0.172824	0.194398	-0.194398	aconitase 2, mitochondrial	molecular_function:aconitate hydratase activity | molecular_function:iron ion binding | cellular_component:nucleus | cellular_component:mitochondrion | cellular_component:mitochondrial matrix | biological_process:generation of precursor metabolites and energy | biological_process:tricarboxylic acid cycle | biological_process:citrate metabolic process | biological_process:cell death | biological_p…
641371	NM_001037161	ACOT1	75206	59450	84894	243296	248254	243275	1.59494	1.59494	0	0.00649056	0.0103521	-0.0103521	acyl-CoA thioesterase 1	biological_process:very long-chain fatty acid metabolic process | cellular_component:cytosol | biological_process:acyl-CoA metabolic process | molecular_function:palmitoyl-CoA hydrolase activity | molecular_function:acyl-CoA hydrolase activity | molecular_function:thiolester hydrolase activity
51	NM_007292	ACOX1	104994	137810	159520	300681	275490	277007	1.6116	1.6116	0	0.00903806	0.0145657	-0.0145657	acyl-CoA oxidase 1, palmitoyl	biological_process:very long-chain fatty acid metabolic process | molecular_function:acyl-CoA dehydrogenase activity | molecular_function:acyl-CoA oxidase activity | molecular_function:receptor binding | cellular_component:peroxisome | cellular_component:peroxisomal matrix | biological_process:generation of precursor metabolites and energy | biological_process:lipid metabolic process | biological…
8310	NM_001101667	ACOX3	42240	41578	40232	282443	286626	280672	3.17238	3.17238	0	0.00124732	0.00395699	-0.00395699	acyl-CoA oxidase 3, pristanoyl	molecular_function:acyl-CoA dehydrogenase activity | biological_process:oxidation-reduction process | molecular_function:receptor binding | cellular_component:peroxisome | cellular_component:peroxisomal matrix | cellular_component:membrane | molecular_function:pristanoyl-CoA oxidase activity | biological_process:fatty acid beta-oxidation using acyl-CoA oxidase | biological_process:cellular lipid …
55289	NM_001105516	ACOXL	43553	39698	50180	190266	193159	211282	1.11846	1.11846	21.6065	0.135524	0.151578	-0.151578	acyl-CoA oxidase-like	molecular_function:molecular_function | molecular_function:acyl-CoA dehydrogenase activity | molecular_function:acyl-CoA oxidase activity | cellular_component:cellular_component | cellular_component:peroxisome | biological_process:fatty acid beta-oxidation | biological_process:oxidation-reduction process | molecular_function:oxidoreductase activity, acting on the CH-CH group of donors | biologica…
52	NM_001040649	ACP1	53742	60275	59872	162001	153863	177190	1.59626	1.59626	0.042001	0.0191865	0.0306266	-0.0306266	acid phosphatase 1, soluble	molecular_function:acid phosphatase activity | molecular_function:non-membrane spanning protein tyrosine phosphatase activity | molecular_function:protein binding | cellular_component:cytoplasm | cellular_component:cytoplasmic side of plasma membrane | biological_process:peptidyl-tyrosine dephosphorylation | cellular_component:extracellular vesicular exosome
54	NM_001611	ACP5	88687	75114	55064	179620	177519	191217	1.8004	1.8004	0	0.000109003	0.000196249	-0.000196249	acid phosphatase 5, tartrate resistant	molecular_function:acid phosphatase activity | cellular_component:lysosome | cellular_component:cytosol | biological_process:vitamin metabolic process | biological_process:water-soluble vitamin metabolic process | biological_process:riboflavin metabolic process | molecular_function:ferrous iron binding | molecular_function:ferric iron binding | cellular_component:integral component of membrane | …
55	NM_001099	ACPP	47759	46109	33606	197057	201343	202611	1.10427	1.10427	21.6065	0.138672	0.153132	-0.153132	acid phosphatase, prostate	molecular_function:acid phosphatase activity | molecular_function:protein binding | cellular_component:extracellular space | cellular_component:intracellular | cellular_component:nucleus | cellular_component:lysosomal membrane | cellular_component:plasma membrane | biological_process:thiamine metabolic process | molecular_function:5'-nucleotidase activity | cellular_component:vesicle membrane | b…
93650	NM_033068	ACPT	76112	57154	59013	214853	221888	233754	1.30737	1.30737	0.443512	0.0178383	0.0233214	-0.0233214	acid phosphatase, testicular	molecular_function:acid phosphatase activity | cellular_component:integral component of membrane | biological_process:dephosphorylation
49	NM_001097	ACR	30134	28693	27953	172612	178623	179167	1.73014	1.73014	0	0.00129166	0.00223474	-0.00223474	acrosin	biological_process:acrosome matrix dispersal | molecular_function:DNA binding | molecular_function:amidase activity | molecular_function:serine-type endopeptidase activity | molecular_function:copper ion binding | molecular_function:protein binding | molecular_function:mannose binding | cellular_component:extracellular region | cellular_component:nucleus | biological_process:activation of adenyla…
84519	NM_032489	ACRBP	138985	114232	106912	203019	195200	220634	1.37651	1.37651	0	0.00119333	0.00164263	-0.00164263	acrosin binding protein	cellular_component:acrosomal vesicle | molecular_function:molecular_function | cellular_component:extracellular region | cellular_component:nucleus | biological_process:biological_process
2180	NM_001995	ACSL1	11363	18982	18872	264894	276008	285318	1.43057	1.43057	0.443512	0.0488853	0.0699338	-0.0699338	acyl-CoA synthetase long-chain family member 1	molecular_function:catalytic activity | biological_process:metabolic process | biological_process:long-chain fatty acid metabolic process | molecular_function:long-chain fatty acid-CoA ligase activity | molecular_function:ATP binding | cellular_component:mitochondrion | cellular_component:mitochondrial outer membrane | cellular_component:peroxisomal membrane | cellular_component:endoplasmic retic…
2181	NM_004457	ACSL3	20898	20668	14524	213957	178455	216647	1.7556	1.7556	0	0.00461562	0.00810317	-0.00810317	acyl-CoA synthetase long-chain family member 3	molecular_function:long-chain fatty acid-CoA ligase activity | molecular_function:ATP binding | cellular_component:mitochondrial outer membrane | cellular_component:peroxisomal membrane | cellular_component:endoplasmic reticulum | cellular_component:endoplasmic reticulum membrane | cellular_component:Golgi apparatus | cellular_component:lipid particle | cellular_component:integral component of me…
51703	NM_016234	ACSL5	64601	61010	85491	193380	172995	196197	2.14775	2.14775	0	0.000252438	0.000542173	-0.000542173	acyl-CoA synthetase long-chain family member 5	biological_process:long-chain fatty acid metabolic process | molecular_function:long-chain fatty acid-CoA ligase activity | molecular_function:ATP binding | cellular_component:nucleus | cellular_component:nucleolus | cellular_component:mitochondrion | cellular_component:mitochondrial outer membrane | cellular_component:endoplasmic reticulum | cellular_component:endoplasmic reticulum membrane | ce…
6296	NM_202000	ACSM3	55830	60131	65510	232433	230423	228329	1.53162	1.53162	0	0.0015849	0.00242747	-0.00242747	acyl-CoA synthetase medium-chain family member 3	molecular_function:molecular_function | molecular_function:ATP binding | cellular_component:cellular_component | cellular_component:mitochondrial matrix | biological_process:regulation of blood pressure | biological_process:cholesterol homeostasis | molecular_function:metal ion binding | molecular_function:butyrate-CoA ligase activity | molecular_function:catalytic activity | biological_process:m…
60	NM_001101	ACTB	242695	226754	182077	284028	285782	281928	2.30114	2.30114	0	0.000571101	0.00131418	-0.00131418	actin, gamma 1	biological_process:retina homeostasis | molecular_function:structural constituent of cytoskeleton | molecular_function:protein binding | molecular_function:ATP binding | cellular_component:extracellular space | cellular_component:nucleus | cellular_component:cytosol | biological_process:cellular component movement | biological_process:axon guidance | cellular_component:membrane | biological_proce…
71	NM_001614	ACTG1	260741	246996	207649	306319	307726	288656	1.24697	1.24697	1.21626	0.0230042	0.0286854	-0.0286854	actin, gamma 1	biological_process:retina homeostasis | molecular_function:structural constituent of cytoskeleton | molecular_function:protein binding | molecular_function:ATP binding | cellular_component:extracellular space | cellular_component:nucleus | cellular_component:cytosol | biological_process:cellular component movement | biological_process:axon guidance | cellular_component:membrane | biological_proce…
10880	NM_006686	ACTL7B	70638	62873	55764	172290	180781	168896	1.6537	1.6537	0	0.00160687	0.00265727	-0.00265727	actin-like 7B	molecular_function:structural constituent of cytoskeleton | cellular_component:actin cytoskeleton | cellular_component:cytoplasm
87	NM_001102	ACTN1	12586	10219	13082	234859	240970	241998	1.08046	1.08046	21.6065	0.127328	0.137573	-0.137573	actinin, alpha 1	biological_process:actin crosslink formation | cellular_component:ruffle | biological_process:platelet degranulation | molecular_function:double-stranded RNA binding | molecular_function:integrin binding | molecular_function:calcium ion binding | molecular_function:protein binding | cellular_component:extracellular region | cellular_component:extracellular space | cellular_component:cytoplasm | c…
81	NM_004924	ACTN4	192981	170929	159888	219391	214043	219397	1.05834	1.05834	21.6065	0.0621818	0.0658095	-0.0658095	actinin, alpha 4	molecular_function:nucleoside binding | biological_process:platelet degranulation | molecular_function:actin binding | molecular_function:integrin binding | molecular_function:calcium ion binding | molecular_function:protein binding | cellular_component:extracellular region | cellular_component:extracellular space | cellular_component:nucleus | cellular_component:cytoplasm | biological_process:bl…
79913	NM_024855	ACTR5	84354	90919	97003	247682	255707	261782	2.03283	2.03283	0	0.00204458	0.00415627	-0.00415627	ARP5 actin-related protein 5 homolog (yeast)	molecular_function:protein binding | cellular_component:nucleus | cellular_component:cytoplasm | biological_process:double-strand break repair | biological_process:DNA recombination | biological_process:transcription, DNA-templated | biological_process:regulation of transcription, DNA-templated | cellular_component:Ino80 complex | biological_process:UV-damage excision repair
90	NM_001105	ACVR1	222364	230284	210421	264874	256429	258178	1.08437	1.08437	21.6065	0.132266	0.143426	-0.143426	activin A receptor, type I	molecular_function:ATP binding | molecular_function:receptor signaling protein serine/threonine kinase activity | biological_process:transmembrane receptor protein serine/threonine kinase signaling pathway | biological_process:signal transduction by phosphorylation | biological_process:G1/S transition of mitotic cell cycle | biological_process:embryonic heart tube morphogenesis | biological_proce…
95	NM_000666	ACY1	26799	27327	31456	227111	222508	238230	1.69266	1.69266	0	0.00140643	0.00238062	-0.00238062	aminoacylase 1	molecular_function:aminoacylase activity | cellular_component:cytoplasm | biological_process:proteolysis | biological_process:cellular amino acid metabolic process | molecular_function:metallopeptidase activity | molecular_function:hydrolase activity | cellular_component:cytosol | molecular_function:metal ion binding | cellular_component:extracellular vesicular exosome
91703	NM_080658	ACY-3	189084	172634	177574	245354	243236	239909	2.28926	2.28926	0	0.000789785	0.00180802	-0.00180802	aspartoacylase (aminocyclase) 3	biological_process:metabolic process | molecular_function:hydrolase activity, acting on ester bonds | molecular_function:aminoacylase activity | cellular_component:cytoplasm | biological_process:viral process | cellular_component:apical plasma membrane | molecular_function:metal ion binding | cellular_component:extracellular vesicular exosome | molecular_function:hydrolase activity, acting on car…
97	NM_001107	ACYP1	84223	81840	73434	215227	189030	202592	1.81583	1.81583	0	0.00167875	0.00304832	-0.00304832	acylphosphatase 1, erythrocyte (common) type	molecular_function:acylphosphatase activity | biological_process:phosphate-containing compound metabolic process | cellular_component:extracellular vesicular exosome
28989	NM_014064	AD-003	77310	72011	64090	131686	133886	133913	1.95468	1.95468	0	0.000547356	0.00106991	-0.00106991	N-terminal Xaa-Pro-Lys N-methyltransferase 1	molecular_function:methyltransferase activity | cellular_component:nucleus | cellular_component:cytoplasm | biological_process:spindle organization | biological_process:chromosome segregation | molecular_function:protein methyltransferase activity | biological_process:N-terminal peptidyl-proline dimethylation | biological_process:N-terminal peptidyl-serine dimethylation | biological_process:N-ter…
55830	NM_152932	AD-017	86214	71945	94265	238953	230431	238203	1.9131	1.9131	0	0.00147591	0.00282356	-0.00282356	glycosyltransferase 8 domain containing 1	biological_process:metabolic process | molecular_function:transferase activity, transferring glycosyl groups | cellular_component:membrane | cellular_component:integral component of membrane
100	NM_000022	ADA	41535	45909	48205	178753	197038	193045	1.03874	1.03874	26.6081	0.0550176	0.0571488	-0.0571488	adenosine deaminase	biological_process:response to hypoxia | molecular_function:adenosine deaminase activity | molecular_function:protein binding | cellular_component:cytoplasm | cellular_component:lysosome | cellular_component:cytosol | cellular_component:plasma membrane | biological_process:purine nucleobase metabolic process | biological_process:adenosine catabolic process | biological_process:cell adhesion | mol…
8038	NM_021641	ADAM12	15334	20176	20161	236199	221314	216073	1.13838	1.13838	6.35904	0.0366697	0.0417442	-0.0417442	ADAM metallopeptidase domain 12	molecular_function:metalloendopeptidase activity | molecular_function:protein binding | cellular_component:extracellular region | cellular_component:plasma membrane | biological_process:proteolysis | biological_process:cell adhesion | biological_process:epidermal growth factor receptor signaling pathway | biological_process:myoblast fusion | molecular_function:metallopeptidase activity | molecula…
8751	NM_207191	ADAM15	26507	29687	24730	251943	234322	231873	1.79626	1.79626	0	0.00395192	0.00709869	-0.00709869	ADAM metallopeptidase domain 15	biological_process:angiogenesis | cellular_component:acrosomal vesicle | molecular_function:metalloendopeptidase activity | molecular_function:protein binding | cellular_component:plasma membrane | cellular_component:adherens junction | biological_process:proteolysis | biological_process:cell-matrix adhesion | molecular_function:metallopeptidase activity | molecular_function:zinc ion binding | ce…
6868	NM_003183	ADAM17	30370	28016	20257	227356	224960	230120	1.37599	1.37599	0.443512	0.0353819	0.0486852	-0.0486852	ADAM metallopeptidase domain 17	biological_process:response to hypoxia | biological_process:positive regulation of protein phosphorylation | biological_process:neutrophil mediated immunity | biological_process:germinal center formation | biological_process:positive regulation of leukocyte chemotaxis | molecular_function:metalloendopeptidase activity | molecular_function:Notch binding | molecular_function:interleukin-6 receptor …
8728	NM_023038	ADAM19	19719	16414	21532	241944	218168	212257	1.3193	1.3193	6.35904	0.0874314	0.115348	-0.115348	ADAM metallopeptidase domain 19	molecular_function:metalloendopeptidase activity | biological_process:proteolysis | molecular_function:zinc ion binding | molecular_function:protein binding | cellular_component:integral component of membrane | molecular_function:SH3 domain binding | biological_process:heart development | biological_process:membrane protein ectodomain proteolysis
2515	NM_001464	ADAM2	36032	31409	38233	183202	192340	206894	2.19385	2.19385	0	0.000132988	0.000291756	-0.000291756	ADAM metallopeptidase domain 2	molecular_function:metalloendopeptidase activity | molecular_function:integrin binding | cellular_component:plasma membrane | cellular_component:integral component of plasma membrane | biological_process:proteolysis | biological_process:single fertilization | biological_process:binding of sperm to zona pellucida | biological_process:fusion of sperm to egg plasma membrane | molecular_function:meta…
8748	NM_003814	ADAM20	19987	18846	19991	262983	253767	251164	1.22099	1.22099	0.443512	0.00294553	0.00359647	-0.00359647	ADAM metallopeptidase domain 20	molecular_function:metalloendopeptidase activity | cellular_component:plasma membrane | biological_process:proteolysis | biological_process:single fertilization | biological_process:binding of sperm to zona pellucida | molecular_function:metallopeptidase activity | molecular_function:zinc ion binding | cellular_component:integral component of membrane | biological_process:multicellular organism r…
8747	NM_003813	ADAM21	17586	25344	24456	154500	160354	157516	1.70645	1.70645	0	0.00345444	0.00589485	-0.00589485	ADAM metallopeptidase domain 21	molecular_function:metalloendopeptidase activity | cellular_component:plasma membrane | biological_process:proteolysis | biological_process:single fertilization | biological_process:binding of sperm to zona pellucida | molecular_function:metallopeptidase activity | molecular_function:zinc ion binding | cellular_component:integral component of membrane | biological_process:multicellular organism r…
8745	NM_003812	ADAM23	18733	17763	16744	212231	201987	201910	1.35408	1.35408	1.21626	0.0468168	0.0633936	-0.0633936	ADAM metallopeptidase domain 23	molecular_function:metalloendopeptidase activity | molecular_function:integrin binding | molecular_function:protein binding | cellular_component:extracellular region | cellular_component:integral component of plasma membrane | biological_process:proteolysis | biological_process:cell adhesion | biological_process:central nervous system development | molecular_function:metallopeptidase activity | m…
10863	NM_021777	ADAM28	29075	28104	20695	217185	222991	230039	1.23132	1.23132	6.35904	0.0651742	0.0802501	-0.0802501	ADAM metallopeptidase domain 28	molecular_function:metalloendopeptidase activity | biological_process:proteolysis | molecular_function:zinc ion binding | cellular_component:extracellular region | cellular_component:plasma membrane | biological_process:spermatogenesis | molecular_function:metallopeptidase activity | cellular_component:integral component of membrane | molecular_function:protein binding | biological_process:integr…
11086	NM_014269	ADAM29	12774	17399	16498	230561	205699	219111	1.12886	1.12886	21.6065	0.157871	0.178215	-0.178215	ADAM metallopeptidase domain 29	molecular_function:metalloendopeptidase activity | biological_process:proteolysis | molecular_function:zinc ion binding | cellular_component:integral component of plasma membrane | biological_process:spermatogenesis | molecular_function:metallopeptidase activity
101	NM_001109	ADAM8	19757	16921	23305	221973	197849	197799	1.53744	1.53744	0.00681625	0.00791156	0.0121636	-0.0121636	ADAM metallopeptidase domain 8	biological_process:cell morphogenesis | biological_process:angiogenesis | cellular_component:podosome | biological_process:leukocyte migration involved in inflammatory response | biological_process:positive regulation of acute inflammatory response | molecular_function:metalloendopeptidase activity | molecular_function:calcium ion binding | molecular_function:protein binding | cellular_component:…
8754	NM_001005845	ADAM9	23499	19753	21364	217492	220417	225603	1.32455	1.32455	0.00681625	0.00123153	0.00163122	-0.00163122	ADAM metallopeptidase domain 9	molecular_function:metalloendopeptidase activity | biological_process:proteolysis | molecular_function:zinc ion binding | biological_process:activation of MAPKK activity | molecular_function:protein kinase C binding | molecular_function:integrin binding | molecular_function:protein binding | molecular_function:collagen binding | cellular_component:extracellular space | biological_process:membrane…
27299	NM_014479	ADAMDEC1	17531	19834	18392	241761	237563	234839	1.06315	1.06315	26.6081	0.108164	0.114995	-0.114995	ADAM-like, decysin 1	molecular_function:metalloendopeptidase activity | cellular_component:cellular_component | cellular_component:extracellular region | biological_process:proteolysis | biological_process:immune response | biological_process:negative regulation of cell adhesion | molecular_function:zinc ion binding
9510	NM_006988	ADAMTS1	72388	92284	60552	241541	208911	208641	1.0959	1.0959	26.6081	0.164596	0.180381	-0.180381	ADAM metallopeptidase with thrombospondin type 1 motif, 1	biological_process:proteolysis | cellular_component:cytoplasm | biological_process:integrin-mediated signaling pathway | molecular_function:metallopeptidase activity | molecular_function:zinc ion binding | biological_process:negative regulation of cell proliferation | molecular_function:metalloendopeptidase activity | cellular_component:extracellular matrix | molecular_function:protein binding | …
81792	NM_030955	ADAMTS12	27003	26082	25445	219556	211813	223760	1.69613	1.69613	0	0.00165003	0.00279866	-0.00279866	ADAM metallopeptidase with thrombospondin type 1 motif, 12	molecular_function:metalloendopeptidase activity | molecular_function:protein binding | cellular_component:proteinaceous extracellular matrix | biological_process:cell-matrix adhesion | molecular_function:zinc ion binding | biological_process:cell migration | biological_process:proteoglycan catabolic process | biological_process:negative regulation of chondrocyte differentiation | biological_proc…
11093	NM_139026	ADAMTS13	53923	37977	37729	236922	216921	240753	2.05752	2.05752	0	0.00110882	0.00228142	-0.00228142	ADAM metallopeptidase with thrombospondin type 1 motif, 13	molecular_function:metalloendopeptidase activity | molecular_function:integrin binding | molecular_function:calcium ion binding | molecular_function:protein binding | cellular_component:proteinaceous extracellular matrix | biological_process:proteolysis | biological_process:cell-matrix adhesion | biological_process:integrin-mediated signaling pathway | molecular_function:metallopeptidase activity…
140766	NM_080722	ADAMTS14	50727	46420	42007	151824	178613	196089	2.83887	2.83887	0	0.000335485	0.000952397	-0.000952397	ADAM metallopeptidase with thrombospondin type 1 motif, 14	molecular_function:metalloendopeptidase activity | cellular_component:extracellular region | cellular_component:proteinaceous extracellular matrix | biological_process:proteolysis | molecular_function:zinc ion binding | biological_process:extracellular matrix organization | biological_process:collagen catabolic process | biological_process:collagen fibril organization
170689	NM_139055	ADAMTS15	24902	25962	17513	233278	230982	245627	1.06068	1.06068	30.6466	0.19063	0.202196	-0.202196	ADAM metallopeptidase with thrombospondin type 1 motif, 15	molecular_function:metalloendopeptidase activity | cellular_component:proteinaceous extracellular matrix | biological_process:proteolysis | molecular_function:zinc ion binding
170690	NM_139056	ADAMTS16	18760	12207	19482	203546	223756	204697	1.10682	1.10682	26.6081	0.175194	0.193908	-0.193908	ADAM metallopeptidase with thrombospondin type 1 motif, 16	molecular_function:metalloendopeptidase activity | biological_process:proteolysis | molecular_function:zinc ion binding | cellular_component:proteinaceous extracellular matrix | biological_process:branching involved in ureteric bud morphogenesis
170691	NM_139057	ADAMTS17	53829	45051	36692	218442	187260	222505	2.29095	2.29095	0	0.00123273	0.00282413	-0.00282413	ADAM metallopeptidase with thrombospondin type 1 motif, 17	molecular_function:metalloendopeptidase activity | cellular_component:proteinaceous extracellular matrix | biological_process:proteolysis | molecular_function:zinc ion binding
170692	NM_199355	ADAMTS18	37049	30790	26171	185867	196087	190654	2.3004	2.3004	0	0.000426829	0.000981876	-0.000981876	ADAM metallopeptidase with thrombospondin type 1 motif, 18	biological_process:eye development | molecular_function:metalloendopeptidase activity | cellular_component:proteinaceous extracellular matrix | biological_process:proteolysis | molecular_function:zinc ion binding | biological_process:negative regulation of platelet aggregation | biological_process:integrin-mediated signaling pathway
171019	NM_133638	ADAMTS19	25569	21035	22814	245152	216385	230531	1.59603	1.59603	0	0.00130101	0.00207646	-0.00207646	ADAM metallopeptidase with thrombospondin type 1 motif, 19	molecular_function:metalloendopeptidase activity | cellular_component:proteinaceous extracellular matrix | biological_process:proteolysis | molecular_function:zinc ion binding
9509	NM_021599	ADAMTS2	10816	16287	14537	200767	164797	182246	1.32958	1.32958	6.35904	0.0998121	0.132708	-0.132708	ADAM metallopeptidase with thrombospondin type 1 motif, 2	molecular_function:metalloendopeptidase activity | cellular_component:extracellular region | cellular_component:proteinaceous extracellular matrix | biological_process:proteolysis | molecular_function:metallopeptidase activity | molecular_function:zinc ion binding | biological_process:extracellular matrix organization | biological_process:collagen catabolic process | biological_process:skin devel…
80070	NM_025003	ADAMTS20	34515	22732	16156	183137	189453	198960	1.4838	1.4838	1.21626	0.0568552	0.0843617	-0.0843617	ADAM metallopeptidase with thrombospondin type 1 motif, 20	cellular_component:proteinaceous extracellular matrix | molecular_function:zinc ion binding | molecular_function:metalloendopeptidase activity | biological_process:proteolysis | cellular_component:extracellular space | biological_process:positive regulation of signal transduction | biological_process:negative regulation of apoptotic process | biological_process:extracellular matrix organization |…
9507	NM_005099	ADAMTS4	23792	22759	22451	166575	193184	176575	1.75683	1.75683	0	0.000182852	0.000321239	-0.000321239	ADAM metallopeptidase with thrombospondin type 1 motif, 4	biological_process:skeletal system development | molecular_function:protease binding | molecular_function:metalloendopeptidase activity | molecular_function:protein binding | cellular_component:extracellular region | cellular_component:proteinaceous extracellular matrix | cellular_component:extracellular space | molecular_function:metallopeptidase activity | molecular_function:zinc ion binding | …
11096	NM_007038	ADAMTS5	37270	40794	34113	247331	238518	254400	1.68928	1.68928	0	0.00529235	0.00894025	-0.00894025	ADAM metallopeptidase with thrombospondin type 1 motif, 5	molecular_function:metalloendopeptidase activity | molecular_function:integrin binding | molecular_function:protein binding | cellular_component:extracellular region | cellular_component:proteinaceous extracellular matrix | biological_process:proteolysis | molecular_function:metallopeptidase activity | molecular_function:zinc ion binding | biological_process:extracellular matrix disassembly | bio…
11174	NM_197941	ADAMTS6	36613	31723	29106	242502	220529	227368	1.79668	1.79668	0	0.000282692	0.000507906	-0.000507906	ADAM metallopeptidase with thrombospondin type 1 motif, 6	molecular_function:metalloendopeptidase activity | cellular_component:proteinaceous extracellular matrix | biological_process:proteolysis | molecular_function:metallopeptidase activity | molecular_function:zinc ion binding
11173	NM_014272	ADAMTS7	35178	30539	32141	261184	259223	267116	1.5032	1.5032	0	0.00187902	0.00282455	-0.00282455	ADAM metallopeptidase with thrombospondin type 1 motif, 7	molecular_function:metalloendopeptidase activity | molecular_function:protein binding | cellular_component:proteinaceous extracellular matrix | molecular_function:metallopeptidase activity | molecular_function:zinc ion binding | biological_process:negative regulation of chondrocyte differentiation | biological_process:proteolysis involved in cellular protein catabolic process | biological_process…
11095	NM_007037	ADAMTS8	31714	27019	24036	216839	211430	226192	1.7138	1.7138	0	0.00036246	0.000621183	-0.000621183	ADAM metallopeptidase with thrombospondin type 1 motif, 8	molecular_function:metalloendopeptidase activity | molecular_function:integrin binding | cellular_component:proteinaceous extracellular matrix | biological_process:proteolysis | molecular_function:heparin binding | molecular_function:metallopeptidase activity | molecular_function:zinc ion binding | biological_process:negative regulation of cell proliferation | molecular_function:low affinity phos…
56999	NM_182920	ADAMTS9	29831	21036	25220	222407	225281	235003	1.50465	1.50465	0	0.00414912	0.00624298	-0.00624298	ADAM metallopeptidase with thrombospondin type 1 motif, 9	molecular_function:metalloendopeptidase activity | cellular_component:proteinaceous extracellular matrix | cellular_component:endoplasmic reticulum | biological_process:proteolysis | biological_process:glycoprotein catabolic process | biological_process:multicellular organismal development | molecular_function:metallopeptidase activity | molecular_function:zinc ion binding | biological_process:pr…
103	NM_015841	ADAR	97950	278929	145828	238189	237252	238275	1.08632	1.08632	30.6466	0.1917	0.208248	-0.208248	adenosine deaminase, RNA-specific	molecular_function:DNA binding | molecular_function:double-stranded RNA adenosine deaminase activity | molecular_function:protein binding | cellular_component:nucleus | cellular_component:nucleoplasm | cellular_component:nucleolus | cellular_component:cytoplasm | biological_process:adenosine to inosine editing | biological_process:mRNA processing | biological_process:protein import into nucleus |…
105	NM_018702	ADARB2	88075	73648	59449	296989	298057	247438	1.66512	1.66512	0	0.000391643	0.000652132	-0.000652132	adenosine deaminase, RNA-specific, B2 (non-functional)	molecular_function:RNA binding | molecular_function:adenosine deaminase activity | biological_process:RNA processing | molecular_function:double-stranded RNA binding | molecular_function:single-stranded RNA binding | cellular_component:nucleus | biological_process:mRNA processing | molecular_function:poly(A) RNA binding | molecular_function:poly(A) RNA binding | molecular_function:poly(A) RNA bin…
23536	NM_012091	ADAT1	71842	78249	75277	206083	191389	187223	1.46947	1.46947	0	8.19e-05	0.00012035	-0.00012035	adenosine deaminase, tRNA-specific 1	molecular_function:RNA binding | molecular_function:adenosine deaminase activity | biological_process:RNA processing | biological_process:tRNA processing | molecular_function:tRNA-specific adenosine deaminase activity | molecular_function:metal ion binding
57143	NM_020421	ADCK1	182114	179095	176688	284922	270053	272530	1.66565	1.66565	0	0.00638932	0.0106424	-0.0106424	aarF domain containing kinase 1	molecular_function:protein serine/threonine kinase activity | molecular_function:ATP binding | cellular_component:extracellular region | biological_process:protein phosphorylation | molecular_function:protein kinase activity | molecular_function:transferase activity, transferring phosphorus-containing groups | cellular_component:mitochondrion | biological_process:metabolic process
107	NM_021116	ADCY1	39927	38622	45164	202487	198876	201575	1.35428	1.35428	0.137128	0.0122201	0.0165494	-0.0165494	adenylate cyclase 1 (brain)	molecular_function:nucleotide binding | biological_process:cyclic nucleotide biosynthetic process | cellular_component:integral component of membrane | molecular_function:phosphorus-oxygen lyase activity | biological_process:intracellular signal transduction | molecular_function:calmodulin binding | molecular_function:ATP binding | cellular_component:plasma membrane | biological_process:energy re…
108	NM_020546	ADCY2	21820	18426	20600	308920	299881	319538	1.48115	1.48115	0	0.000649635	0.000962207	-0.000962207	adenylate cyclase 2 (brain)	biological_process:intracellular signal transduction | molecular_function:adenylate cyclase activity | molecular_function:ATP binding | cellular_component:cytoplasm | cellular_component:plasma membrane | biological_process:energy reserve metabolic process | biological_process:cAMP biosynthetic process | biological_process:water transport | biological_process:epidermal growth factor receptor signa…
109	NM_004036	ADCY3	14232	19230	17507	243570	255440	246458	1.02711	1.02711	33.6721	0.210397	0.2161	-0.2161	adenylate cyclase 3	molecular_function:adenylate cyclase activity | molecular_function:calmodulin binding | molecular_function:ATP binding | cellular_component:cytoplasm | cellular_component:plasma membrane | cellular_component:integral component of plasma membrane | biological_process:energy reserve metabolic process | biological_process:cAMP biosynthetic process | biological_process:water transport | biological_pr…
196883	NM_139247	ADCY4	12703	15007	11838	280205	276119	273200	1.23169	1.23169	6.35904	0.0674577	0.0830866	-0.0830866	adenylate cyclase 4	molecular_function:adenylate cyclase activity | molecular_function:protein binding | molecular_function:ATP binding | cellular_component:cytoplasm | cellular_component:plasma membrane | biological_process:energy reserve metabolic process | biological_process:cAMP biosynthetic process | biological_process:water transport | biological_process:signal transduction | biological_process:epidermal growt…
111	NM_183357	ADCY5	29143	28057	25941	221860	199403	181264	1.55482	1.55482	0.042001	0.0195847	0.0304507	-0.0304507	adenylate cyclase 5	biological_process:intracellular signal transduction | molecular_function:nucleotide binding | biological_process:cAMP biosynthetic process | cellular_component:integral component of membrane | molecular_function:adenylate cyclase activity | molecular_function:ATP binding | cellular_component:plasma membrane | biological_process:energy reserve metabolic process | biological_process:water transpor…
112	NM_015270	ADCY6	81026	80045	96600	266527	252693	256256	1.27131	1.27131	0.137128	0.00186442	0.00237027	-0.00237027	adenylate cyclase 6	molecular_function:adenylate cyclase activity | molecular_function:protein binding | molecular_function:ATP binding | cellular_component:plasma membrane | cellular_component:cilium | biological_process:energy reserve metabolic process | biological_process:cAMP biosynthetic process | biological_process:water transport | biological_process:signal transduction | biological_process:epidermal growth f…
113	NM_001114	ADCY7	54014	53529	49157	247477	255234	244562	1.13058	1.13058	16.2507	0.0855001	0.0966646	-0.0966646	adenylate cyclase 7	molecular_function:adenylate cyclase activity | molecular_function:ATP binding | cellular_component:plasma membrane | biological_process:energy reserve metabolic process | biological_process:water transport | biological_process:signal transduction | biological_process:epidermal growth factor receptor signaling pathway | biological_process:adenylate cyclase-activating G-protein coupled receptor si…
114	NM_001115	ADCY8	106367	100642	107647	235184	232322	227067	2.08436	2.08436	0	0.000225552	0.000470132	-0.000470132	adenylate cyclase 8 (brain)	molecular_function:nucleotide binding | biological_process:intracellular signal transduction | molecular_function:adenylate cyclase activity | molecular_function:ATP binding | cellular_component:plasma membrane | biological_process:energy reserve metabolic process | biological_process:cAMP biosynthetic process | biological_process:water transport | biological_process:epidermal growth factor recep…
115	NM_001116	ADCY9	77403	66314	76489	201506	207967	209724	1.08578	1.08578	21.6065	0.0801321	0.0870056	-0.0870056	adenylate cyclase 9	molecular_function:adenylate cyclase activity | molecular_function:ATP binding | cellular_component:plasma membrane | cellular_component:integral component of plasma membrane | biological_process:energy reserve metabolic process | biological_process:water transport | biological_process:signal transduction | biological_process:epidermal growth factor receptor signaling pathway | biological_process…
116	NM_001117	ADCYAP1	78356	63259	57649	241591	254229	245082	1.22224	1.22224	1.21626	0.0103572	0.012659	-0.012659	adenylate cyclase activating polypeptide 1 (pituitary)	molecular_function:receptor binding | molecular_function:neuropeptide hormone activity | cellular_component:extracellular region | biological_process:transmembrane receptor protein tyrosine kinase signaling pathway | biological_process:activation of adenylate cyclase activity | biological_process:neuropeptide signaling pathway | biological_process:cell-cell signaling | biological_process:female p…
117	NM_001118	ADCYAP1R1	67187	65745	65767	224050	226749	224448	2.79943	2.79943	0	1.13e-05	3.16336e-05	-3.16336e-05	adenylate cyclase activating polypeptide 1 (pituitary) receptor type I	molecular_function:vasoactive intestinal polypeptide receptor activity | biological_process:G-protein coupled receptor signaling pathway | molecular_function:protein binding | cellular_component:plasma membrane | cellular_component:integral component of plasma membrane | biological_process:cell surface receptor signaling pathway | biological_process:transmembrane receptor protein tyrosine kinase …
118	NM_001119	ADD1	16618	20359	16975	219697	223301	209761	1.14273	1.14273	16.2507	0.123552	0.141187	-0.141187	adducin 1 (alpha)	cellular_component:cytoskeleton | cellular_component:plasma membrane | cellular_component:intermediate filament cytoskeleton | molecular_function:actin binding | molecular_function:calmodulin binding | cellular_component:nucleus | cellular_component:cytosol | biological_process:apoptotic process | biological_process:cellular component disassembly involved in execution phase of apoptosis | biologi…
119	NM_017484	ADD2	212644	209927	193242	257394	253617	264043	1.02962	1.02962	30.6466	0.019355	0.0199283	-0.0199283	adducin 2 (beta)	cellular_component:cytoskeleton | molecular_function:actin binding | molecular_function:calmodulin binding | cellular_component:plasma membrane | biological_process:protein complex assembly | cellular_component:F-actin capping protein complex | cellular_component:cytoplasmic membrane-bounded vesicle | biological_process:actin cytoskeleton organization | molecular_function:spectrin binding | biolo…
123	NM_001122	ADFP	89770	75931	80648	224450	227248	239477	1.21476	1.21476	2.9389	0.0283401	0.0344265	-0.0344265	perilipin 2	cellular_component:extracellular region | cellular_component:endoplasmic reticulum | cellular_component:lipid particle | cellular_component:plasma membrane | biological_process:cellular lipid metabolic process | biological_process:small molecule metabolic process | molecular_function:protein binding | cellular_component:cytoplasm | cellular_component:nucleus | cellular_component:cytosol | biologi…
124	NM_000667	ADH1A	61553	62750	63071	217021	234636	222886	1.27477	1.27477	0.443512	0.00986793	0.0125794	-0.0125794	alcohol dehydrogenase 1A (class I), alpha polypeptide	molecular_function:alcohol dehydrogenase (NAD) activity | molecular_function:alcohol dehydrogenase (NAD) activity | molecular_function:alcohol dehydrogenase (NAD) activity | molecular_function:alcohol dehydrogenase (NAD) activity | molecular_function:alcohol dehydrogenase (NAD) activity | molecular_function:alcohol dehydrogenase (NAD) activity | molecular_function:alcohol dehydrogenase (NAD) acti…
125	NM_000668	ADH1B	92586	94757	120224	239362	244488	230633	1.01254	1.01254	37.008	0.221859	0.224642	-0.224642	alcohol dehydrogenase 1B (class I), beta polypeptide	molecular_function:alcohol dehydrogenase activity, zinc-dependent | cellular_component:cytosol | biological_process:ethanol oxidation | biological_process:xenobiotic metabolic process | molecular_function:zinc ion binding | biological_process:small molecule metabolic process | molecular_function:oxidoreductase activity | biological_process:oxidation-reduction process | molecular_function:transfer…
126	NM_000669	ADH1C	25386	25626	22161	98846	76311	93123	1.92623	1.92623	0	0.00189829	0.00365656	-0.00365656	alcohol dehydrogenase 1C (class I), gamma polypeptide	molecular_function:alcohol dehydrogenase (NAD) activity | molecular_function:alcohol dehydrogenase (NAD) activity | molecular_function:alcohol dehydrogenase (NAD) activity | molecular_function:alcohol dehydrogenase (NAD) activity | molecular_function:alcohol dehydrogenase (NAD) activity | molecular_function:alcohol dehydrogenase (NAD) activity | molecular_function:alcohol dehydrogenase (NAD) acti…
127	NM_000670	ADH4	40328	39856	45996	161815	169505	142118	1.80941	1.80941	0	0.00309583	0.00560165	-0.00560165	alcohol dehydrogenase 4 (class II), pi polypeptide	molecular_function:alcohol dehydrogenase activity, zinc-dependent | biological_process:ethanol oxidation | molecular_function:zinc ion binding | molecular_function:ethanol binding | biological_process:retinoid metabolic process | molecular_function:NADPH:quinone reductase activity | molecular_function:alcohol dehydrogenase (NAD) activity | molecular_function:alcohol dehydrogenase (NAD) activity |…
128	NM_000671	ADH5	57943	59526	59151	222777	196513	206399	1.01024	1.01024	37.008	0.224664	0.226964	-0.226964	alcohol dehydrogenase 5 (class III), chi polypeptide	molecular_function:zinc ion binding | biological_process:oxidation-reduction process | molecular_function:alcohol dehydrogenase (NAD) activity | molecular_function:alcohol dehydrogenase (NAD) activity | molecular_function:alcohol dehydrogenase (NAD) activity | molecular_function:alcohol dehydrogenase (NAD) activity | molecular_function:alcohol dehydrogenase (NAD) activity | molecular_function:alc…
130	NM_000672	ADH6	21369	15383	9374	272681	272835	264100	1.17208	1.17208	21.6065	0.163636	0.191794	-0.191794	alcohol dehydrogenase 6 (class V)	molecular_function:alcohol dehydrogenase activity, zinc-dependent | biological_process:ethanol oxidation | molecular_function:zinc ion binding | molecular_function:ethanol binding | molecular_function:oxidoreductase activity | biological_process:oxidation-reduction process | molecular_function:alcohol dehydrogenase (NAD) activity | molecular_function:alcohol dehydrogenase (NAD) activity | molecul…
132	NM_001123	ADK	93252	116539	97523	257538	264793	253292	1.01047	1.01047	37.008	0.229423	0.231826	-0.231826	adenosine kinase	molecular_function:adenosine kinase activity | molecular_function:ATP binding | cellular_component:nucleus | cellular_component:cytosol | biological_process:purine nucleobase metabolic process | biological_process:ribonucleoside monophosphate biosynthetic process | biological_process:phosphorylation | molecular_function:phosphotransferase activity, alcohol group as acceptor | biological_process:p…
133	NM_001124	ADM	111326	90172	95611	173944	167122	168019	1.14434	1.14434	6.35904	0.0237234	0.0271476	-0.0271476	adrenomedullin	molecular_function:hormone activity | biological_process:vasculogenesis | biological_process:G-protein coupled receptor internalization | molecular_function:receptor binding | molecular_function:protein binding | cellular_component:extracellular region | cellular_component:extracellular space | cellular_component:cytoplasm | biological_process:cAMP biosynthetic process | biological_process:proges…
79924	NM_024866	ADM2	44762	46648	50599	267869	267955	275934	1.0351	1.0351	30.6466	0.145145	0.15024	-0.15024	adrenomedullin 2	biological_process:angiogenesis | molecular_function:hormone activity | cellular_component:extracellular region | biological_process:protein phosphorylation | biological_process:positive regulation of gene expression | molecular_function:protein complex binding | biological_process:positive regulation of angiogenesis | biological_process:digestion | biological_process:negative regulation of blood…
11318	NM_007264	ADMR	44202	39040	46297	206362	195619	214853	2.99076	2.99076	0	0.000769533	0.00230149	-0.00230149	G protein-coupled receptor 182	molecular_function:transmembrane signaling receptor activity | molecular_function:G-protein coupled receptor activity | cellular_component:plasma membrane | biological_process:cell surface receptor signaling pathway | biological_process:G-protein coupled receptor signaling pathway | cellular_component:integral component of membrane
23394	NM_015339	ADNP	82153	77676	84905	278731	291857	268406	1.72789	1.72789	0	0.00021724	0.000375367	-0.000375367	activity-dependent neuroprotector homeobox	molecular_function:sequence-specific DNA binding transcription factor activity | molecular_function:protein binding | cellular_component:nucleus | biological_process:transcription, DNA-templated | biological_process:regulation of transcription, DNA-templated | molecular_function:metal ion binding | molecular_function:chromatin binding | cellular_component:extracellular space | biological_process:…
134	NM_001048230	ADORA1	45687	41024	49448	225821	231501	215325	1.92107	1.92107	0	0.000260566	0.000500565	-0.000500565	adenosine A1 receptor	molecular_function:G-protein coupled adenosine receptor activity | biological_process:adenosine receptor signaling pathway | molecular_function:protein binding | cellular_component:plasma membrane | cellular_component:integral component of plasma membrane | biological_process:phagocytosis | biological_process:inflammatory response | biological_process:signal transduction | biological_process:cell…
135	NM_000675	ADORA2A	33318	40319	32582	224454	220163	230459	1.30369	1.30369	0.042001	0.00292035	0.00380722	-0.00380722	adenosine A2a receptor	molecular_function:protein dimerization activity | cellular_component:integral component of membrane | molecular_function:G-protein coupled adenosine receptor activity | molecular_function:protein binding | cellular_component:plasma membrane | cellular_component:integral component of plasma membrane | biological_process:cAMP biosynthetic process | biological_process:phagocytosis | biological_proc…
136	NM_000676	ADORA2B	33404	33010	31921	228793	226044	224326	1.43765	1.43765	0	3.66e-05	5.2618e-05	-5.2618e-05	adenosine A2b receptor	biological_process:activation of MAPK activity | molecular_function:G-protein coupled adenosine receptor activity | biological_process:adenosine receptor signaling pathway | cellular_component:plasma membrane | cellular_component:integral component of plasma membrane | biological_process:cellular defense response | biological_process:G-protein coupled receptor signaling pathway | biological_proce…
140	NM_000677	ADORA3	50608	51429	47503	232503	236531	240146	2.093	2.093	0	1.5e-05	3.13951e-05	-3.13951e-05	adenosine A3 receptor	cellular_component:plasma membrane | biological_process:inflammatory response | biological_process:signal transduction | biological_process:activation of adenylate cyclase activity | biological_process:regulation of heart contraction | biological_process:response to wounding | molecular_function:G-protein coupled receptor activity | biological_process:G-protein coupled receptor signaling pathway …
80339	NM_025225	ADPN	108131	97993	96570	197881	220144	231682	1.66939	1.66939	0	0.000645437	0.00107749	-0.00107749	patatin-like phospholipase domain containing 3	molecular_function:phospholipase A2 activity | molecular_function:triglyceride lipase activity | cellular_component:endoplasmic reticulum membrane | biological_process:phospholipid metabolic process | cellular_component:integral component of membrane | biological_process:triglyceride biosynthetic process | biological_process:triglyceride catabolic process | biological_process:acylglycerol acyl-ch…
141	NM_001125	ADPRH	243616	200230	235713	252775	267810	254668	1.06076	1.06076	26.6081	0.123032	0.130508	-0.130508	ADP-ribosylarginine hydrolase	molecular_function:magnesium ion binding | molecular_function:ADP-ribosylarginine hydrolase activity | biological_process:cellular protein modification process | biological_process:protein de-ADP-ribosylation
113622	NM_138430	ADPRHL1	77309	88118	105966	189124	201419	207283	1.54068	1.54068	0.443512	0.0523404	0.0806396	-0.0806396	ADP-ribosylhydrolase like 1	molecular_function:magnesium ion binding | molecular_function:ADP-ribosylarginine hydrolase activity | biological_process:protein de-ADP-ribosylation
54936	NM_017825	ADPRHL2	258025	263604	296944	289410	293876	290809	1.62967	1.62967	0	0.000476813	0.000777046	-0.000777046	ADP-ribosylhydrolase like 2	molecular_function:poly(ADP-ribose) glycohydrolase activity | molecular_function:poly(ADP-ribose) glycohydrolase activity | molecular_function:poly(ADP-ribose) glycohydrolase activity | molecular_function:poly(ADP-ribose) glycohydrolase activity | molecular_function:poly(ADP-ribose) glycohydrolase activity | molecular_function:poly(ADP-ribose) glycohydrolase activity | molecular_function:poly(ADP…
10039	NM_001003931	ADPRTL3	71751	59049	48004	157469	155452	149894	1.26473	1.26473	2.9389	0.0572727	0.0724344	-0.0724344	poly (ADP-ribose) polymerase family, member 3	biological_process:telomere maintenance | molecular_function:catalytic activity | molecular_function:NAD+ ADP-ribosyltransferase activity | molecular_function:NAD+ ADP-ribosyltransferase activity | molecular_function:NAD+ ADP-ribosyltransferase activity | molecular_function:NAD+ ADP-ribosyltransferase activity | molecular_function:NAD+ ADP-ribosyltransferase activity | molecular_function:NAD+ ADP…
148	NM_033304	ADRA1A	33170	29696	33039	174643	174905	175609	1.51797	1.51797	0	0.00176672	0.00268182	-0.00268182	adrenoceptor alpha 1A	molecular_function:alpha1-adrenergic receptor activity | cellular_component:nucleus | cellular_component:plasma membrane | cellular_component:integral component of plasma membrane | biological_process:apoptotic process | biological_process:smooth muscle contraction | biological_process:signal transduction | biological_process:G-protein coupled receptor signaling pathway | biological_process:activ…
146	NM_000678	ADRA1D	36514	43599	46878	226372	230955	230044	1.9989	1.9989	0	0.0108858	0.0217597	-0.0217597	adrenoceptor alpha 1D	cellular_component:plasma membrane | cellular_component:integral component of plasma membrane | biological_process:DNA metabolic process | biological_process:G-protein coupled receptor signaling pathway | biological_process:adenylate cyclase-modulating G-protein coupled receptor signaling pathway | biological_process:cell-cell signaling | biological_process:multicellular organismal development | …
150	NM_000681	ADRA2A	24917	25808	26060	250305	248460	255988	1.45133	1.45133	0.00681625	0.005008	0.00726828	-0.00726828	adrenoceptor alpha 2A	biological_process:positive regulation of cytokine production | molecular_function:alpha2-adrenergic receptor activity | molecular_function:protein binding | cellular_component:cytoplasm | cellular_component:plasma membrane | cellular_component:integral component of plasma membrane | biological_process:energy reserve metabolic process | biological_process:cellular component movement | biological_…
151	NM_000682	ADRA2B	36221	35288	32086	216895	232032	221336	1.15171	1.15171	2.9389	0.00251318	0.00289444	-0.00289444	adrenoceptor alpha 2B	molecular_function:alpha2-adrenergic receptor activity | molecular_function:protein binding | cellular_component:plasma membrane | cellular_component:integral component of plasma membrane | biological_process:G-protein coupled receptor signaling pathway | biological_process:cell-cell signaling | biological_process:blood coagulation | biological_process:negative regulation of norepinephrine secret…
152	NM_000683	ADRA2C	57544	41987	47768	228082	263129	220609	1.71289	1.71289	0	0.00695258	0.011909	-0.011909	adrenoceptor alpha 2C	molecular_function:alpha2-adrenergic receptor activity | cellular_component:plasma membrane | biological_process:regulation of smooth muscle contraction | cellular_component:integral component of membrane | biological_process:regulation of vasoconstriction | biological_process:platelet activation | biological_process:adrenergic receptor signaling pathway | molecular_function:G-protein coupled rec…
153	NM_000684	ADRB1	38778	41905	44512	240925	240898	225751	1.68144	1.68144	0	0.000132988	0.000223611	-0.000223611	adrenoceptor beta 1	molecular_function:beta-adrenergic receptor activity | molecular_function:receptor signaling protein activity | molecular_function:Ras guanyl-nucleotide exchange factor activity | molecular_function:protein binding | cellular_component:early endosome | cellular_component:plasma membrane | cellular_component:integral component of plasma membrane | biological_process:activation of adenylate cyclase…
155	NM_000025	ADRB3	64031	69042	80884	190275	179423	191486	3.15934	3.15934	0	9.25e-05	0.000292239	-0.000292239	adrenoceptor beta 3	molecular_function:beta-adrenergic receptor activity | molecular_function:protein binding | cellular_component:plasma membrane | cellular_component:integral component of plasma membrane | biological_process:carbohydrate metabolic process | biological_process:generation of precursor metabolites and energy | biological_process:energy reserve metabolic process | biological_process:G-protein coupled …
156	NM_001619	ADRBK1	63804	57849	56134	180001	162049	161949	1.21387	1.21387	11.095	0.101888	0.123679	-0.123679	adrenergic, beta, receptor kinase 1	biological_process:desensitization of G-protein coupled receptor protein signaling pathway | biological_process:negative regulation of the force of heart contraction by chemical signal | molecular_function:protein kinase activity | molecular_function:G-protein coupled receptor kinase activity | molecular_function:protein binding | molecular_function:ATP binding | cellular_component:cytoplasm | ce…
157	NM_005160	ADRBK2	100933	102896	77230	260400	242564	252982	1.56271	1.56271	0	0.0016322	0.00255065	-0.00255065	adrenergic, beta, receptor kinase 2	molecular_function:protein kinase activity | molecular_function:ATP binding | biological_process:protein phosphorylation | biological_process:signal transduction | biological_process:receptor internalization | biological_process:termination of G-protein coupled receptor signaling pathway | molecular_function:beta-adrenergic receptor kinase activity | biological_process:regulation of G-protein cou…
158	NM_000026	ADSL	275878	250834	265873	298178	284657	298827	1.09088	1.09088	16.2507	0.0407381	0.0444404	-0.0444404	adenylosuccinate lyase	molecular_function:catalytic activity | molecular_function:N6-(1,2-dicarboxyethyl)AMP AMP-lyase (fumarate-forming) activity | molecular_function:N6-(1,2-dicarboxyethyl)AMP AMP-lyase (fumarate-forming) activity | molecular_function:N6-(1,2-dicarboxyethyl)AMP AMP-lyase (fumarate-forming) activity | molecular_function:N6-(1,2-dicarboxyethyl)AMP AMP-lyase (fumarate-forming) activity | molecular_funct…
165	NM_001129	AEBP1	16860	19468	24523	257892	245086	248953	1.02189	1.02189	36.0237	0.22138	0.226225	-0.226225	AE binding protein 1	biological_process:negative regulation of transcription from RNA polymerase II promoter | molecular_function:RNA polymerase II regulatory region sequence-specific DNA binding | molecular_function:RNA polymerase II transcription regulatory region sequence-specific DNA binding transcription factor activity involved in negative regulation of transcription | biological_process:skeletal system develop…
121536	NM_153207	AEBP2	196078	165933	151693	225811	228497	231342	1.128	1.128	6.35904	0.0100546	0.0113415	-0.0113415	AE binding protein 2	molecular_function:metal ion binding | biological_process:transcription, DNA-templated | biological_process:chromatin modification | cellular_component:ESC/E(Z) complex | cellular_component:ESC/E(Z) complex | cellular_component:ESC/E(Z) complex | cellular_component:ESC/E(Z) complex | cellular_component:ESC/E(Z) complex | cellular_component:ESC/E(Z) complex | cellular_component:ESC/E(Z) complex | …
158056	NM_206920	AEGP	101126	102883	94745	195428	199739	213795	1.57449	1.57449	0	0.00388007	0.00610915	-0.00610915	MAM domain containing 4	biological_process:protein transport | cellular_component:integral component of membrane | molecular_function:protein binding
166	NM_198970	AES	145953	143836	164417	304317	300442	314216	1.44144	1.44144	0	0.00198917	0.00286728	-0.00286728	amino-terminal enhancer of split	biological_process:negative regulation of transcription from RNA polymerase II promoter | molecular_function:transcription corepressor activity | molecular_function:protein binding | cellular_component:nucleus | biological_process:transcription, DNA-templated | biological_process:multicellular organismal development | biological_process:organ morphogenesis | biological_process:negative regulation…
57082	NM_144508	AF15Q14	60194	54066	50907	167943	179776	163262	1.73786	1.73786	0	0.00082423	0.00143239	-0.00143239	cancer susceptibility candidate 5	biological_process:mitotic cell cycle | cellular_component:condensed chromosome kinetochore | cellular_component:acrosomal vesicle | biological_process:acrosome assembly | molecular_function:protein binding | cellular_component:nucleus | cellular_component:nucleoplasm | cellular_component:cytoplasm | cellular_component:cytosol | biological_process:nucleosome assembly | biological_process:mitotic …
27125	NM_014423	AF5Q31	32937	39618	24932	211184	204381	187772	1.78676	1.78676	0	0.000651891	0.00116477	-0.00116477	AF4/FMR2 family, member 4	molecular_function:sequence-specific DNA binding transcription factor activity | molecular_function:protein binding | cellular_component:nucleus | cellular_component:nucleolus | cellular_component:mitochondrion | biological_process:regulation of transcription, DNA-templated | biological_process:transcription from RNA polymerase II promoter | biological_process:spermatid development
174	NM_001134	AFP	38661	42121	56653	186281	234246	197638	1.2881	1.2881	0.137128	0.00511536	0.0065891	-0.0065891	alpha-fetoprotein	cellular_component:cytoplasm | biological_process:transport | molecular_function:metal ion binding | cellular_component:extracellular space | biological_process:SMAD protein signal transduction | biological_process:ovulation from ovarian follicle | biological_process:sexual reproduction | biological_process:progesterone metabolic process
177	NM_172197	AGER	62888	72155	103872	215316	222402	229400	2.1468	2.1468	0	9.75e-05	0.000209313	-0.000209313	advanced glycosylation end product-specific receptor	molecular_function:protein binding | molecular_function:receptor activity | molecular_function:transmembrane signaling receptor activity | cellular_component:extracellular region | cellular_component:plasma membrane | cellular_component:integral component of plasma membrane | biological_process:inflammatory response | biological_process:cell surface receptor signaling pathway | biological_process…
178	NM_000644	AGL	80667	79840	96796	190605	192030	193924	2.03896	2.03896	0	0.000227735	0.000464342	-0.000464342	amylo-alpha-1, 6-glucosidase, 4-alpha-glucanotransferase	molecular_function:glycogen debranching enzyme activity | molecular_function:4-alpha-glucanotransferase activity | molecular_function:amylo-alpha-1,6-glucosidase activity | molecular_function:protein binding | cellular_component:nucleus | cellular_component:cytoplasm | cellular_component:cytosol | biological_process:carbohydrate metabolic process | biological_process:glycogen biosynthetic process…
79814	NM_024758	AGMAT	17564	15770	11458	237704	217959	193217	1.60805	1.60805	1.21626	0.0781214	0.125623	-0.125623	agmatine ureohydrolase (agmatinase)	cellular_component:mitochondrion | biological_process:polyamine metabolic process | biological_process:spermidine biosynthetic process | molecular_function:agmatinase activity | biological_process:putrescine biosynthetic process from arginine | biological_process:cellular nitrogen compound metabolic process | biological_process:small molecule metabolic process | molecular_function:metal ion bindi…
56894	NM_020132	AGPAT3	63248	64967	73305	209176	159222	199425	1.59946	1.59946	0	0.00199602	0.00319254	-0.00319254	1-acylglycerol-3-phosphate O-acyltransferase 3	biological_process:metabolic process | molecular_function:transferase activity, transferring acyl groups | molecular_function:1-acylglycerol-3-phosphate O-acyltransferase activity | cellular_component:nuclear envelope | cellular_component:endoplasmic reticulum | cellular_component:endoplasmic reticulum membrane | cellular_component:plasma membrane | biological_process:phospholipid metabolic proce…
375790	NM_198576	AGRN	170113	142937	131120	227440	229776	230217	1.00713	1.00713	37.008	0.233245	0.234908	-0.234908	agrin	biological_process:retinoid metabolic process | molecular_function:dystroglycan binding | molecular_function:structural constituent of cytoskeleton | molecular_function:calcium ion binding | molecular_function:protein binding | cellular_component:extracellular region | cellular_component:basal lamina | cellular_component:cytoplasm | cellular_component:Golgi lumen | cellular_component:plasma membr…
181	NM_001138	AGRP	238069	249117	242978	217112	239034	248522	1.1176	1.1176	11.095	0.0145402	0.0162501	-0.0162501	agouti related neuropeptide	molecular_function:receptor binding | molecular_function:neuropeptide hormone activity | cellular_component:extracellular space | cellular_component:Golgi lumen | biological_process:neuropeptide signaling pathway | biological_process:feeding behavior | biological_process:hormone-mediated signaling pathway | biological_process:regulation of feeding behavior | cellular_component:extracellular vesic…
23287	NM_015239	AGTPBP1	20268	20932	23765	252161	245750	236911	1.12731	1.12731	16.2507	0.102518	0.115569	-0.115569	ATP/GTP binding protein 1	biological_process:eye photoreceptor cell differentiation | molecular_function:metallocarboxypeptidase activity | cellular_component:nucleus | cellular_component:mitochondrion | cellular_component:cytosol | biological_process:proteolysis | biological_process:mitochondrion organization | molecular_function:zinc ion binding | molecular_function:tubulin binding | biological_process:cerebellar Purkin…
185	NM_032049	AGTR1	42037	42366	37987	282483	277169	269557	1.40277	1.40277	0	0.00103924	0.00145781	-0.00145781	angiotensin II receptor, type 1	biological_process:regulation of cell growth | molecular_function:angiotensin type I receptor activity | biological_process:kidney development | biological_process:renin-angiotensin regulation of aldosterone production | biological_process:regulation of blood vessel size by renin-angiotensin | biological_process:regulation of systemic arterial blood pressure by renin-angiotensin | molecular_funct…
186	NM_000686	AGTR2	46920	44032	38621	273073	270074	273736	1.62028	1.62028	0	0.000146462	0.00023731	-0.00023731	angiotensin II receptor, type 2	biological_process:blood vessel remodeling | biological_process:regulation of systemic arterial blood pressure by circulatory renin-angiotensin | molecular_function:angiotensin type II receptor activity | molecular_function:protein binding | cellular_component:extracellular region | cellular_component:plasma membrane | cellular_component:integral component of plasma membrane | biological_process:…
187	NM_005161	AGTRL1	26225	25636	19735	222069	222218	218558	1.06408	1.06408	26.6081	0.11639	0.123848	-0.123848	apelin receptor	molecular_function:receptor activity | molecular_function:G-protein coupled receptor activity | cellular_component:plasma membrane | cellular_component:integral component of plasma membrane | biological_process:G-protein coupled receptor signaling pathway | biological_process:gastrulation | biological_process:heart development | cellular_component:integral component of membrane | biological_proce…
64902	NM_031900	AGXT2	21721	24664	28800	140485	119899	143548	1.02915	1.02915	33.6721	0.198461	0.204247	-0.204247	alanine--glyoxylate aminotransferase 2	cellular_component:mitochondrion | cellular_component:mitochondrial matrix | biological_process:pyrimidine nucleobase metabolic process | molecular_function:alanine-glyoxylate transaminase activity | biological_process:glyoxylate catabolic process | biological_process:glycine biosynthetic process, by transamination of glyoxylate | biological_process:L-alanine catabolic process, by transamination …
64850	NM_031279	AGXT2L1	110473	106451	122413	245291	236771	241983	1.2742	1.2742	0.042001	0.00161583	0.00205889	-0.00205889	ethanolamine-phosphate phospho-lyase	biological_process:metabolic process | molecular_function:transaminase activity | molecular_function:pyridoxal phosphate binding | cellular_component:cellular_component | cellular_component:mitochondrion | molecular_function:ethanolamine-phosphate phospho-lyase activity
10768	NM_006621	AHCYL1	64265	68113	80847	187592	205104	195243	1.68956	1.68956	0.00681625	0.0180924	0.0305683	-0.0305683	adenosylhomocysteinase-like 1	molecular_function:adenosylhomocysteinase activity | molecular_function:protein binding | cellular_component:endoplasmic reticulum | biological_process:one-carbon metabolic process | cellular_component:extracellular vesicular exosome | molecular_function:NAD binding | biological_process:oxidation-reduction process | molecular_function:ketol-acid reductoisomerase activity | biological_process:cell…
54806	NM_017651	AHI1	69936	56858	49921	252118	235063	212572	1.08488	1.08488	26.6081	0.156189	0.169446	-0.169446	Abelson helper integration site 1	biological_process:morphogenesis of a polarized epithelium | biological_process:heart looping | biological_process:positive regulation of receptor internalization | molecular_function:protein binding | cellular_component:centrosome | cellular_component:centriole | cellular_component:cell-cell junction | cellular_component:adherens junction | cellular_component:cilium | biological_process:transmem…
196	NM_001621	AHR	73621	84910	83972	249737	264807	256743	1.34125	1.34125	0.042001	0.00564262	0.00756816	-0.00756816	aryl hydrocarbon receptor	biological_process:blood vessel development | molecular_function:DNA binding | molecular_function:sequence-specific DNA binding transcription factor activity | molecular_function:signal transducer activity | molecular_function:ligand-activated sequence-specific DNA binding RNA polymerase II transcription factor activity | molecular_function:protein binding | cellular_component:nucleus | cellular_…
197	NM_001622	AHSG	121425	66022	71438	275012	265999	270184	1.1657	1.1657	6.35904	0.0382231	0.0445566	-0.0445566	alpha-2-HS-glycoprotein	biological_process:skeletal system development | molecular_function:cysteine-type endopeptidase inhibitor activity | cellular_component:extracellular region | cellular_component:extracellular space | biological_process:pinocytosis | biological_process:acute-phase response | biological_process:negative regulation of endopeptidase activity | molecular_function:kinase inhibitor activity | biological…
9049	NM_003977	AIP	9568	9346	8798	248718	219102	183458	1.07117	1.07117	26.6081	0.145352	0.155696	-0.155696	aryl hydrocarbon receptor interacting protein	biological_process:protein folding | molecular_function:transcription coactivator activity | molecular_function:signal transducer activity | molecular_function:protein binding | cellular_component:nucleus | cellular_component:cytoplasm | cellular_component:cytosol | biological_process:protein targeting to mitochondrion | biological_process:signal transduction | molecular_function:transcription fa…
326	NM_000658	AIRE	45424	39306	40161	236673	228528	242635	2.96016	2.96016	0	0.000391643	0.00115933	-0.00115933	autoimmune regulator	molecular_function:chromatin binding | molecular_function:protein binding | cellular_component:nucleus | cellular_component:cytoplasm | biological_process:transcription, DNA-templated | biological_process:regulation of transcription, DNA-templated | biological_process:regulation of translation | biological_process:immune response | molecular_function:zinc ion binding | molecular_function:histone …
204	NM_001625	AK2	57249	56849	44380	212372	194028	188696	1.20993	1.20993	6.35904	0.0782232	0.0946444	-0.0946444	adenylate kinase 2	molecular_function:adenylate kinase activity | molecular_function:ATP binding | cellular_component:mitochondrial intermembrane space | biological_process:ADP biosynthetic process | biological_process:nucleobase-containing small molecule interconversion | biological_process:small molecule metabolic process | biological_process:AMP metabolic process | biological_process:nucleotide phosphorylation |…
50808	NM_016282	AK3L1	65647	50888	53105	245446	240398	241653	1.27356	1.27356	0.137128	0.00679602	0.00865517	-0.00865517	adenylate kinase 3	molecular_function:ATP binding | molecular_function:GTP binding | cellular_component:mitochondrion | cellular_component:mitochondrial matrix | biological_process:ADP biosynthetic process | biological_process:blood coagulation | biological_process:phosphorylation | biological_process:AMP metabolic process | biological_process:GTP metabolic process | biological_process:ITP metabolic process | biolo…
387851	NM_001002921	AK3L2	87208	77300	85892	245007	237156	247320	1.10814	1.10814	21.6065	0.125822	0.139428	-0.139428	#N/A	#N/A
26289	NM_012093	AK5	104390	86579	62507	242709	240837	234480	1.198	1.198	2.9389	0.0271965	0.0325813	-0.0325813	adenylate kinase 5	molecular_function:ATP binding | biological_process:nucleobase-containing compound metabolic process | biological_process:phosphorylation | molecular_function:nucleobase-containing compound kinase activity | molecular_function:adenylate kinase activity | molecular_function:nucleoside diphosphate kinase activity | cellular_component:cytoplasm | cellular_component:microtubule organizing center | ce…
11216	NM_007202	AKAP10	148880	132460	129527	229337	222180	217297	3.95767	3.95767	0	0.000925078	0.00366116	-0.00366116	A kinase (PRKA) anchor protein 10	cellular_component:cytoplasm | cellular_component:mitochondrion | cellular_component:cytosol | cellular_component:plasma membrane | biological_process:signal transduction | biological_process:blood coagulation | biological_process:termination of G-protein coupled receptor signaling pathway | biological_process:regulation of G-protein coupled receptor protein signaling pathway | biological_process…
11215	NM_016248	AKAP11	69467	65391	64647	171297	136806	145261	7.7636	7.7636	0	8.44e-05	0.000655248	-0.000655248	A kinase (PRKA) anchor protein 11	cellular_component:cytoplasm | cellular_component:microtubule organizing center | molecular_function:protein phosphatase 1 binding | biological_process:intracellular signal transduction | molecular_function:protein kinase A binding
10566	NM_006422	AKAP3	88065	93453	92488	233321	213170	232386	2.17884	2.17884	0	0.000263431	0.000573974	-0.000573974	A kinase (PRKA) anchor protein 3	cellular_component:acrosomal vesicle | molecular_function:protein binding | cellular_component:nucleus | biological_process:single fertilization | biological_process:acrosome reaction | cellular_component:sperm fibrous sheath | cellular_component:sperm principal piece | molecular_function:protein kinase A binding | biological_process:transmembrane receptor protein serine/threonine kinase signalin…
9472	NM_004274	AKAP6	37310	42293	48541	204306	192899	196291	1.15985	1.15985	2.9389	0.00913942	0.0106003	-0.0106003	A kinase (PRKA) anchor protein 6	biological_process:action potential | molecular_function:protein binding | cellular_component:nuclear envelope | cellular_component:cytoplasm | cellular_component:caveola | biological_process:protein targeting | molecular_function:adenylate cyclase binding | biological_process:regulation of protein kinase A signaling | biological_process:regulation of release of sequestered calcium ion into cytos…
9465	NM_004842	AKAP7	17159	17378	25865	120625	108933	111052	1.22551	1.22551	6.35904	0.0667185	0.0817639	-0.0817639	A kinase (PRKA) anchor protein 7	molecular_function:nucleotide binding | molecular_function:catalytic activity | molecular_function:protein binding | cellular_component:nucleus | cellular_component:cytosol | biological_process:biological_process | biological_process:metabolic process | molecular_function:protein kinase A binding | cellular_component:cytoplasm | molecular_function:protein kinase binding | molecular_function:prote…
10270	NM_005858	AKAP8	47319	50184	56235	176773	179779	191152	1.66872	1.66872	0	0.00188379	0.00314352	-0.00314352	A kinase (PRKA) anchor protein 8	cellular_component:nucleus | biological_process:mitotic nuclear division | biological_process:signal transduction | cellular_component:membrane | cellular_component:nuclear matrix | molecular_function:poly(A) RNA binding | molecular_function:poly(A) RNA binding | molecular_function:poly(A) RNA binding | molecular_function:poly(A) RNA binding | molecular_function:poly(A) RNA binding | molecular_fu…
26993	NM_014371	AKAP8L	113751	115038	111799	227958	223196	229329	2.80037	2.80037	0	1.39e-05	3.89251e-05	-3.89251e-05	A kinase (PRKA) anchor protein 8-like	molecular_function:DNA binding | cellular_component:nucleus | molecular_function:protein binding | cellular_component:cytoplasm | biological_process:biological_process | cellular_component:nuclear matrix | molecular_function:DEAD/H-box RNA helicase binding | molecular_function:poly(A) RNA binding | molecular_function:poly(A) RNA binding | molecular_function:poly(A) RNA binding | molecular_functio…
10142	NM_005751	AKAP9	62384	64385	65736	225381	240274	239624	1.26588	1.26588	1.21626	0.0240113	0.0303954	-0.0303954	A kinase (PRKA) anchor protein 9	biological_process:G2/M transition of mitotic cell cycle | molecular_function:receptor binding | molecular_function:protein binding | cellular_component:Golgi apparatus | cellular_component:centrosome | cellular_component:cytosol | cellular_component:cytoskeleton | biological_process:transport | biological_process:signal transduction | biological_process:synaptic transmission | cellular_component…
10327	NM_153326	AKR1A1	22883	28464	24377	257530	256645	258191	1.94599	1.94599	0	0.0015456	0.00300773	-0.00300773	aldo-keto reductase family 1, member A1 (aldehyde reductase)	biological_process:oxidation-reduction process | molecular_function:oxidoreductase activity | molecular_function:alditol:NADP+ 1-oxidoreductase activity | molecular_function:alditol:NADP+ 1-oxidoreductase activity | molecular_function:alditol:NADP+ 1-oxidoreductase activity | molecular_function:alditol:NADP+ 1-oxidoreductase activity | molecular_function:alditol:NADP+ 1-oxidoreductase activity | …
231	NM_001628	AKR1B1	38245	43730	52680	150760	143356	165986	1.92291	1.92291	0	0.00136388	0.00262261	-0.00262261	aldo-keto reductase family 1, member B1 (aldose reductase)	molecular_function:alditol:NADP+ 1-oxidoreductase activity | molecular_function:alditol:NADP+ 1-oxidoreductase activity | molecular_function:alditol:NADP+ 1-oxidoreductase activity | molecular_function:alditol:NADP+ 1-oxidoreductase activity | molecular_function:alditol:NADP+ 1-oxidoreductase activity | molecular_function:alditol:NADP+ 1-oxidoreductase activity | molecular_function:alditol:NADP+ …
57016	NM_020299	AKR1B10	16263	13756	9428	257442	214375	196498	1.36635	1.36635	11.095	0.130317	0.178059	-0.178059	aldo-keto reductase family 1, member B10 (aldose reductase)	biological_process:retinoid metabolic process | molecular_function:retinal dehydrogenase activity | molecular_function:aldo-keto reductase (NADP) activity | molecular_function:aldo-keto reductase (NADP) activity | molecular_function:aldo-keto reductase (NADP) activity | molecular_function:aldo-keto reductase (NADP) activity | molecular_function:aldo-keto reductase (NADP) activity | molecular_func…
1645	NM_001353	AKR1C1	41730	37942	46153	163775	162577	185217	1.20403	1.20403	11.095	0.108967	0.131199	-0.131199	aldo-keto reductase family 1, member C1	biological_process:retinoid metabolic process | molecular_function:alditol:NADP+ 1-oxidoreductase activity | molecular_function:alditol:NADP+ 1-oxidoreductase activity | molecular_function:alditol:NADP+ 1-oxidoreductase activity | molecular_function:alditol:NADP+ 1-oxidoreductase activity | molecular_function:alditol:NADP+ 1-oxidoreductase activity | molecular_function:alditol:NADP+ 1-oxidoreduct…
1109	NM_001818	AKR1C4	76713	69453	76042	257872	247520	252476	1.11657	1.11657	11.095	0.0222952	0.0248942	-0.0248942	aldo-keto reductase family 1, member C4	biological_process:retinoid metabolic process | molecular_function:retinal dehydrogenase activity | molecular_function:aldo-keto reductase (NADP) activity | molecular_function:aldo-keto reductase (NADP) activity | molecular_function:aldo-keto reductase (NADP) activity | molecular_function:aldo-keto reductase (NADP) activity | molecular_function:aldo-keto reductase (NADP) activity | molecular_func…
340811	NM_001007536	AKR1CL1	175483	149917	153328	243284	240678	242232	1.37047	1.37047	0	0.000492317	0.000674707	-0.000674707	aldo-keto reductase family 1, member C-like 1
83592	NM_001040177	AKR1CL2	79878	74362	88354	210196	198732	208845	2.15553	2.15553	0	0.000568724	0.0012259	-0.0012259	aldo-keto reductase family 1, member E2	molecular_function:oxidoreductase activity | biological_process:oxidation-reduction process | cellular_component:cytoplasm | molecular_function:1,5-anhydro-D-fructose reductase activity | cellular_component:extracellular vesicular exosome
6718	NM_005989	AKR1D1	55416	62602	72269	186114	193023	185168	1.24312	1.24312	1.21626	0.0287059	0.035685	-0.035685	aldo-keto reductase family 1, member D1	molecular_function:steroid binding | cellular_component:cytosol | biological_process:bile acid biosynthetic process | biological_process:cholesterol catabolic process | biological_process:digestion | biological_process:bile acid metabolic process | biological_process:C21-steroid hormone metabolic process | biological_process:androgen metabolic process | biological_process:bile acid catabolic proc…
8574	NM_003689	AKR7A2	158981	152712	150418	266338	269975	254392	1.42559	1.42559	0.443512	0.0333053	0.0474798	-0.0474798	aldo-keto reductase family 7, member A2 (aflatoxin aldehyde reductase)	molecular_function:alditol:NADP+ 1-oxidoreductase activity | molecular_function:alditol:NADP+ 1-oxidoreductase activity | molecular_function:alditol:NADP+ 1-oxidoreductase activity | molecular_function:alditol:NADP+ 1-oxidoreductase activity | molecular_function:alditol:NADP+ 1-oxidoreductase activity | molecular_function:alditol:NADP+ 1-oxidoreductase activity | molecular_function:alditol:NADP+ …
22977	NM_012067	AKR7A3	104147	127026	150262	205252	169472	205865	1.25597	1.25597	1.21626	0.016655	0.0209182	-0.0209182	aldo-keto reductase family 7, member A3 (aflatoxin aldehyde reductase)	molecular_function:aldo-keto reductase (NADP) activity | molecular_function:aldo-keto reductase (NADP) activity | molecular_function:aldo-keto reductase (NADP) activity | molecular_function:aldo-keto reductase (NADP) activity | molecular_function:aldo-keto reductase (NADP) activity | molecular_function:aldo-keto reductase (NADP) activity | molecular_function:aldo-keto reductase (NADP) activity | …
64400	NM_022476	AKTIP	27442	20691	17341	192222	188268	181704	1.41969	1.41969	0.042001	0.00857038	0.0121673	-0.0121673	AKT interacting protein	biological_process:metabolic process | molecular_function:acid-amino acid ligase activity | biological_process:positive regulation of protein phosphorylation | molecular_function:protein binding | cellular_component:plasma membrane | biological_process:apoptotic process | biological_process:endosome organization | biological_process:lysosome organization | biological_process:endosome to lysosome …
210	NM_000031	ALAD	19918	18264	10561	220802	194654	170253	2.01653	2.01653	0	0.0150373	0.0303232	-0.0303232	aminolevulinate dehydratase	molecular_function:porphobilinogen synthase activity | biological_process:porphyrin-containing compound biosynthetic process | molecular_function:metal ion binding | molecular_function:catalytic activity | cellular_component:nucleus | cellular_component:cytosol | biological_process:porphyrin-containing compound metabolic process | biological_process:protoporphyrinogen IX biosynthetic process | bi…
211	NM_000688	ALAS1	31613	27842	28132	252761	248473	250684	3.01931	3.01931	0	0.00283324	0.00855444	-0.00855444	aminolevulinate, delta-, synthase 1	molecular_function:5-aminolevulinate synthase activity | cellular_component:nucleus | cellular_component:cytoplasm | cellular_component:mitochondrion | cellular_component:mitochondrial matrix | biological_process:porphyrin-containing compound metabolic process | biological_process:protoporphyrinogen IX biosynthetic process | biological_process:heme biosynthetic process | molecular_function:pyrido…
212	NM_001037969	ALAS2	25396	19589	20078	250636	236071	239155	1.35554	1.35554	0.137128	0.0191536	0.0259635	-0.0259635	aminolevulinate, delta-, synthase 2	biological_process:response to hypoxia | molecular_function:5-aminolevulinate synthase activity | molecular_function:protein binding | cellular_component:mitochondrion | cellular_component:mitochondrial inner membrane | cellular_component:mitochondrial matrix | biological_process:porphyrin-containing compound metabolic process | biological_process:protoporphyrinogen IX biosynthetic process | biol…
213	NM_000477	ALB	12726	16206	11937	260666	250436	249894	1.02496	1.02496	33.6721	0.197545	0.202476	-0.202476	albumin	cellular_component:extracellular space | biological_process:transport | biological_process:retina homeostasis | biological_process:platelet degranulation | molecular_function:DNA binding | molecular_function:fatty acid binding | molecular_function:copper ion binding | molecular_function:protein binding | cellular_component:extracellular region | cellular_component:nucleus | biological_process:blo…
216	NM_000689	ALDH1A1	41969	43077	68018	200396	176363	204860	1.32348	1.32348	0.443512	0.0206516	0.027332	-0.027332	aldehyde dehydrogenase 1 family, member A1	molecular_function:oxidoreductase activity | biological_process:oxidation-reduction process | molecular_function:retinal dehydrogenase activity | molecular_function:aldehyde dehydrogenase (NAD) activity | molecular_function:aldehyde dehydrogenase (NAD) activity | molecular_function:aldehyde dehydrogenase (NAD) activity | molecular_function:aldehyde dehydrogenase (NAD) activity | molecular_functio…
220	NM_000693	ALDH1A3	77652	54003	75914	209365	185612	175205	1.10241	1.10241	21.6065	0.119282	0.131497	-0.131497	aldehyde dehydrogenase 1 family, member A3	molecular_function:oxidoreductase activity | biological_process:oxidation-reduction process | biological_process:metabolic process | molecular_function:aldehyde dehydrogenase NAD(P)+ activity | molecular_function:aldehyde dehydrogenase NAD(P)+ activity | molecular_function:aldehyde dehydrogenase NAD(P)+ activity | molecular_function:aldehyde dehydrogenase NAD(P)+ activity | molecular_function:ald…
10840	NM_012190	ALDH1L1	86372	76038	88570	184664	179916	189767	1.82247	1.82247	0	4.48e-05	8.16467e-05	-8.16467e-05	aldehyde dehydrogenase 1 family, member L1	molecular_function:methyltransferase activity | biological_process:biosynthetic process | molecular_function:hydroxymethyl-, formyl- and related transferase activity | biological_process:methylation | molecular_function:catalytic activity | biological_process:one-carbon metabolic process | biological_process:10-formyltetrahydrofolate catabolic process | molecular_function:formyltetrahydrofolate d…
217	NM_000690	ALDH2	39811	50074	50282	184620	195576	216887	1.30879	1.30879	0.443512	0.0147184	0.0192634	-0.0192634	aldehyde dehydrogenase 2 family (mitochondrial)	molecular_function:aldehyde dehydrogenase (NAD) activity | molecular_function:aldehyde dehydrogenase (NAD) activity | molecular_function:aldehyde dehydrogenase (NAD) activity | molecular_function:aldehyde dehydrogenase (NAD) activity | molecular_function:aldehyde dehydrogenase (NAD) activity | molecular_function:aldehyde dehydrogenase (NAD) activity | molecular_function:aldehyde dehydrogenase (NA…
221	NM_001030010	ALDH3B1	58222	74891	70494	228486	231478	228194	1.48787	1.48787	0	0.00200976	0.00299026	-0.00299026	aldehyde dehydrogenase 3 family, member B1	molecular_function:aldehyde dehydrogenase [NAD(P)+] activity | molecular_function:aldehyde dehydrogenase NAD(P)+ activity | molecular_function:aldehyde dehydrogenase NAD(P)+ activity | molecular_function:aldehyde dehydrogenase NAD(P)+ activity | molecular_function:aldehyde dehydrogenase NAD(P)+ activity | molecular_function:aldehyde dehydrogenase NAD(P)+ activity | molecular_function:aldehyde deh…
222	NM_001031615	ALDH3B2	81777	78761	80987	213359	194024	210871	2.1874	2.1874	0	0.000113281	0.000247791	-0.000247791	aldehyde dehydrogenase 3 family, member B2	molecular_function:oxidoreductase activity | biological_process:oxidation-reduction process | molecular_function:3-chloroallyl aldehyde dehydrogenase activity | molecular_function:aldehyde dehydrogenase NAD(P)+ activity | molecular_function:aldehyde dehydrogenase NAD(P)+ activity | molecular_function:aldehyde dehydrogenase NAD(P)+ activity | molecular_function:aldehyde dehydrogenase NAD(P)+ activ…
8659	NM_003748	ALDH4A1	59464	61578	61701	220298	217363	220141	1.24587	1.24587	1.21626	0.0133237	0.0165995	-0.0165995	aldehyde dehydrogenase 4 family, member A1	molecular_function:1-pyrroline-5-carboxylate dehydrogenase activity | molecular_function:aldehyde dehydrogenase (NAD) activity | molecular_function:aldehyde dehydrogenase (NAD) activity | molecular_function:aldehyde dehydrogenase (NAD) activity | molecular_function:aldehyde dehydrogenase (NAD) activity | molecular_function:aldehyde dehydrogenase (NAD) activity | molecular_function:aldehyde dehydr…
7915	NM_001080	ALDH5A1	26737	25536	21628	258263	264585	265791	1.42093	1.42093	0.443512	0.0295987	0.0420577	-0.0420577	aldehyde dehydrogenase 5 family, member A1	cellular_component:mitochondrion | molecular_function:succinate-semialdehyde dehydrogenase NAD(P)+ activity | molecular_function:succinate-semialdehyde dehydrogenase NAD(P)+ activity | molecular_function:succinate-semialdehyde dehydrogenase NAD(P)+ activity | molecular_function:succinate-semialdehyde dehydrogenase NAD(P)+ activity | molecular_function:succinate-semialdehyde dehydrogenase NAD(P)+ …
4329	NM_005589	ALDH6A1	15972	15458	12410	255383	238510	208096	1.49839	1.49839	0	0.00320368	0.00480038	-0.00480038	aldehyde dehydrogenase 6 family, member A1	molecular_function:methylmalonate-semialdehyde dehydrogenase (acylating) activity | molecular_function:methylmalonate-semialdehyde dehydrogenase (acylating) activity | molecular_function:methylmalonate-semialdehyde dehydrogenase (acylating) activity | molecular_function:methylmalonate-semialdehyde dehydrogenase (acylating) activity | molecular_function:methylmalonate-semialdehyde dehydrogenase (a…
501	NM_001182	ALDH7A1	39969	38327	47025	180504	192142	199220	1.22229	1.22229	1.21626	0.0201108	0.0245813	-0.0245813	aldehyde dehydrogenase 7 family, member A1	molecular_function:aldehyde dehydrogenase (NAD) activity | molecular_function:aldehyde dehydrogenase (NAD) activity | molecular_function:aldehyde dehydrogenase (NAD) activity | molecular_function:aldehyde dehydrogenase (NAD) activity | molecular_function:aldehyde dehydrogenase (NAD) activity | molecular_function:aldehyde dehydrogenase (NAD) activity | molecular_function:aldehyde dehydrogenase (NA…
64577	NM_170771	ALDH8A1	197911	152804	158026	273175	276005	273465	2.06548	2.06548	0	0.00318053	0.00656931	-0.00656931	aldehyde dehydrogenase 8 family, member A1	molecular_function:retinal dehydrogenase activity | cellular_component:intracellular | cellular_component:cytoplasm | biological_process:retinoic acid metabolic process | biological_process:retinal metabolic process | biological_process:oxidation-reduction process | cellular_component:extracellular vesicular exosome | molecular_function:oxidoreductase activity | biological_process:9-cis-retinoic …
229	NM_000035	ALDOB	36696	38695	42401	268289	258448	291118	3.25751	3.25751	0	0.000550212	0.00179232	-0.00179232	aldolase B, fructose-bisphosphate	molecular_function:fructose-bisphosphate aldolase activity | molecular_function:protein binding | cellular_component:microtubule organizing center | cellular_component:cytosol | biological_process:carbohydrate metabolic process | biological_process:fructose metabolic process | biological_process:fructose catabolic process | biological_process:glucose metabolic process | biological_process:glucone…
230	NM_005165	ALDOC	67012	89178	99701	157190	158878	161221	1.80896	1.80896	0.00681625	0.0183632	0.0332183	-0.0332183	aldolase C, fructose-bisphosphate	molecular_function:fructose-bisphosphate aldolase activity | biological_process:glycolytic process | molecular_function:protein binding | cellular_component:cytosol | cellular_component:cytoskeleton | biological_process:carbohydrate metabolic process | biological_process:fructose metabolic process | biological_process:glucose metabolic process | biological_process:gluconeogenesis | molecular_func…
11036	NM_006872	ALF	171933	117569	126931	242019	231931	238121	1.91347	1.91347	0	0.00541137	0.0103545	-0.0103545	general transcription factor IIA, 1-like	cellular_component:transcription factor TFIIA complex | biological_process:transcription initiation from RNA polymerase II promoter | molecular_function:DNA binding | molecular_function:transcription coactivator activity | biological_process:regulation of transcription, DNA-templated | biological_process:transcription from RNA polymerase II promoter | biological_process:cognition
56052	NM_019109	ALG1	11783	10234	9996	240251	212466	221287	1.07414	1.07414	21.6065	0.0801821	0.0861265	-0.0861265	ALG1, chitobiosyldiphosphodolichol beta-mannosyltransferase	biological_process:metabolic process | molecular_function:transferase activity, transferring glycosyl groups | biological_process:biosynthetic process | molecular_function:mannosyltransferase activity | molecular_function:chitobiosyldiphosphodolichol beta-mannosyltransferase activity | cellular_component:endoplasmic reticulum | cellular_component:endoplasmic reticulum membrane | biological_proces…
84920	NM_032834	ALG10	71087	75160	74232	288717	282149	289638	1.09472	1.09472	16.2507	0.0686535	0.0751562	-0.0751562	ALG10, alpha-1,2-glucosyltransferase	cellular_component:endoplasmic reticulum membrane | biological_process:dolichol-linked oligosaccharide biosynthetic process | cellular_component:integral component of membrane | molecular_function:transferase activity, transferring hexosyl groups | biological_process:protein N-linked glycosylation via asparagine | biological_process:post-translational protein modification | biological_process:cel…
79087	NM_024105	ALG12	183057	126748	135254	280774	278774	273734	1.42432	1.42432	0.443512	0.0462973	0.065942	-0.065942	ALG12, alpha-1,6-mannosyltransferase	molecular_function:alpha-1,6-mannosyltransferase activity | cellular_component:endoplasmic reticulum | cellular_component:endoplasmic reticulum membrane | biological_process:protein folding | biological_process:protein N-linked glycosylation | biological_process:dolichol-linked oligosaccharide biosynthetic process | cellular_component:integral component of membrane | biological_process:protein N-…
10195	NM_005787	ALG3	58928	58271	54700	192586	183662	187007	1.16282	1.16282	1.21626	0.00177587	0.00206502	-0.00206502	ALG3, alpha-1,3- mannosyltransferase	cellular_component:endoplasmic reticulum | biological_process:metabolic process | cellular_component:integral component of membrane | molecular_function:transferase activity, transferring hexosyl groups | molecular_function:alpha-1,3-mannosyltransferase activity | cellular_component:endoplasmic reticulum membrane | biological_process:protein glycosylation | biological_process:dolichol-linked olig…
29880	NM_013338	ALG5	32765	30748	36432	191876	191947	174139	1.41467	1.41467	0.137128	0.0172224	0.0243641	-0.0243641	ALG5, dolichyl-phosphate beta-glucosyltransferase	molecular_function:oligosaccharyl transferase activity | molecular_function:dolichyl-phosphate beta-glucosyltransferase activity | cellular_component:endoplasmic reticulum membrane | biological_process:protein glycosylation | biological_process:dolichol-linked oligosaccharide biosynthetic process | cellular_component:integral component of membrane | biological_process:protein N-linked glycosylati…
29929	NM_013339	ALG6	23601	17449	20923	222120	212005	218620	1.61736	1.61736	0	0.00498803	0.00806742	-0.00806742	ALG6, alpha-1,3-glucosyltransferase	cellular_component:cellular_component | cellular_component:endoplasmic reticulum membrane | biological_process:protein N-linked glycosylation | biological_process:dolichol-linked oligosaccharide biosynthetic process | cellular_component:integral component of membrane | biological_process:protein N-linked glycosylation via asparagine | biological_process:post-translational protein modification | b…
79053	NM_024079	ALG8	18192	21602	29895	261594	254952	258146	1.63843	1.63843	0	0.00987869	0.0161856	-0.0161856	ALG8, alpha-1,3-glucosyltransferase	molecular_function:transferase activity, transferring hexosyl groups | cellular_component:endoplasmic reticulum membrane | biological_process:metabolic process | molecular_function:alpha-1,3-mannosyltransferase activity | biological_process:protein N-linked glycosylation | biological_process:dolichol-linked oligosaccharide biosynthetic process | cellular_component:integral component of membrane |…
55821	NM_018436	ALLC	49092	41522	46859	171321	169127	172229	1.35275	1.35275	1.21626	0.0475273	0.0642927	-0.0642927	allantoicase	biological_process:allantoin catabolic process | molecular_function:allantoicase activity
7840	NM_015120	ALMS1	30966	29222	37444	157427	163027	162485	1.15006	1.15006	6.35904	0.0398495	0.0458292	-0.0458292	Alstrom syndrome 1	cellular_component:cytoplasm | biological_process:endosomal transport | biological_process:regulation of stress fiber assembly | biological_process:G2/M transition of mitotic cell cycle | cellular_component:spindle pole | molecular_function:molecular_function | molecular_function:protein binding | cellular_component:centrosome | cellular_component:cytosol | cellular_component:cilium | cellular_co…
239	NM_000697	ALOX12	52848	58163	106024	231350	221081	242403	1.47249	1.47249	0	0.000378274	0.000557006	-0.000557006	arachidonate 12-lipoxygenase	molecular_function:arachidonate 12-lipoxygenase activity | molecular_function:iron ion binding | molecular_function:protein binding | cellular_component:cytoplasm | cellular_component:cytosol | biological_process:cellular component movement | biological_process:positive regulation of cell proliferation | biological_process:negative regulation of muscle cell apoptotic process | cellular_component:…
246	NM_001140	ALOX15	38911	38249	49304	166604	157914	155960	2.06825	2.06825	0	0.00140032	0.00289622	-0.00289622	arachidonate 15-lipoxygenase	molecular_function:iron ion binding | molecular_function:oxidoreductase activity, acting on single donors with incorporation of molecular oxygen, incorporation of two atoms of oxygen | biological_process:oxidation-reduction process | biological_process:ossification | biological_process:negative regulation of adaptive immune response | molecular_function:arachidonate 12-lipoxygenase activity | mol…
247	NM_001141	ALOX15B	89348	89837	104569	223904	223500	224849	1.69782	1.69782	0	0.000571273	0.00096992	-0.00096992	arachidonate 15-lipoxygenase, type B	molecular_function:iron ion binding | molecular_function:calcium ion binding | cellular_component:intracellular | cellular_component:nucleus | cellular_component:cytoplasm | cellular_component:cytosol | cellular_component:cytoskeleton | cellular_component:plasma membrane | biological_process:lipid metabolic process | biological_process:apoptotic process | biological_process:negative regulation of…
240	NM_000698	ALOX5	10908	12044	12188	194934	185767	178716	1.36445	1.36445	1.21626	0.0559921	0.0763984	-0.0763984	arachidonate 5-lipoxygenase	molecular_function:arachidonate 5-lipoxygenase activity | molecular_function:iron ion binding | molecular_function:protein binding | cellular_component:extracellular space | cellular_component:nuclear envelope | cellular_component:nuclear envelope lumen | cellular_component:cytosol | biological_process:leukotriene metabolic process | cellular_component:nuclear matrix | biological_process:arachido…
241	NM_001629	ALOX5AP	30093	19127	21927	293638	297627	290189	1.47479	1.47479	0.137128	0.0306768	0.0452418	-0.0452418	arachidonate 5-lipoxygenase-activating protein	molecular_function:protein binding | cellular_component:nuclear envelope | cellular_component:endoplasmic reticulum | cellular_component:endoplasmic reticulum membrane | biological_process:leukotriene metabolic process | molecular_function:enzyme activator activity | cellular_component:integral component of membrane | biological_process:arachidonic acid metabolic process | biological_process:leuk…
59344	NM_021628	ALOXE3	31839	20784	22775	271020	280467	277510	1.66373	1.66373	0.00681625	0.0143682	0.0239049	-0.0239049	arachidonate lipoxygenase 3	molecular_function:oxidoreductase activity, acting on single donors with incorporation of molecular oxygen, incorporation of two atoms of oxygen | molecular_function:metal ion binding | biological_process:oxidation-reduction process | molecular_function:iron ion binding | molecular_function:protein binding | cellular_component:cytoplasm | biological_process:sphingolipid metabolic process | biolog…
51146	NM_016161	ALPHA4GNT	110866	108451	101153	231694	231544	223641	1.56783	1.56783	0	0.00677244	0.0106181	-0.0106181	alpha-1,4-N-acetylglucosaminyltransferase	cellular_component:Golgi membrane | cellular_component:Golgi stack | biological_process:carbohydrate metabolic process | molecular_function:acetylglucosaminyltransferase activity | molecular_function:galactosyltransferase activity | biological_process:glycoprotein biosynthetic process | cellular_component:integral component of membrane | biological_process:negative regulation of epithelial cell p…
57679	NM_020919	ALS2	112616	103406	97353	200885	194165	202108	1.03313	1.03313	30.6466	0.174285	0.180059	-0.180059	amyotrophic lateral sclerosis 2 (juvenile)	cellular_component:ruffle | molecular_function:Ran guanyl-nucleotide exchange factor activity | molecular_function:protein binding | cellular_component:early endosome | cellular_component:centrosome | cellular_component:cytosol | biological_process:endosome organization | biological_process:cell death | molecular_function:Rab guanyl-nucleotide exchange factor activity | molecular_function:Rab GTP…
150864	NM_173511	ALS2CR13	35898	38481	48632	194956	202519	208305	1.52852	1.52852	0	0.00131337	0.00200752	-0.00200752	family with sequence similarity 117, member B
130026	NM_178231	ALS2CR15	215919	209366	143783	266524	248270	202199	1.15092	1.15092	6.35904	0.0338906	0.0390053	-0.0390053	islet cell autoantigen 1,69kDa-like	molecular_function:protein domain specific binding
117583	NM_205863	ALS2CR19	218943	213765	185338	307151	287013	306442	1.0057	1.0057	37.008	0.230693	0.232008	-0.232008	par-3 family cell polarity regulator beta	cellular_component:tight junction | biological_process:cell cycle | cellular_component:endomembrane system | biological_process:cell division | molecular_function:protein binding
55437	NM_018571	ALS2CR2	128292	120560	96748	256685	244364	256867	1.16021	1.16021	2.9389	0.0158465	0.0183852	-0.0183852	STE20-related kinase adaptor beta	molecular_function:protein kinase activity | molecular_function:ATP binding | biological_process:protein phosphorylation | molecular_function:transferase activity, transferring phosphorus-containing groups | molecular_function:protein binding | cellular_component:nucleus | cellular_component:cytoplasm | cellular_component:cytosol | biological_process:protein export from nucleus | biological_proce…
79800	NM_001104586	ALS2CR8	15775	18974	20725	242237	223239	218655	2.01602	2.01602	0	0.00292506	0.00589697	-0.00589697	calcium responsive transcription factor	molecular_function:DNA binding | molecular_function:sequence-specific DNA binding transcription factor activity | cellular_component:nucleus | biological_process:transcription, DNA-templated | biological_process:cellular response to potassium ion | biological_process:positive regulation of transcription from RNA polymerase II promoter in response to calcium ion | biological_process:cellular respo…
257	NM_006492	ALX3	27718	26535	30746	136224	126189	134338	1.50517	1.50517	0	0.000874445	0.00131619	-0.00131619	ALX homeobox 3	molecular_function:sequence-specific DNA binding transcription factor activity | cellular_component:nucleus | biological_process:transcription, DNA-templated | biological_process:regulation of transcription, DNA-templated | biological_process:regulation of apoptotic process | biological_process:embryonic hindlimb morphogenesis | biological_process:pattern specification process | biological_proces…
60529	NM_021926	ALX4	33320	35671	58440	213595	196891	222700	1.34378	1.34378	0.042001	0.00396867	0.00533303	-0.00533303	ALX homeobox 4	biological_process:skeletal system development | biological_process:hair follicle development | molecular_function:DNA binding | cellular_component:nucleus | biological_process:transcription, DNA-templated | molecular_function:protein binding | molecular_function:sequence-specific DNA binding transcription factor activity | biological_process:regulation of transcription from RNA polymerase II pro…
83650	NM_054028	AMAC1L2	90531	72173	84735	258601	255862	253975	1.03327	1.03327	33.6721	0.190863	0.197212	-0.197212	solute carrier family 35, member G5	cellular_component:integral component of membrane
23600	NM_203382	AMACR	19663	19885	19866	227032	215965	215006	1.5501	1.5501	0	0.00080699	0.00125092	-0.00125092	alpha-methylacyl-CoA racemase	molecular_function:receptor binding | cellular_component:cytoplasm | cellular_component:mitochondrion | cellular_component:peroxisome | cellular_component:peroxisomal matrix | biological_process:bile acid biosynthetic process | molecular_function:alpha-methylacyl-CoA racemase activity | biological_process:bile acid metabolic process | biological_process:fatty acid beta-oxidation using acyl-CoA ox…
259	NM_001633	AMBP	80258	81474	67262	272387	257508	279123	5.15699	5.15699	0	0.000414109	0.00213555	-0.00213555	alpha-1-microglobulin/bikunin precursor	molecular_function:serine-type endopeptidase inhibitor activity | molecular_function:protein binding | cellular_component:extracellular region | cellular_component:extracellular space | cellular_component:plasma membrane | biological_process:cell adhesion | biological_process:female pregnancy | biological_process:negative regulation of endopeptidase activity | biological_process:viral process | b…
269	NM_020547	AMHR2	58354	59068	58282	254643	254269	253159	1.20087	1.20087	1.21626	0.0124229	0.0149183	-0.0149183	anti-Mullerian hormone receptor, type II	molecular_function:receptor signaling protein serine/threonine kinase activity | molecular_function:ATP binding | biological_process:protein phosphorylation | biological_process:signal transduction by phosphorylation | biological_process:Mullerian duct regression | molecular_function:receptor activity | molecular_function:protein binding | biological_process:sex differentiation | molecular_functi…
9949	NM_001025580	AMMECR1	122411	61260	60981	246797	249573	245055	1.22977	1.22977	0.137128	0.0012398	0.00152466	-0.00152466	Alport syndrome, mental retardation, midface hypoplasia and elliptocytosis chromosomal region gene 1	molecular_function:molecular_function | molecular_function:protein binding | cellular_component:cellular_component | biological_process:biological_process
81693	NM_030943	AMN	64845	61079	57370	276280	262239	242795	1.25017	1.25017	2.9389	0.0354628	0.0443346	-0.0443346	amnion associated transmembrane protein	molecular_function:receptor binding | cellular_component:extracellular space | cellular_component:plasma membrane | biological_process:vitamin metabolic process | biological_process:water-soluble vitamin metabolic process | biological_process:receptor-mediated endocytosis | biological_process:multicellular organismal development | biological_process:cobalamin metabolic process | cellular_componen…
154796	NM_133265	AMOT	95232	61210	58946	260226	273531	261366	1.04274	1.04274	30.6466	0.157282	0.164004	-0.164004	angiomotin	cellular_component:stress fiber | cellular_component:ruffle | molecular_function:receptor activity | molecular_function:protein binding | cellular_component:cytoplasm | cellular_component:cytosol | cellular_component:actin filament | cellular_component:tight junction | biological_process:cell-cell junction assembly | cellular_component:external side of plasma membrane | cellular_component:cell su…
51421	NM_016201	AMOTL2	270942	250364	192068	305165	309917	335481	1.18034	1.18034	2.9389	0.0138944	0.0164	-0.0164	angiomotin like 2	molecular_function:protein binding | cellular_component:cytosol | biological_process:Wnt signaling pathway | biological_process:hippo signaling | cellular_component:recycling endosome | cellular_component:cytoplasmic vesicle | molecular_function:identical protein binding | cellular_component:tight junction | cellular_component:apical plasma membrane
270	NM_000036	AMPD1	139688	109707	135615	281864	280916	275046	1.53738	1.53738	0	0.00565202	0.00868932	-0.00868932	adenosine monophosphate deaminase 1	molecular_function:AMP deaminase activity | cellular_component:cytosol | biological_process:purine nucleobase metabolic process | biological_process:IMP salvage | biological_process:purine-containing compound salvage | biological_process:small molecule metabolic process | molecular_function:metal ion binding | biological_process:nucleobase-containing small molecule metabolic process | biological_…
271	NM_203404	AMPD2	116200	140935	150506	202131	207056	209273	1.19158	1.19158	2.9389	0.020972	0.0249898	-0.0249898	adenosine monophosphate deaminase 2	molecular_function:AMP deaminase activity | biological_process:IMP biosynthetic process | cellular_component:cellular_component | cellular_component:cytosol | biological_process:purine nucleobase metabolic process | biological_process:IMP salvage | biological_process:purine-containing compound salvage | biological_process:small molecule metabolic process | molecular_function:metal ion binding | b…
272	NM_001025389	AMPD3	50259	54513	72935	254245	248092	247770	1.28638	1.28638	0.042001	0.000536635	0.000690319	-0.000690319	adenosine monophosphate deaminase 3	molecular_function:AMP deaminase activity | biological_process:IMP biosynthetic process | cellular_component:cytosol | biological_process:purine nucleobase metabolic process | biological_process:AMP catabolic process | biological_process:IMP salvage | biological_process:purine-containing compound salvage | biological_process:small molecule metabolic process | molecular_function:metal ion binding …
275	NM_000481	AMT	45958	51275	43132	174905	156840	160228	1.02309	1.02309	33.6721	0.203331	0.208027	-0.208027	aminomethyltransferase	molecular_function:aminomethyltransferase activity | biological_process:glycine catabolic process | cellular_component:mitochondrion | molecular_function:transaminase activity | biological_process:methylation | cellular_component:cytoplasm
10393	NM_014885	ANAPC10	37867	38339	32312	259633	247982	263136	2.00254	2.00254	0	0.00739142	0.0148016	-0.0148016	anaphase promoting complex subunit 10	biological_process:G2/M transition of mitotic cell cycle | biological_process:mitotic anaphase | molecular_function:ubiquitin-protein transferase activity | cellular_component:nucleoplasm | cellular_component:anaphase-promoting complex | cellular_component:cytosol | biological_process:ubiquitin-dependent protein catabolic process | biological_process:mitotic nuclear division | biological_process:…
29882	NM_013366	ANAPC2	86350	88225	116678	200322	205544	201535	2.61263	2.61263	0	1.99e-05	5.19914e-05	-5.19914e-05	anaphase promoting complex subunit 2	biological_process:regulation of cyclin-dependent protein serine/threonine kinase activity | biological_process:mitotic cell cycle | molecular_function:ubiquitin-protein transferase activity | cellular_component:nucleoplasm | cellular_component:anaphase-promoting complex | cellular_component:cytosol | biological_process:ubiquitin-dependent protein catabolic process | biological_process:mitotic nu…
29945	NM_013367	ANAPC4	78122	80634	79945	155720	148768	139988	2.63485	2.63485	0	0.00338719	0.00892476	-0.00892476	anaphase promoting complex subunit 4	cellular_component:anaphase-promoting complex | biological_process:regulation of mitotic metaphase/anaphase transition | biological_process:anaphase-promoting complex-dependent proteasomal ubiquitin-dependent protein catabolic process | biological_process:G2/M transition of mitotic cell cycle | biological_process:mitotic anaphase | molecular_function:ubiquitin-protein transferase activity | molec…
51433	NM_016237	ANAPC5	88965	82049	124883	208099	219737	211589	2.47925	2.47925	0	0.00069671	0.00172732	-0.00172732	anaphase promoting complex subunit 5	biological_process:G2/M transition of mitotic cell cycle | biological_process:mitotic anaphase | molecular_function:ubiquitin-protein transferase activity | cellular_component:nucleus | cellular_component:nucleoplasm | cellular_component:anaphase-promoting complex | cellular_component:cytosol | biological_process:ubiquitin-dependent protein catabolic process | biological_process:mitotic nuclear d…
51434	NM_016238	ANAPC7	115637	93456	91818	221634	244911	220795	1.37258	1.37258	0.137128	0.011388	0.015631	-0.015631	anaphase promoting complex subunit 7	biological_process:mitotic cell cycle | cellular_component:nucleus | cellular_component:nucleoplasm | cellular_component:anaphase-promoting complex | cellular_component:cytosol | biological_process:mitotic nuclear division | biological_process:mitotic spindle assembly checkpoint | molecular_function:protein phosphatase binding | biological_process:anaphase-promoting complex-dependent proteasomal …
284	NM_001146	ANGPT1	134863	138320	154945	263371	269534	255395	1.3226	1.3226	0.443512	0.0225821	0.0298672	-0.0298672	angiopoietin 1	molecular_function:receptor tyrosine kinase binding | biological_process:Tie signaling pathway | biological_process:sprouting angiogenesis | biological_process:positive regulation of receptor internalization | cellular_component:extracellular region | cellular_component:extracellular space | cellular_component:plasma membrane | cellular_component:microvillus | biological_process:negative regulati…
285	NM_001147	ANGPT2	29101	21472	36143	147227	146939	144038	1.08556	1.08556	21.6065	0.123685	0.134268	-0.134268	angiopoietin 2	molecular_function:receptor binding | molecular_function:protein binding | cellular_component:extracellular region | cellular_component:extracellular space | biological_process:signal transduction | biological_process:blood coagulation | molecular_function:receptor tyrosine kinase binding | biological_process:negative regulation of blood vessel endothelial cell migration | molecular_function:meta…
9068	NM_004673	ANGPTL1	89428	84215	117460	213233	239809	239418	1.81615	1.81615	0	0.00128403	0.00233198	-0.00233198	angiopoietin-like 1	cellular_component:extracellular space | cellular_component:extracellular vesicular exosome | molecular_function:receptor binding | biological_process:transmembrane receptor protein tyrosine kinase signaling pathway
23452	NM_012098	ANGPTL2	201290	226209	221943	225414	234902	245097	1.11698	1.11698	11.095	0.015046	0.0168062	-0.0168062	angiopoietin-like 2	molecular_function:receptor binding | cellular_component:extracellular space | biological_process:multicellular organismal development | cellular_component:extracellular vesicular exosome
83854	NM_031917	ANGPTL6	102277	89366	82951	258333	267099	268245	1.20035	1.20035	6.35904	0.0521371	0.0625829	-0.0625829	angiopoietin-like 6	biological_process:angiogenesis | cellular_component:extracellular region | biological_process:cell differentiation | cellular_component:secretory granule
286	NM_020480	ANK1	90003	94835	87486	270513	246980	247187	1.62315	1.62315	0	0.000791281	0.00128437	-0.00128437	ankyrin 1, erythrocytic	molecular_function:structural molecule activity | molecular_function:structural constituent of cytoskeleton | molecular_function:protein binding | cellular_component:cytosol | cellular_component:plasma membrane | biological_process:exocytosis | biological_process:ER to Golgi vesicle-mediated transport | biological_process:cytoskeleton organization | biological_process:signal transduction | biolog…
288	NM_001149	ANK3	31457	38210	58773	193086	186742	183081	1.51848	1.51848	0	0.000792751	0.00120378	-0.00120378	ankyrin 3, node of Ranvier (ankyrin G)	biological_process:mitotic cytokinesis | molecular_function:structural constituent of cytoskeleton | molecular_function:protein binding | cellular_component:lysosome | cellular_component:endoplasmic reticulum | cellular_component:Golgi apparatus | cellular_component:plasma membrane | biological_process:plasma membrane organization | biological_process:cytoskeletal anchoring at plasma membrane | b…
56172	NM_054027	ANKH	38104	38900	39742	171794	152577	159727	1.33951	1.33951	1.21626	0.0465561	0.0623625	-0.0623625	ANKH inorganic pyrophosphate transport regulator	molecular_function:phosphate ion transmembrane transporter activity | biological_process:skeletal system development | molecular_function:inorganic phosphate transmembrane transporter activity | cellular_component:plasma membrane | cellular_component:integral component of plasma membrane | biological_process:locomotory behavior | cellular_component:integral component of membrane | cellular_compon…
54467	NM_019004	ANKIB1	27032	29828	24574	189760	199043	190820	2.13655	2.13655	0	0.00103943	0.00222079	-0.00222079	ankyrin repeat and IBR domain containing 1	molecular_function:protein binding | molecular_function:zinc ion binding
255239	NM_178510	ANKK1	227595	215430	217458	262847	248642	253548	1.10116	1.10116	21.6065	0.115416	0.127092	-0.127092	ankyrin repeat and kinase domain containing 1	molecular_function:protein serine/threonine kinase activity | molecular_function:ATP binding | biological_process:protein phosphorylation | molecular_function:protein kinase activity | molecular_function:protein binding | molecular_function:transferase activity, transferring phosphorus-containing groups | molecular_function:protein tyrosine kinase activity
51281	NM_017844	ANKMY1	92863	97814	109300	254757	256790	260304	1.67095	1.67095	0	0.000126382	0.000211178	-0.000211178	ankyrin repeat and MYND domain containing 1	molecular_function:metal ion binding | molecular_function:protein binding
57037	NM_020319	ANKMY2	82397	78337	71617	232203	249807	212013	2.59353	2.59353	0	0.000847615	0.00219832	-0.00219832	ankyrin repeat and MYND domain containing 2	cellular_component:cilium | molecular_function:metal ion binding | molecular_function:protein binding
27063	NM_014391	ANKRD1	113197	117118	129696	182644	180238	183191	1.16285	1.16285	2.9389	0.0166549	0.0193671	-0.0193671	ankyrin repeat domain 1 (cardiac muscle)	molecular_function:RNA polymerase II transcription factor binding | molecular_function:RNA polymerase II transcription coactivator activity | molecular_function:p53 binding | molecular_function:DNA binding | molecular_function:transcription corepressor activity | molecular_function:protein binding | cellular_component:nucleus | cellular_component:nucleoplasm | cellular_component:cytoplasm | cellu…
55608	NM_017664	ANKRD10	129192	127059	104449	224766	220310	213372	1.02146	1.02146	33.6721	0.181352	0.185244	-0.185244	ankyrin repeat domain 10	molecular_function:protein binding
29123	NM_013275	ANKRD11	50540	64276	76987	276965	273843	277438	1.43901	1.43901	0.042001	0.010642	0.0153138	-0.0153138	ankyrin repeat domain 11	cellular_component:nucleus | cellular_component:cytoplasm | cellular_component:plasma membrane | biological_process:odontogenesis of dentin-containing tooth | biological_process:skeletal system morphogenesis | biological_process:face morphogenesis | molecular_function:protein binding | biological_process:multicellular organism growth | biological_process:in utero embryonic development | biologica…
26057	NM_198889	ANKRD17	61638	55369	60433	204329	194169	190779	1.78265	1.78265	0	0.000172838	0.00030811	-0.00030811	ankyrin repeat domain 17	cellular_component:nucleus | cellular_component:cytoplasm | cellular_component:membrane | biological_process:viral process | molecular_function:poly(A) RNA binding | molecular_function:poly(A) RNA binding | molecular_function:poly(A) RNA binding | molecular_function:poly(A) RNA binding | molecular_function:poly(A) RNA binding | molecular_function:poly(A) RNA binding | molecular_function:poly(A) R…
84210	NM_032250	ANKRD20A	111746	115587	118641	195420	185096	202617	2.14454	2.14454	0	4.07e-05	8.72827e-05	-8.72827e-05	ankyrin repeat domain 20 family, member A1	cellular_component:plasma membrane | molecular_function:protein binding
170961	NM_133475	ANKRD24	97828	105173	94229	270075	271222	284803	1.16213	1.16213	6.35904	0.0480088	0.0557924	-0.0557924	ankyrin repeat domain 24	molecular_function:protein binding
22852	NM_014915	ANKRD26	102111	115134	124783	217332	216757	223532	1.01376	1.01376	36.0237	0.217743	0.22074	-0.22074	ankyrin repeat domain 26	cellular_component:centrosome | molecular_function:protein binding | molecular_function:transferase activity | molecular_function:cofactor binding
84079	NM_032139	ANKRD27	29525	35667	34459	212281	210861	220789	1.02508	1.02508	33.6721	0.20991	0.215175	-0.215175	ankyrin repeat domain 27 (VPS9 domain)	molecular_function:guanyl-nucleotide exchange factor activity | molecular_function:GTPase activator activity | molecular_function:protein binding | cellular_component:cytoplasm | cellular_component:lysosome | cellular_component:early endosome | cellular_component:membrane | biological_process:positive regulation of GTPase activity | biological_process:early endosome to late endosome transport
23243	NM_015199	ANKRD28	117037	121941	136231	258505	270144	288753	2.20761	2.20761	0	0.00135388	0.00298884	-0.00298884	ankyrin repeat domain 28	molecular_function:protein binding | cellular_component:nucleoplasm
91074	NM_052997	ANKRD30A	78612	68699	65750	167555	158892	152323	2.54774	2.54774	0	0.00164014	0.00417864	-0.00417864	ankyrin repeat domain 30A	molecular_function:protein binding | molecular_function:DNA binding | molecular_function:sequence-specific DNA binding transcription factor activity | cellular_component:nucleus | biological_process:regulation of transcription, DNA-templated
284615	NM_001039888	ANKRD34	134044	75024	64217	266677	264303	265705	1.23531	1.23531	0.042001	0.000169912	0.000209895	-0.000209895	ankyrin repeat domain 34A	cellular_component:cytoplasm | molecular_function:protein binding
23294	NM_015245	ANKS1	158330	164769	155686	166584	178703	193971	1.4158	1.4158	0	0.000756878	0.00107159	-0.00107159	ankyrin repeat and sterile alpha motif domain containing 1A	molecular_function:protein binding | cellular_component:nucleus | cellular_component:cytoplasm | biological_process:substrate-dependent cell migration | biological_process:neuron remodeling | cellular_component:neuron projection | biological_process:ephrin receptor signaling pathway | molecular_function:ephrin receptor binding
54443	NM_018685	ANLN	123886	117256	111334	203249	189824	205610	1.23795	1.23795	0.137128	0.000811824	0.001005	-0.001005	anillin, actin binding protein	biological_process:mitotic cytokinesis | biological_process:septin ring assembly | molecular_function:actin binding | cellular_component:nucleus | cellular_component:actomyosin contractile ring | biological_process:mitotic nuclear division | biological_process:regulation of exit from mitosis | cellular_component:actin cytoskeleton | cellular_component:intracellular membrane-bounded organelle | bi…
8125	NM_006305	ANP32A	169384	135401	119297	248118	250244	245912	1.01995	1.01995	36.0237	0.211336	0.215552	-0.215552	acidic (leucine-rich) nuclear phosphoprotein 32 family, member A	molecular_function:protein binding | cellular_component:nucleus | cellular_component:nucleoplasm | cellular_component:cytoplasm | cellular_component:endoplasmic reticulum | biological_process:transcription, DNA-templated | biological_process:regulation of transcription, DNA-templated | biological_process:nucleocytoplasmic transport | biological_process:gene expression | biological_process:RNA met…
10541	NM_006401	ANP32B	231393	222499	188210	252395	254040	250502	1.49043	1.49043	0	6.73e-05	0.000100306	-0.000100306	acidic (leucine-rich) nuclear phosphoprotein 32 family, member B	cellular_component:nucleus | cellular_component:cytoplasm | biological_process:nucleosome assembly | biological_process:activation of cysteine-type endopeptidase activity involved in apoptotic process | molecular_function:histone binding | biological_process:negative regulation of cell differentiation | biological_process:positive regulation of protein export from nucleus | cellular_component:ext…
23520	NM_012403	ANP32C	232424	229156	181156	269779	259039	261761	1.32911	1.32911	0	0.000341689	0.000454141	-0.000454141	#N/A	#N/A
81611	NM_030920	ANP32E	54969	56797	59026	238364	240782	245948	1.41128	1.41128	0	0.00208956	0.00294896	-0.00294896	acidic (leucine-rich) nuclear phosphoprotein 32 family, member E	cellular_component:Swr1 complex | cellular_component:nucleus | cellular_component:cytoplasmic membrane-bounded vesicle | molecular_function:phosphatase inhibitor activity | molecular_function:histone binding | biological_process:negative regulation of catalytic activity | biological_process:histone exchange | molecular_function:protein binding
290	NM_001150	ANPEP	18982	17089	12787	205846	216546	225129	1.16819	1.16819	21.6065	0.151552	0.177042	-0.177042	alanyl (membrane) aminopeptidase	biological_process:proteolysis | biological_process:angiogenesis | molecular_function:virus receptor activity | biological_process:angiotensin maturation | molecular_function:aminopeptidase activity | cellular_component:extracellular space | cellular_component:lysosomal membrane | cellular_component:endoplasmic reticulum-Golgi intermediate compartment | cellular_component:cytosol | cellular_compo…
84168	NM_018153	ANTXR1	185663	170068	157614	285760	284350	298444	1.33478	1.33478	0	0.000251516	0.000335717	-0.000335717	anthrax toxin receptor 1	molecular_function:transmembrane signaling receptor activity | molecular_function:protein binding | molecular_function:collagen binding | biological_process:signal transduction | cellular_component:integral component of membrane | cellular_component:lamellipodium membrane | cellular_component:filopodium membrane | biological_process:actin cytoskeleton reorganization | biological_process:substrate…
118429	NM_058172	ANTXR2	131558	130745	117524	260216	245404	264477	1.12565	1.12565	16.2507	0.0789224	0.0888387	-0.0888387	anthrax toxin receptor 2	molecular_function:receptor activity | cellular_component:integral component of membrane | molecular_function:protein binding | cellular_component:extracellular region | cellular_component:endoplasmic reticulum membrane | cellular_component:plasma membrane | molecular_function:metal ion binding | biological_process:reproductive process
302	NM_004039	ANXA2	161800	130751	195319	227864	210343	207986	1.01117	1.01117	37.008	0.229689	0.232255	-0.232255	annexin A2	molecular_function:phospholipase inhibitor activity | molecular_function:calcium ion binding | molecular_function:calcium-dependent phospholipid binding | molecular_function:cytoskeletal protein binding | biological_process:negative regulation of catalytic activity | biological_process:angiogenesis | biological_process:membrane raft assembly | molecular_function:phosphatidylinositol-4,5-bisphosph…
306	NM_005139	ANXA3	100624	103655	108553	306062	312954	304680	1.30286	1.30286	0.137128	0.0115827	0.0150906	-0.0150906	annexin A3	molecular_function:phospholipase inhibitor activity | molecular_function:calcium ion binding | molecular_function:calcium-dependent phospholipid binding | cellular_component:cytoplasm | biological_process:negative regulation of catalytic activity | cellular_component:plasma membrane | biological_process:phagocytosis | biological_process:positive regulation of endothelial cell migration | molecula…
309	NM_004033	ANXA6	260053	257170	247937	264657	273730	274091	1.05681	1.05681	21.6065	0.00868732	0.00918083	-0.00918083	annexin A6	molecular_function:calcium ion binding | molecular_function:calcium-dependent phospholipid binding | molecular_function:protein binding | molecular_function:GTP binding | cellular_component:lysosomal membrane | molecular_function:ligand-gated ion channel activity | molecular_function:cholesterol binding | cellular_component:late endosome membrane | biological_process:ion transmembrane transport |…
310	NM_001156	ANXA7	124941	121234	116456	205713	190104	178390	1.03897	1.03897	30.6466	0.12593	0.130838	-0.130838	annexin A7	molecular_function:calcium ion binding | molecular_function:calcium-dependent phospholipid binding | molecular_function:integrin binding | molecular_function:protein binding | cellular_component:nucleus | cellular_component:endoplasmic reticulum membrane | biological_process:autophagy | biological_process:negative regulation of gene expression | biological_process:epithelial cell differentiation …
244	NM_001630	ANXA8	41352	44520	93477	209261	198091	228586	1.35338	1.35338	1.21626	0.0526585	0.071267	-0.071267	#N/A	#N/A
8416	NM_003568	ANXA9	50990	48588	52152	108861	107785	97100	1.75632	1.75632	0	0.00169248	0.00297253	-0.00297253	annexin A9	molecular_function:phosphatidylserine binding | molecular_function:calcium ion binding | molecular_function:protein binding | molecular_function:phospholipid binding | molecular_function:calcium-dependent phospholipid binding | cellular_component:cytosol | biological_process:synaptic transmission | cellular_component:cell surface | molecular_function:acetylcholine receptor activity | biological_p…
313	NM_001637	AOAH	38330	35758	40964	205545	199707	227130	1.20355	1.20355	6.35904	0.056877	0.0684541	-0.0684541	acyloxyacyl hydrolase (neutrophil)	molecular_function:catalytic activity | molecular_function:lipoprotein lipase activity | cellular_component:extracellular region | biological_process:lipid metabolic process | biological_process:inflammatory response | molecular_function:acyloxyacyl hydrolase activity | molecular_function:hydrolase activity, acting on ester bonds | biological_process:negative regulation of inflammatory response |…
8639	NM_003734	AOC3	80219	110486	158544	208940	210672	212184	2.89784	2.89784	0	0.00023771	0.000688846	-0.000688846	amine oxidase, copper containing 3	molecular_function:copper ion binding | molecular_function:primary amine oxidase activity | biological_process:amine metabolic process | molecular_function:quinone binding | biological_process:oxidation-reduction process | molecular_function:cation channel activity | molecular_function:calcium ion binding | molecular_function:protein binding | cellular_component:cytoplasm | cellular_component:pla…
221656	NM_153042	AOF1	22396	18985	19453	216743	207761	209457	1.98737	1.98737	0	0.00235989	0.00468998	-0.00468998	lysine (K)-specific demethylase 1B	molecular_function:oxidoreductase activity | biological_process:oxidation-reduction process | molecular_function:zinc ion binding | molecular_function:DNA binding | cellular_component:nucleus | biological_process:regulation of gene expression by genetic imprinting | biological_process:transcription, DNA-templated | biological_process:regulation of transcription, DNA-templated | biological_process…
23028	NM_015013	AOF2	50054	48254	56401	235937	226935	234136	1.21849	1.21849	2.9389	0.0248933	0.0303323	-0.0303323	lysine (K)-specific demethylase 1A	biological_process:negative regulation of transcription from RNA polymerase II promoter | cellular_component:nuclear chromatin | molecular_function:p53 binding | molecular_function:chromatin binding | molecular_function:protein binding | cellular_component:nucleus | cellular_component:nucleoplasm | cellular_component:transcription factor complex | biological_process:transcription, DNA-templated |…
316	NM_001159	AOX1	60042	62997	64851	217626	225490	216744	1.20169	1.20169	6.35904	0.0518201	0.0622716	-0.0622716	aldehyde oxidase 1	molecular_function:electron carrier activity | molecular_function:metal ion binding | molecular_function:2 iron, 2 sulfur cluster binding | biological_process:oxidation-reduction process | molecular_function:aldehyde oxidase activity | molecular_function:xanthine dehydrogenase activity | molecular_function:iron ion binding | cellular_component:cytosol | biological_process:vitamin metabolic proces…
11276	NM_007247	AP1GBP1	221344	199307	164358	222281	232370	229590	1.28511	1.28511	0.042001	0.00133083	0.00171026	-0.00171026	synergin, gamma	molecular_function:calcium ion binding | cellular_component:cytoplasm | cellular_component:Golgi apparatus | biological_process:intracellular protein transport | biological_process:endocytosis | cellular_component:AP-1 adaptor complex | molecular_function:protein binding
10053	NM_005498	AP1M2	111532	90810	70648	253971	258604	253561	1.06139	1.06139	30.6466	0.181442	0.19258	-0.19258	adaptor-related protein complex 1, mu 2 subunit	biological_process:intracellular protein transport | biological_process:vesicle-mediated transport | cellular_component:clathrin adaptor complex | molecular_function:protein binding | cellular_component:Golgi membrane | cellular_component:lysosomal membrane | cellular_component:cytosol | biological_process:protein targeting | biological_process:post-Golgi vesicle-mediated transport | biological_p…
339488	NM_178548	AP2E	186778	190608	162871	257222	243670	229240	1.05376	1.05376	26.6081	0.126421	0.133217	-0.133217	transcription factor AP-2 epsilon (activating enhancer binding protein 2 epsilon)	molecular_function:sequence-specific DNA binding transcription factor activity | cellular_component:nucleus | biological_process:transcription, DNA-templated | biological_process:positive regulation of transcription from RNA polymerase II promoter | molecular_function:protein homodimerization activity | molecular_function:protein heterodimerization activity
8120	NM_004644	AP3B2	216916	208786	181748	283198	281006	298315	1.04364	1.04364	26.6081	0.0723438	0.0755008	-0.0755008	adaptor-related protein complex 3, beta 2 subunit	biological_process:intracellular protein transport | cellular_component:membrane coat | molecular_function:transporter activity | cellular_component:nucleus | cellular_component:cytoplasm | cellular_component:Golgi apparatus | biological_process:post-Golgi vesicle-mediated transport | biological_process:anterograde axon cargo transport | cellular_component:AP-3 adaptor complex | cellular_componen…
8943	NM_001077523	AP3D1	86199	76457	63080	297423	296294	258343	1.56124	1.56124	0	0.000856353	0.00133697	-0.00133697	adaptor-related protein complex 3, delta 1 subunit	cellular_component:Golgi membrane | molecular_function:transporter activity | cellular_component:lysosomal membrane | cellular_component:Golgi apparatus | biological_process:eye pigment biosynthetic process | biological_process:anterograde axon cargo transport | molecular_function:protein transporter activity | cellular_component:endosome membrane | cellular_component:membrane coat | biological_p…
10947	NM_006803	AP3M2	55320	56613	73558	195148	183477	173489	1.74392	1.74392	0	0.00127306	0.00222012	-0.00222012	adaptor-related protein complex 3, mu 2 subunit	biological_process:intracellular protein transport | cellular_component:clathrin adaptor complex | cellular_component:Golgi apparatus | biological_process:anterograde axon cargo transport | cellular_component:AP-type membrane coat adaptor complex | cellular_component:cytoplasmic vesicle membrane | biological_process:anterograde synaptic vesicle transport | biological_process:vesicle-mediated tran…
10717	NM_006594	AP4B1	211361	201073	183434	224224	220433	219940	1.25101	1.25101	0.137128	0.00219824	0.00275001	-0.00275001	adaptor-related protein complex 4, beta 1 subunit	biological_process:intracellular protein transport | molecular_function:protein transporter activity | biological_process:vesicle-mediated transport | cellular_component:clathrin adaptor complex | cellular_component:membrane coat | molecular_function:binding | cellular_component:coated pit | cellular_component:trans-Golgi network
9179	NM_004722	AP4M1	116898	122550	95655	237848	238957	235760	1.06776	1.06776	26.6081	0.132008	0.140953	-0.140953	adaptor-related protein complex 4, mu 1 subunit	biological_process:transport | biological_process:intracellular protein transport | biological_process:vesicle-mediated transport | cellular_component:clathrin adaptor complex | molecular_function:protein binding | cellular_component:Golgi trans cisterna | molecular_function:transporter activity | cellular_component:trans-Golgi network | cellular_component:coated pit | biological_process:Golgi to…
321	NM_005503	APBA2	288265	287883	276698	304834	298969	298322	1.03776	1.03776	26.6081	0.0537856	0.0558164	-0.0558164	amyloid beta (A4) precursor protein-binding, family A, member 2	molecular_function:protein binding | biological_process:nervous system development | biological_process:protein transport | biological_process:locomotory behavior | biological_process:regulation of gene expression | biological_process:multicellular organism growth | biological_process:in utero embryonic development | biological_process:synaptic transmission | cellular_component:plasma membrane | …
63941	NM_031231	APBA2BP	152124	134890	145791	238879	247577	248071	1.22662	1.22662	1.21626	0.0111125	0.0136308	-0.0136308	N-terminal EF-hand calcium binding protein 3	cellular_component:Golgi cis cisterna | molecular_function:calcium ion binding | molecular_function:protein binding | cellular_component:nucleus | cellular_component:cytoplasm | cellular_component:endoplasmic reticulum membrane | biological_process:protein secretion | biological_process:protein metabolic process | biological_process:regulation of amyloid precursor protein biosynthetic process
9546	NM_004886	APBA3	69104	63903	84737	196630	169870	172910	1.54573	1.54573	0	0.000219525	0.000339327	-0.000339327	amyloid beta (A4) precursor protein-binding, family A, member 3	molecular_function:enzyme inhibitor activity | molecular_function:protein binding | biological_process:protein transport | molecular_function:enzyme binding | biological_process:negative regulation of catalytic activity | cellular_component:perinuclear region of cytoplasm | biological_process:regulation of gene expression | biological_process:in utero embryonic development | biological_process:sy…
323	NM_173075	APBB2	134071	69195	62275	212206	220174	224999	1.49979	1.49979	0	0.000344692	0.000516967	-0.000516967	amyloid beta (A4) precursor protein-binding, family B, member 2	molecular_function:beta-amyloid binding | molecular_function:protein binding | cellular_component:nucleus | biological_process:regulation of transcription, DNA-templated | biological_process:cell cycle arrest | molecular_function:transcription factor binding | cellular_component:membrane | cellular_component:lamellipodium | biological_process:negative regulation of cell growth | cellular_componen…
10297	NM_005883	APC2	103494	108430	122409	230766	237225	233344	1.13717	1.13717	6.35904	0.0127732	0.0145252	-0.0145252	adenomatosis polyposis coli 2	molecular_function:beta-catenin binding | biological_process:negative regulation of Wnt signaling pathway | cellular_component:Golgi membrane | molecular_function:protein binding | cellular_component:cytoplasm | cellular_component:Golgi apparatus | cellular_component:actin filament | molecular_function:microtubule binding | cellular_component:microtubule cytoskeleton | cellular_component:catenin …
22824	NM_014278	APG-1	93907	90686	111260	264577	262911	289077	2.15159	2.15159	0	0.000237768	0.00051158	-0.00051158	heat shock 70kDa protein 4-like	molecular_function:ATP binding | cellular_component:nucleus | cellular_component:cytoplasm | cellular_component:cytosol | biological_process:protein folding | biological_process:response to unfolded protein | biological_process:cell morphogenesis | molecular_function:protein binding
8539	NM_006595	API5	258448	254386	258729	275405	273930	279253	1.4971	1.4971	0	0.000512738	0.000767618	-0.000767618	apoptosis inhibitor 5	molecular_function:binding | cellular_component:nucleus | molecular_function:protein binding | cellular_component:spliceosomal complex | cellular_component:cytoplasm | biological_process:apoptotic process | cellular_component:membrane | molecular_function:fibroblast growth factor binding | biological_process:negative regulation of apoptotic process | molecular_function:poly(A) RNA binding | molec…
54959	NM_017855	APIN	90139	91523	92487	192091	162848	199337	2.05454	2.05454	0	0.000222067	0.000456246	-0.000456246	odontogenic, ameloblast asssociated	cellular_component:extracellular region | biological_process:biomineral tissue development | biological_process:odontogenesis of dentin-containing tooth | cellular_component:fibril | cellular_component:cytoplasm | cellular_component:nucleus
8862	NM_017413	APLN	54234	43840	53212	232583	244211	216073	1.39304	1.39304	0.443512	0.0318863	0.0444189	-0.0444189	apelin
201501	NM_001039360	APM-1	86965	78659	101123	180858	205730	190850	1.51875	1.51875	0.042001	0.0204895	0.0311184	-0.0311184	zinc finger and BTB domain containing 7C	molecular_function:nucleic acid binding | molecular_function:metal ion binding | molecular_function:protein binding
335	NM_000039	APOA1	276131	280394	87316	242500	236183	234940	2.12543	2.12543	0.00681625	0.0340795	0.0724336	-0.0724336	apolipoprotein A-I	biological_process:retinoid metabolic process | molecular_function:beta-amyloid binding | biological_process:platelet degranulation | biological_process:negative regulation of cytokine secretion involved in immune response | molecular_function:protein binding | molecular_function:phospholipid binding | cellular_component:extracellular region | cellular_component:extracellular space | cellular_com…
337	NM_000482	APOA4	23004	22091	20764	176909	199109	181793	2.0271	2.0271	0	0.000888331	0.00180074	-0.00180074	apolipoprotein A-IV	biological_process:retinoid metabolic process | biological_process:innate immune response in mucosa | molecular_function:lipid transporter activity | molecular_function:copper ion binding | cellular_component:extracellular region | cellular_component:extracellular space | cellular_component:early endosome | cellular_component:endoplasmic reticulum lumen | cellular_component:cytosol | biological_p…
116519	NM_052968	APOA5	168356	141765	154635	253345	254395	259055	1.26535	1.26535	1.21626	0.0237062	0.0299966	-0.0299966	apolipoprotein A-V	molecular_function:lipid binding | biological_process:lipoprotein metabolic process | molecular_function:phospholipid binding | cellular_component:extracellular region | cellular_component:extracellular space | biological_process:triglyceride metabolic process | biological_process:lipid transport | molecular_function:enzyme activator activity | molecular_function:heparin binding | biological_proc…
55911	NM_018690	APOB48R	58959	82243	88268	233804	251093	241960	2.06764	2.06764	0	0.00392352	0.00811244	-0.00811244	apolipoprotein B receptor	cellular_component:plasma membrane | biological_process:lipid transport | biological_process:receptor-mediated endocytosis | biological_process:cholesterol metabolic process | cellular_component:very-low-density lipoprotein particle | cellular_component:chylomicron | biological_process:triglyceride metabolic process | molecular_function:very-low-density lipoprotein particle receptor activity
339	NM_001644	APOBEC1	12054	11598	6945	251811	234124	211145	1.00761	1.00761	37.008	0.23602	0.237816	-0.237816	apolipoprotein B mRNA editing enzyme, catalytic polypeptide 1	molecular_function:RNA binding | molecular_function:cytidine deaminase activity | molecular_function:protein binding | cellular_component:nucleoplasm | cellular_component:cytoplasm | biological_process:RNA processing | biological_process:mRNA processing | biological_process:lipid metabolic process | molecular_function:zinc ion binding | biological_process:cytidine deamination | biological_process…
10930	NM_006789	APOBEC2	86172	81095	71807	244293	235721	231454	1.11173	1.11173	16.2507	0.0818324	0.0909758	-0.0909758	apolipoprotein B mRNA editing enzyme, catalytic polypeptide-like 2	molecular_function:RNA binding | molecular_function:cytidine deaminase activity | biological_process:mRNA processing | molecular_function:zinc ion binding | biological_process:cytidine deamination | biological_process:DNA demethylation | molecular_function:hydrolase activity, acting on carbon-nitrogen (but not peptide) bonds, in cyclic amidines | molecular_function:hydrolase activity, acting on c…
200315	NM_145699	APOBEC3A	119532	116282	121642	152329	142751	143045	2.82805	2.82805	0	2.68e-05	7.57917e-05	-7.57917e-05	apolipoprotein B mRNA editing enzyme, catalytic polypeptide-like 3A	molecular_function:cytidine deaminase activity | molecular_function:protein binding | cellular_component:nucleus | cellular_component:cytoplasm | molecular_function:zinc ion binding | biological_process:cytidine deamination | biological_process:negative regulation of transposition | biological_process:clearance of foreign intracellular DNA by conversion of DNA cytidine to uridine | biological_pro…
9582	NM_004900	APOBEC3B	55603	65815	64437	235979	221822	249550	1.44311	1.44311	0.042001	0.0122083	0.0176179	-0.0176179	apolipoprotein B mRNA editing enzyme, catalytic polypeptide-like 3B	cellular_component:nucleus | biological_process:metabolic process | molecular_function:zinc ion binding | biological_process:negative regulation of transposition | molecular_function:poly(A) RNA binding | molecular_function:poly(A) RNA binding | molecular_function:poly(A) RNA binding | molecular_function:poly(A) RNA binding | molecular_function:poly(A) RNA binding | molecular_function:poly(A) RNA…
27350	NM_014508	APOBEC3C	54348	46981	52558	227790	222580	225989	1.04522	1.04522	30.6466	0.163496	0.170888	-0.170888	apolipoprotein B mRNA editing enzyme, catalytic polypeptide-like 3C	molecular_function:protein binding | cellular_component:nucleus | cellular_component:cytoplasm | molecular_function:zinc ion binding | biological_process:cytidine deamination | biological_process:negative regulation of transposition | biological_process:viral process | molecular_function:hydrolase activity, acting on carbon-nitrogen (but not peptide) bonds, in cyclic amidines | molecular_function…
140564	NM_152426	APOBEC3D	43571	46388	46457	152978	158860	138163	1.40744	1.40744	0.137128	0.014532	0.0204529	-0.0204529	apolipoprotein B mRNA editing enzyme, catalytic polypeptide-like 3D	cellular_component:cytoplasmic mRNA processing body | molecular_function:zinc ion binding | biological_process:negative regulation of transposition | molecular_function:hydrolase activity, acting on carbon-nitrogen (but not peptide) bonds, in cyclic amidines | molecular_function:hydrolase activity, acting on carbon-nitrogen (but not peptide) bonds, in cyclic amidines | molecular_function:hydrolas…
60489	NM_021822	APOBEC3G	163244	152837	158802	266255	264528	262538	2.28076	2.28076	0	4.18e-05	9.53359e-05	-9.53359e-05	apolipoprotein B mRNA editing enzyme, catalytic polypeptide-like 3G	cellular_component:cytoplasmic mRNA processing body | biological_process:positive regulation of defense response to virus by host | molecular_function:RNA binding | molecular_function:cytidine deaminase activity | molecular_function:protein binding | cellular_component:cytosol | molecular_function:zinc ion binding | biological_process:cytidine deamination | biological_process:negative regulation …
341	NM_001645	APOC1	165772	145973	162416	276089	273244	275784	1.37211	1.37211	0.137128	0.0130691	0.0179323	-0.0179323	apolipoprotein C-I	cellular_component:extracellular region | biological_process:lipoprotein metabolic process | molecular_function:phospholipase inhibitor activity | molecular_function:fatty acid binding | cellular_component:endoplasmic reticulum | biological_process:lipid metabolic process | biological_process:positive regulation of cholesterol esterification | biological_process:negative regulation of phosphatidy…
347	NM_001647	APOD	107250	105397	121738	274175	271597	269791	1.57466	1.57466	0	0.000596279	0.000938939	-0.000938939	apolipoprotein D	molecular_function:transporter activity | molecular_function:lipid binding | biological_process:response to reactive oxygen species | biological_process:angiogenesis | molecular_function:lipid transporter activity | molecular_function:protein binding | cellular_component:extracellular region | cellular_component:extracellular space | cellular_component:endoplasmic reticulum | biological_process:g…
319	NM_001638	APOF	105374	100002	121156	154962	160869	168906	2.29761	2.29761	0	0.0199164	0.04576	-0.04576	apolipoprotein F	molecular_function:receptor binding | molecular_function:lipid transporter activity | cellular_component:extracellular region | biological_process:lipid metabolic process | molecular_function:cholesterol binding | cellular_component:low-density lipoprotein particle | cellular_component:high-density lipoprotein particle | biological_process:triglyceride metabolic process | biological_process:chole…
350	NM_000042	APOH	68183	74765	78262	254339	240812	237231	1.16539	1.16539	2.9389	0.0101797	0.0118634	-0.0118634	apolipoprotein H (beta-2-glycoprotein I)	biological_process:negative regulation of endothelial cell proliferation | molecular_function:glycoprotein binding | molecular_function:phospholipid binding | cellular_component:extracellular space | biological_process:triglyceride metabolic process | biological_process:blood coagulation, intrinsic pathway | molecular_function:heparin binding | cellular_component:cell surface | biological_process…
8542	NM_003661	APOL1	36219	37006	47277	170461	168162	171648	1.61518	1.61518	0	0.00920751	0.0148718	-0.0148718	apolipoprotein L, 1	cellular_component:extracellular region | biological_process:lipid transport | molecular_function:lipid binding | biological_process:lipoprotein metabolic process | molecular_function:chloride channel activity | molecular_function:protein binding | cellular_component:extracellular space | biological_process:chloride transport | biological_process:cholesterol metabolic process | biological_process…
80833	NM_145640	APOL3	38378	52594	56774	187329	203510	193396	1.20799	1.20799	6.35904	0.0622842	0.0752387	-0.0752387	apolipoprotein L, 3	molecular_function:signal transducer activity | molecular_function:lipid transporter activity | cellular_component:cellular_component | cellular_component:extracellular region | cellular_component:cytoplasm | biological_process:inflammatory response | biological_process:signal transduction | molecular_function:lipid binding | cellular_component:membrane | biological_process:lipoprotein metabolic …
80832	NM_145660	APOL4	187973	182057	167298	269623	277202	283939	1.08205	1.08205	16.2507	0.00656452	0.00710312	-0.00710312	apolipoprotein L, 4	cellular_component:extracellular region | biological_process:lipid transport | molecular_function:lipid binding | biological_process:lipoprotein metabolic process | cellular_component:extracellular space | biological_process:lipid metabolic process
8883	NM_001018160	APPBP1	20873	21177	19529	226150	231824	224340	1.25198	1.25198	2.9389	0.0575229	0.0720174	-0.0720174	NEDD8 activating enzyme E1 subunit 1	molecular_function:protein binding | cellular_component:nucleus | cellular_component:cytoplasm | cellular_component:cytosol | cellular_component:plasma membrane | biological_process:signal transduction | molecular_function:ubiquitin protein ligase binding | biological_process:mitotic DNA replication checkpoint | biological_process:regulation of apoptotic process | biological_process:regulation of…
10513	NM_006380	APPBP2	99093	99889	72143	238625	256955	254750	1.24509	1.24509	0.443512	0.0055632	0.0069267	-0.0069267	amyloid beta precursor protein (cytoplasmic tail) binding protein 2	molecular_function:microtubule motor activity | molecular_function:protein binding | cellular_component:nucleus | cellular_component:cytoplasm | cellular_component:microtubule associated complex | biological_process:intracellular protein transport | biological_process:metabolic process | cellular_component:cytoplasmic vesicle membrane | biological_process:intracellular transport
339883	NM_178339	APRG1	69451	66661	54577	207880	196383	199978	1.21829	1.21829	1.21626	0.0134521	0.0163886	-0.0163886	chromosome 3 open reading frame 35	cellular_component:integral component of membrane
23047	NM_015032	APRIN	45013	43888	59130	246493	240729	213758	1.35598	1.35598	0.00681625	0.0025295	0.00342995	-0.00342995	PDS5, regulator of cohesion maintenance, homolog B (S. cerevisiae)	biological_process:mitotic cell cycle | cellular_component:chromosome, centromeric region | cellular_component:chromatin | molecular_function:DNA binding | molecular_function:protein binding | molecular_function:ATP binding | cellular_component:nucleus | cellular_component:nucleoplasm | cellular_component:cytosol | biological_process:mitotic sister chromatid cohesion | biological_process:cell pro…
353	NM_001030018	APRT	62077	62004	71111	212475	204135	216943	1.69186	1.69186	0	0.00144607	0.00244654	-0.00244654	adenine phosphoribosyltransferase	cellular_component:nucleus | cellular_component:cytoplasm | molecular_function:adenine phosphoribosyltransferase activity | cellular_component:cytosol | biological_process:purine nucleobase metabolic process | molecular_function:AMP binding | biological_process:purine-containing compound salvage | biological_process:AMP salvage | biological_process:small molecule metabolic process | biological_pr…
357	NM_001649	APXL	119975	140401	121327	227795	191645	204505	1.00509	1.00509	37.008	0.228889	0.230054	-0.230054	shroom family member 2	biological_process:cell morphogenesis | biological_process:establishment of melanosome localization | biological_process:apical protein localization | molecular_function:actin filament binding | biological_process:lens morphogenesis in camera-type eye | molecular_function:actin binding | molecular_function:protein binding | cellular_component:cytoskeleton | cellular_component:microtubule | cellul…
358	NM_198098	AQP1	40139	46938	90234	187075	183921	190899	1.52302	1.52302	0.137128	0.025925	0.0394843	-0.0394843	aquaporin 1 (Colton blood group)	biological_process:renal water transport | molecular_function:intracellular cGMP activated cation channel activity | molecular_function:potassium channel activity | molecular_function:water transmembrane transporter activity | molecular_function:protein binding | cellular_component:nucleus | cellular_component:cytoplasm | cellular_component:plasma membrane | cellular_component:integral component …
89872	NM_080429	AQP10	66545	76871	68475	250146	232710	241304	1.04456	1.04456	26.6081	0.0631312	0.0659445	-0.0659445	aquaporin 10	molecular_function:transporter activity | cellular_component:plasma membrane | biological_process:water transport | biological_process:response to toxic substance | cellular_component:integral component of membrane | biological_process:transmembrane transport
375318	NM_198998	AQP12	124844	116720	113523	162470	174303	165349	1.0474	1.0474	30.6466	0.180748	0.189316	-0.189316	aquaporin 12A	molecular_function:transporter activity | cellular_component:integral component of membrane
359	NM_000486	AQP2	44241	48007	51973	152429	173605	169098	1.11869	1.11869	16.2507	0.104961	0.117418	-0.117418	aquaporin 2 (collecting duct)	molecular_function:transporter activity | cellular_component:integral component of membrane | molecular_function:water transmembrane transporter activity | cellular_component:plasma membrane | biological_process:water transport | biological_process:excretion | molecular_function:glycerol transmembrane transporter activity | molecular_function:water channel activity | biological_process:glycerol t…
362	NM_001651	AQP5	9480	10632	13405	222647	213801	233586	1.22162	1.22162	11.095	0.0969582	0.118446	-0.118446	aquaporin 5	molecular_function:protein binding | cellular_component:plasma membrane | cellular_component:integral component of plasma membrane | biological_process:water transport | biological_process:excretion | molecular_function:water channel activity | biological_process:carbon dioxide transport | cellular_component:apical plasma membrane | biological_process:pancreatic juice secretion | biological_proce…
363	NM_001652	AQP6	86712	58528	74709	204626	192246	203702	1.19973	1.19973	11.095	0.0874261	0.104888	-0.104888	aquaporin 6, kidney specific	cellular_component:integral component of membrane | molecular_function:transporter activity | molecular_function:anion channel activity | cellular_component:integral component of plasma membrane | biological_process:water transport | biological_process:excretion | molecular_function:water channel activity | cellular_component:transport vesicle membrane | biological_process:odontogenesis | biologi…
343	NM_001169	AQP8	20181	14652	12551	209052	213178	218055	1.04799	1.04799	30.6466	0.177451	0.185967	-0.185967	aquaporin 8	cellular_component:plasma membrane | cellular_component:integral component of plasma membrane | biological_process:transport | biological_process:water transport | molecular_function:water channel activity | cellular_component:apical part of cell | biological_process:transmembrane transport | biological_process:cellular response to cAMP | molecular_function:transporter activity | cellular_compone…
9716	NM_014691	AQR	77581	78268	77391	112852	107762	113620	1.37644	1.37644	0	0.000805904	0.00110928	-0.00110928	aquarius intron-binding spliceosomal factor	biological_process:mRNA splicing, via spliceosome | molecular_function:protein binding | cellular_component:nucleus | cellular_component:membrane | molecular_function:poly(A) RNA binding | molecular_function:poly(A) RNA binding | molecular_function:poly(A) RNA binding | molecular_function:poly(A) RNA binding | molecular_function:poly(A) RNA binding | molecular_function:poly(A) RNA binding | molec…
369	NM_001654	ARAF1	125017	94017	84257	274132	265419	265017	1.24078	1.24078	1.21626	0.0235167	0.029179	-0.029179	A-Raf proto-oncogene, serine/threonine kinase	molecular_function:protein kinase activity | molecular_function:protein serine/threonine kinase activity | molecular_function:receptor signaling protein activity | molecular_function:protein binding | molecular_function:ATP binding | cellular_component:cellular_component | biological_process:cellular protein modification process | biological_process:protein phosphorylation | biological_process:re…
81857	NM_030973	ARC92	61326	51020	50569	212731	218638	220153	1.05771	1.05771	30.6466	0.173505	0.183517	-0.183517	mediator complex subunit 25	biological_process:negative regulation of transcription from RNA polymerase II promoter | molecular_function:protein binding | cellular_component:nucleoplasm | biological_process:transcription initiation from RNA polymerase II promoter | molecular_function:transcription factor binding | biological_process:cell death | biological_process:gene expression | biological_process:positive regulation of …
339487	NM_178547	ARCH	203944	175337	160877	279948	263047	272276	1.00275	1.00275	37.008	0.233129	0.233771	-0.233771	zinc finger and BTB domain containing 8 opposite strand	cellular_component:nucleus | cellular_component:extracellular vesicular exosome
372	NM_001655	ARCN1	34515	36533	36385	62437	57733	54929	1.20896	1.20896	6.35904	0.0526173	0.0636122	-0.0636122	archain 1	cellular_component:cytoplasm | cellular_component:Golgi apparatus | cellular_component:cytosol | biological_process:intracellular protein transport | biological_process:retrograde vesicle-mediated transport, Golgi to ER | cellular_component:membrane | cellular_component:COPI vesicle coat | cellular_component:clathrin adaptor complex | cellular_component:intracellular membrane-bounded organelle | …
374	NM_001657	AREG	17404	17805	16653	202548	207099	203734	1.48509	1.48509	0.00681625	0.00683988	0.0101579	-0.0101579	amphiregulin	molecular_function:cytokine activity | molecular_function:protein binding | cellular_component:extracellular space | biological_process:epidermal growth factor receptor signaling pathway | biological_process:G-protein coupled receptor signaling pathway | biological_process:cell-cell signaling | molecular_function:growth factor activity | biological_process:cell proliferation | cellular_component:…
375	NM_001658	ARF1	77628	79742	86174	184504	191862	188390	1.33334	1.33334	0.443512	0.0249454	0.0332606	-0.0332606	ADP-ribosylation factor 1	cellular_component:Golgi membrane | biological_process:regulation of receptor internalization | molecular_function:GTPase activity | molecular_function:receptor signaling protein activity | molecular_function:protein binding | molecular_function:GTP binding | cellular_component:cytosol | cellular_component:plasma membrane | biological_process:GTP catabolic process | biological_process:phospholipi…
377	NM_001659	ARF3	139591	112797	100405	286551	280161	285887	1.46518	1.46518	0	0.00462311	0.00677371	-0.00677371	ADP-ribosylation factor 3	molecular_function:GTP binding | biological_process:small GTPase mediated signal transduction | cellular_component:intracellular | molecular_function:GTPase activity | molecular_function:signal transducer activity | molecular_function:guanyl nucleotide binding | molecular_function:G-protein beta/gamma-subunit complex binding | biological_process:G-protein coupled receptor signaling pathway | biol…
55738	NM_018209	ARFGAP1	16654	14931	14345	304517	289155	250292	1.36223	1.36223	0.042001	0.00709393	0.00966356	-0.00966356	ADP-ribosylation factor GTPase activating protein 1	molecular_function:ARF GTPase activator activity | molecular_function:zinc ion binding | biological_process:regulation of ARF GTPase activity | biological_process:positive regulation of GTPase activity | molecular_function:protein binding | cellular_component:cytosol | biological_process:retrograde vesicle-mediated transport, Golgi to ER | biological_process:activation of signaling protein activi…
26286	NM_014570	ARFGAP3	64187	71412	71899	244502	260162	260468	1.46349	1.46349	0	0.00097766	0.0014308	-0.0014308	ADP-ribosylation factor GTPase activating protein 3	cellular_component:Golgi membrane | molecular_function:protein binding | cellular_component:cytoplasm | cellular_component:Golgi apparatus | cellular_component:cytosol | biological_process:intracellular protein transport | molecular_function:ARF GTPase activator activity | molecular_function:zinc ion binding | molecular_function:protein transporter activity | biological_process:protein secretion …
10564	NM_006420	ARFGEF2	87544	99505	113741	233574	219315	237950	1.13249	1.13249	16.2507	0.0961016	0.108834	-0.108834	ADP-ribosylation factor guanine nucleotide-exchange factor 2 (brefeldin A-inhibited)	cellular_component:Golgi membrane | biological_process:receptor recycling | molecular_function:guanyl-nucleotide exchange factor activity | molecular_function:ARF guanyl-nucleotide exchange factor activity | molecular_function:protein binding | cellular_component:trans-Golgi network | cellular_component:microtubule organizing center | cellular_component:cytosol | cellular_component:axonemal micro…
10139	NM_003224	ARFRP1	38044	41827	48540	127041	129902	139127	1.92302	1.92302	0	0.000732457	0.00140853	-0.00140853	ADP-ribosylation factor related protein 1	molecular_function:GTP binding | cellular_component:intracellular | biological_process:small GTPase mediated signal transduction | molecular_function:GTPase activity | molecular_function:signal transducer activity | molecular_function:guanyl nucleotide binding | molecular_function:G-protein beta/gamma-subunit complex binding | biological_process:G-protein coupled receptor signaling pathway | cell…
54622	NM_019087	ARFRP2	59571	62998	56693	209155	212933	216538	1.10116	1.10116	16.2507	0.0787372	0.0867021	-0.0867021	ADP-ribosylation factor-like 15	molecular_function:molecular_function | molecular_function:GTP binding | cellular_component:intracellular | biological_process:small GTPase mediated signal transduction | cellular_component:extracellular vesicular exosome | biological_process:intracellular protein transport | cellular_component:nucleus | cellular_component:cytoplasm
383	NM_000045	ARG1	95217	90470	94794	215791	244379	243124	1.86823	1.86823	0.00681625	0.0243002	0.0453985	-0.0453985	arginase 1	biological_process:urea cycle | molecular_function:arginase activity | cellular_component:nucleus | cellular_component:cytoplasm | cellular_component:cytosol | biological_process:arginine catabolic process | biological_process:cellular nitrogen compound metabolic process | biological_process:small molecule metabolic process | cellular_component:extracellular vesicular exosome | molecular_function…
384	NM_001172	ARG2	82119	62234	59643	243903	222454	230600	1.10492	1.10492	21.6065	0.115713	0.127853	-0.127853	arginase 2	biological_process:urea cycle | molecular_function:arginase activity | cellular_component:mitochondrion | cellular_component:mitochondrial matrix | biological_process:arginine metabolic process | biological_process:nitric oxide biosynthetic process | biological_process:cellular nitrogen compound metabolic process | biological_process:small molecule metabolic process | molecular_function:metal ion…
503582	NM_001012659	ARGFX	50298	49150	57995	204500	209092	196577	1.34614	1.34614	0.00681625	0.00133685	0.00179959	-0.00179959	arginine-fifty homeobox	molecular_function:sequence-specific DNA binding transcription factor activity | cellular_component:nucleus | biological_process:transcription, DNA-templated | biological_process:regulation of transcription, DNA-templated
26119	NM_015627	ARH	123583	112690	114806	268261	270069	266363	1.29794	1.29794	0.00681625	0.000638697	0.000828988	-0.000828988	low density lipoprotein receptor adaptor protein 1	molecular_function:beta-amyloid binding | molecular_function:phosphotyrosine binding | molecular_function:protein binding | molecular_function:phosphatidylinositol-4,5-bisphosphate binding | cellular_component:early endosome | cellular_component:cytosol | cellular_component:neurofilament | biological_process:transport | biological_process:receptor-mediated endocytosis | biological_process:cholest…
390	NM_005168	ARHE	59469	57225	62706	147483	153305	155718	2.29635	2.29635	0	0.000573562	0.0013171	-0.0013171	Rho family GTPase 3	molecular_function:GTP binding | biological_process:small GTPase mediated signal transduction | cellular_component:intracellular | cellular_component:Golgi membrane | molecular_function:GTPase activity | molecular_function:protein binding | biological_process:GTP catabolic process | biological_process:cell adhesion | biological_process:actin cytoskeleton organization | cellular_component:extracel…
9824	NM_014783	ARHGAP11A	138579	148690	120220	244007	240111	255734	1.05296	1.05296	26.6081	0.12953	0.13639	-0.13639	Rho GTPase activating protein 11A	biological_process:signal transduction | cellular_component:intracellular | molecular_function:GTPase activator activity | cellular_component:cytosol | biological_process:small GTPase mediated signal transduction | biological_process:positive regulation of GTPase activity | biological_process:regulation of small GTPase mediated signal transduction
55843	NM_018460	ARHGAP15	48503	61504	67759	231406	211810	238091	1.11497	1.11497	11.095	0.0281419	0.0313773	-0.0313773	Rho GTPase activating protein 15	cellular_component:cytosol | biological_process:small GTPase mediated signal transduction | biological_process:regulation of cell shape | cellular_component:membrane | molecular_function:Rac GTPase activator activity | biological_process:positive regulation of Rac GTPase activity | biological_process:regulation of small GTPase mediated signal transduction | cellular_component:intracellular
93663	NM_033515	ARHGAP18	152890	146691	97279	230294	223649	224760	1.14064	1.14064	16.2507	0.0957414	0.109207	-0.109207	Rho GTPase activating protein 18	molecular_function:GTPase activator activity | cellular_component:cytosol | biological_process:small GTPase mediated signal transduction | biological_process:positive regulation of GTPase activity | biological_process:regulation of small GTPase mediated signal transduction | cellular_component:intracellular
58504	NM_021226	ARHGAP22	71445	75133	93503	259670	253516	256639	1.03352	1.03352	30.6466	0.172669	0.178456	-0.178456	Rho GTPase activating protein 22	biological_process:angiogenesis | molecular_function:GTPase activator activity | molecular_function:protein binding | cellular_component:nucleus | cellular_component:cytosol | biological_process:transcription, DNA-templated | biological_process:regulation of transcription, DNA-templated | biological_process:small GTPase mediated signal transduction | biological_process:cell differentiation | biol…
9938	NM_014882	ARHGAP25	59157	61011	76351	247556	228922	254827	1.77559	1.77559	0	0.000990858	0.00175936	-0.00175936	Rho GTPase activating protein 25	molecular_function:GTPase activator activity | cellular_component:intracellular | biological_process:signal transduction | biological_process:positive regulation of GTPase activity | cellular_component:cytosol | biological_process:small GTPase mediated signal transduction | biological_process:regulation of small GTPase mediated signal transduction
23092	NM_015071	ARHGAP26	133426	114808	118535	221255	223505	226006	1.29718	1.29718	0.00681625	0.000666408	0.00086445	-0.00086445	Rho GTPase activating protein 26	molecular_function:Rho GTPase activator activity | molecular_function:protein binding | molecular_function:phospholipid binding | cellular_component:cellular_component | cellular_component:cytosol | cellular_component:cytoskeleton | cellular_component:focal adhesion | biological_process:small GTPase mediated signal transduction | biological_process:nervous system development | molecular_function:…
79822	NM_030672	ARHGAP28	71533	58885	72935	235351	231075	239821	1.31094	1.31094	0.042001	0.00360409	0.00472475	-0.00472475	Rho GTPase activating protein 28	cellular_component:nucleus | cellular_component:cell junction | molecular_function:GTPase activator activity | cellular_component:cytosol | biological_process:small GTPase mediated signal transduction | biological_process:positive regulation of GTPase activity | biological_process:regulation of small GTPase mediated signal transduction | cellular_component:intracellular
393	NM_001666	ARHGAP4	168112	164100	134244	264783	263547	280742	1.19298	1.19298	1.21626	0.00540241	0.00644498	-0.00644498	Rho GTPase activating protein 4	cellular_component:intracellular | biological_process:signal transduction | molecular_function:protein binding | molecular_function:SH3/SH2 adaptor activity | cellular_component:cytoplasm | cellular_component:cytosol | biological_process:cytoskeleton organization | biological_process:small GTPase mediated signal transduction | biological_process:Rho protein signal transduction | biological_proces…
23779	NM_181335	ARHGAP8	29506	33071	47342	211020	201197	221305	1.04273	1.04273	26.6081	0.0844959	0.0881068	-0.0881068	Rho GTPase activating protein 8	cellular_component:intracellular | biological_process:signal transduction | molecular_function:Rho GTPase activator activity | molecular_function:protein binding | cellular_component:cytosol | biological_process:small GTPase mediated signal transduction | biological_process:positive regulation of Rho GTPase activity | biological_process:regulation of small GTPase mediated signal transduction | bi…
64333	NM_001080156	ARHGAP9	213870	221140	219676	273589	268945	278939	1.14824	1.14824	6.35904	0.0179928	0.0206599	-0.0206599	Rho GTPase activating protein 9	molecular_function:GTPase activator activity | molecular_function:phosphatidylinositol-3,4,5-trisphosphate binding | cellular_component:cytosol | biological_process:small GTPase mediated signal transduction | biological_process:positive regulation of GTPase activity | biological_process:regulation of small GTPase mediated signal transduction | molecular_function:protein binding | cellular_compone…
396	NM_004309	ARHGDIA	173369	169703	187720	309809	314357	320900	1.73847	1.73847	0	0.00174345	0.00303093	-0.00303093	Rho GDP dissociation inhibitor (GDI) alpha	cellular_component:cytoplasm | biological_process:regulation of catalytic activity | molecular_function:GTPase activator activity | molecular_function:protein binding | cellular_component:cytosol | cellular_component:cytoskeleton | biological_process:cellular component movement | biological_process:negative regulation of cell adhesion | biological_process:small GTPase mediated signal transduction…
398	NM_001176	ARHGDIG	191602	199827	178089	246406	243215	244421	1.08317	1.08317	21.6065	0.0684962	0.0741933	-0.0741933	Rho GDP dissociation inhibitor (GDI) gamma	molecular_function:Rho GDP-dissociation inhibitor activity | cellular_component:cytoplasm | biological_process:regulation of catalytic activity | molecular_function:GTPase activator activity | cellular_component:cytosol | biological_process:negative regulation of cell adhesion | biological_process:small GTPase mediated signal transduction | biological_process:Rho protein signal transduction | cel…
23365	NM_015313	ARHGEF12	75653	84477	99001	209736	218114	199840	1.19956	1.19956	6.35904	0.0544152	0.0652743	-0.0652743	Rho guanine nucleotide exchange factor (GEF) 12	molecular_function:Rho guanyl-nucleotide exchange factor activity | cellular_component:cytoplasm | biological_process:positive regulation of Rho GTPase activity | biological_process:intracellular signal transduction | biological_process:termination of G-protein coupled receptor signaling pathway | molecular_function:G-protein coupled receptor binding | molecular_function:GTPase activator activity…
22899	NM_173728	ARHGEF15	49936	47968	46438	209724	224160	217397	1.03057	1.03057	33.6721	0.187292	0.193018	-0.193018	Rho guanine nucleotide exchange factor (GEF) 15	molecular_function:Rho guanyl-nucleotide exchange factor activity | molecular_function:GTPase activator activity | molecular_function:protein binding | cellular_component:dendrite | biological_process:positive regulation of Rho GTPase activity | biological_process:regulation of catalytic activity | biological_process:negative regulation of synapse maturation | biological_process:regulation of Rho…
27237	NM_014448	ARHGEF16	68216	57754	84392	256184	254426	264233	1.31745	1.31745	1.21626	0.0491048	0.0646933	-0.0646933	Rho guanine nucleotide exchange factor (GEF) 16	molecular_function:Rho guanyl-nucleotide exchange factor activity | biological_process:positive regulation of Rho GTPase activity | molecular_function:protein binding | cellular_component:cytosol | biological_process:small GTPase mediated signal transduction | molecular_function:Rho GTPase binding | molecular_function:PDZ domain binding | molecular_function:receptor tyrosine kinase binding | biol…
9828	NM_014786	ARHGEF17	96462	95056	117967	247661	274642	269513	1.49477	1.49477	0	0.000342133	0.00051141	-0.00051141	Rho guanine nucleotide exchange factor (GEF) 17	molecular_function:guanyl-nucleotide exchange factor activity | molecular_function:Rho guanyl-nucleotide exchange factor activity | cellular_component:cytosol | biological_process:small GTPase mediated signal transduction | biological_process:actin cytoskeleton organization | biological_process:positive regulation of Rho GTPase activity | biological_process:positive regulation of apoptotic proces…
23370	NM_015318	ARHGEF18	31333	31077	42283	181452	174811	167155	1.56616	1.56616	0	0.007441	0.0116538	-0.0116538	Rho/Rac guanine nucleotide exchange factor (GEF) 18	molecular_function:Rho guanyl-nucleotide exchange factor activity | biological_process:regulation of Rho protein signal transduction | molecular_function:metal ion binding | cellular_component:cytoplasm | cellular_component:cytosol | biological_process:transforming growth factor beta receptor signaling pathway | biological_process:small GTPase mediated signal transduction | biological_process:reg…
128272	NM_153213	ARHGEF19	234596	224615	209576	241465	231713	234993	1.27956	1.27956	0.042001	0.00100509	0.00128608	-0.00128608	Rho guanine nucleotide exchange factor (GEF) 19	molecular_function:Rho guanyl-nucleotide exchange factor activity | molecular_function:GTPase activator activity | molecular_function:protein binding | biological_process:regulation of actin cytoskeleton organization | biological_process:regulation of Rho protein signal transduction | biological_process:positive regulation of Rho GTPase activity | biological_process:wound healing
9181	NM_004723	ARHGEF2	43068	43222	47828	179333	195251	178845	1.02273	1.02273	36.0237	0.212006	0.216824	-0.216824	Rho/Rac guanine nucleotide exchange factor (GEF) 2	biological_process:cell morphogenesis | molecular_function:Rho guanyl-nucleotide exchange factor activity | molecular_function:protein binding | cellular_component:cytoplasm | cellular_component:Golgi apparatus | cellular_component:spindle | cellular_component:cytosol | cellular_component:cytoskeleton | cellular_component:microtubule | cellular_component:tight junction | biological_process:intrac…
50650	NM_019555	ARHGEF3	142921	125358	123817	237349	246132	230351	1.07862	1.07862	26.6081	0.159581	0.172127	-0.172127	Rho guanine nucleotide exchange factor (GEF) 3	molecular_function:Rho guanyl-nucleotide exchange factor activity | cellular_component:intracellular | cellular_component:cytosol | biological_process:small GTPase mediated signal transduction | biological_process:Rho protein signal transduction | biological_process:positive regulation of Rho GTPase activity | biological_process:positive regulation of apoptotic process | biological_process:neurot…
50649	NM_015320	ARHGEF4	196409	218132	167086	263413	234008	248569	1.00629	1.00629	37.008	0.226304	0.227727	-0.227727	Rho guanine nucleotide exchange factor (GEF) 4	molecular_function:guanyl-nucleotide exchange factor activity | molecular_function:protein binding | cellular_component:cytosol | biological_process:small GTPase mediated signal transduction | molecular_function:protein domain specific binding | biological_process:lamellipodium assembly | molecular_function:Rac guanyl-nucleotide exchange factor activity | cellular_component:ruffle membrane | biol…
7984	NM_005435	ARHGEF5	32299	44192	55522	200822	200275	201700	1.22291	1.22291	6.35904	0.0892892	0.109193	-0.109193	Rho guanine nucleotide exchange factor (GEF) 5	molecular_function:Rho guanyl-nucleotide exchange factor activity | molecular_function:protein binding | molecular_function:GTP binding | biological_process:regulation of Rho GTPase activity | biological_process:intracellular signal transduction | biological_process:regulation of Rho protein signal transduction | biological_process:positive regulation of Rho GTPase activity | biological_process:a…
23229	NM_015185	ARHGEF9	78797	77078	93604	224529	224413	220029	1.23975	1.23975	2.9389	0.0317003	0.0393006	-0.0393006	Cdc42 guanine nucleotide exchange factor (GEF) 9	molecular_function:Rho guanyl-nucleotide exchange factor activity | biological_process:positive regulation of Rho GTPase activity | cellular_component:cytosol | biological_process:small GTPase mediated signal transduction | biological_process:synaptic transmission | biological_process:ion transmembrane transport | biological_process:positive regulation of apoptotic process | biological_process:ne…
9077	NM_004675	ARHI	48984	42350	58367	205345	198058	206029	1.65261	1.65261	0	0.00503477	0.00832053	-0.00832053	DIRAS family, GTP-binding RAS-like 3	biological_process:regulation of cyclin-dependent protein serine/threonine kinase activity | molecular_function:GTPase activity | molecular_function:protein binding | molecular_function:GTP binding | cellular_component:plasma membrane | biological_process:GTP catabolic process | biological_process:regulation of gene expression by genetic imprinting | biological_process:small GTPase mediated signa…
1820	NM_005224	ARID3A	14738	14689	13885	205775	222373	220992	1.01016	1.01016	37.008	0.210227	0.212363	-0.212363	AT rich interactive domain 3A (BRIGHT-like)	molecular_function:protein binding | cellular_component:nucleus | cellular_component:nucleolus | cellular_component:cytoplasm | cellular_component:Golgi apparatus | biological_process:transcription, DNA-templated | cellular_component:membrane raft | molecular_function:DNA binding | cellular_component:intracellular | molecular_function:sequence-specific DNA binding transcription factor activity | …
10620	NM_006465	ARID3B	85899	81287	91456	232040	207902	221655	1.02189	1.02189	33.6721	0.191305	0.195493	-0.195493	AT rich interactive domain 3B (BRIGHT-like)	molecular_function:DNA binding | cellular_component:nucleus | biological_process:transcription, DNA-templated | biological_process:regulation of transcription, DNA-templated | cellular_component:intracellular | biological_process:positive regulation of transcription from RNA polymerase II promoter | molecular_function:RNA polymerase II distal enhancer sequence-specific DNA binding | molecular_fun…
5926	NM_023001	ARID4A	103501	122711	137948	247942	247393	249228	1.44618	1.44618	0.042001	0.0131535	0.0190223	-0.0190223	AT rich interactive domain 4A (RBP1-like)	molecular_function:DNA binding | cellular_component:nucleus | molecular_function:sequence-specific DNA binding transcription factor activity | biological_process:transcription from RNA polymerase II promoter | cellular_component:transcriptional repressor complex | biological_process:negative regulation of transcription, DNA-templated | cellular_component:intracellular | biological_process:histone…
51742	NM_031371	ARID4B	194325	193024	186683	270088	273082	278498	1.03776	1.03776	30.6466	0.0994225	0.103177	-0.103177	AT rich interactive domain 4B (RBP1-like)	molecular_function:DNA binding | cellular_component:nucleus | biological_process:regulation of transcription, DNA-templated | molecular_function:protein binding | cellular_component:cytoplasm | cellular_component:intracellular | biological_process:regulation of gene expression by genetic imprinting | biological_process:histone H4-K20 trimethylation | biological_process:histone H3-K9 trimethylation
10865	NM_212481	ARID5A	139234	126721	94207	253641	264488	254419	1.23457	1.23457	6.35904	0.0659364	0.0814029	-0.0814029	AT rich interactive domain 5A (MRF1-like)	molecular_function:DNA binding | cellular_component:nucleus | cellular_component:nucleolus | molecular_function:protein binding | biological_process:transcription, DNA-templated | biological_process:negative regulation of transcription, DNA-templated | cellular_component:intracellular | molecular_function:chromatin binding | cellular_component:transcription factor complex | biological_process:cho…
84159	NM_032199	ARID5B	23656	25089	22259	247531	238026	245294	1.80614	1.80614	0	0.000135646	0.000244996	-0.000244996	AT rich interactive domain 5B (MRF1-like)	biological_process:liver development | molecular_function:DNA binding | molecular_function:protein binding | cellular_component:nucleus | biological_process:transcription, DNA-templated | molecular_function:transcription regulatory region DNA binding | biological_process:negative regulation of transcription, DNA-templated | biological_process:positive regulation of sequence-specific DNA binding t…
10425	NM_006321	ARIH2	37809	37657	32364	238025	224712	242011	2.7155	2.7155	0	0.000602287	0.00163551	-0.00163551	ariadne RBR E3 ubiquitin protein ligase 2	biological_process:protein polyubiquitination | molecular_function:nucleic acid binding | molecular_function:ubiquitin-protein transferase activity | molecular_function:protein binding | cellular_component:nucleus | cellular_component:cytoplasm | biological_process:multicellular organismal development | molecular_function:zinc ion binding | molecular_function:ligase activity | biological_process:…
9891	NM_014840	ARK5	188564	157911	131727	236607	232415	237764	2.83592	2.83592	0	0.000169741	0.000481372	-0.000481372	NUAK family, SNF1-like kinase, 1	molecular_function:protein serine/threonine kinase activity | molecular_function:ATP binding | biological_process:protein phosphorylation | biological_process:metabolic process | molecular_function:transferase activity, transferring phosphorus-containing groups | molecular_function:p53 binding | molecular_function:protein binding | cellular_component:nucleus | cellular_component:nucleolus | cellu…
400	NM_001177	ARL1	13116	18386	13363	272637	254058	265938	1.45208	1.45208	0.137128	0.0187863	0.0272791	-0.0272791	ADP-ribosylation factor-like 1	molecular_function:GTP binding | biological_process:small GTPase mediated signal transduction | cellular_component:Golgi membrane | molecular_function:GTPase activity | cellular_component:cytoplasm | cellular_component:Golgi apparatus | cellular_component:trans-Golgi network | biological_process:GTP catabolic process | biological_process:Golgi organization | molecular_function:enzyme activator ac…
55207	NM_018184	ARL10C	222295	214155	199637	271197	261796	263354	1.18394	1.18394	2.9389	0.00948853	0.0112338	-0.0112338	ADP-ribosylation factor-like 8B	molecular_function:GTPase activity | molecular_function:GTP binding | cellular_component:cytoplasm | cellular_component:lysosomal membrane | biological_process:GTP catabolic process | biological_process:cell cycle | biological_process:chromosome segregation | biological_process:small GTPase mediated signal transduction | molecular_function:GDP binding | cellular_component:midbody | cellular_compo…
115761	NM_138450	ARL11	54029	66386	89952	266732	264947	275264	1.46317	1.46317	0.00681625	0.00713876	0.0104452	-0.0104452	ADP-ribosylation factor-like 11	molecular_function:protein binding | molecular_function:GTP binding | cellular_component:intracellular | biological_process:small GTPase mediated signal transduction | biological_process:intracellular protein transport | cellular_component:nucleus | cellular_component:cytoplasm | biological_process:hematopoietic progenitor cell differentiation
10124	NM_212460	ARL4A	41032	35082	46774	221262	222943	224956	1.0865	1.0865	16.2507	0.0657626	0.0714511	-0.0714511	ADP-ribosylation factor-like 4A	molecular_function:GTP binding | molecular_function:protein binding | cellular_component:nucleus | cellular_component:nucleolus | cellular_component:cytoplasm | cellular_component:plasma membrane | biological_process:small GTPase mediated signal transduction | molecular_function:GTPase activity | biological_process:protein transport | biological_process:intracellular protein transport | biologica…
379	NM_001661	ARL4D	17535	16311	14325	232376	243366	255242	1.00232	1.00232	37.008	0.232778	0.233318	-0.233318	ADP-ribosylation factor-like 4D	molecular_function:GTPase activity | molecular_function:protein binding | molecular_function:GTP binding | cellular_component:nucleolus | cellular_component:cytoplasm | cellular_component:plasma membrane | biological_process:GTP catabolic process | biological_process:small GTPase mediated signal transduction | biological_process:protein secretion | biological_process:protein transport | biologica…
26225	NM_177985	ARL5	69004	59578	73303	238609	244942	242038	1.13082	1.13082	16.2507	0.120201	0.135926	-0.135926	ADP-ribosylation factor-like 5A	molecular_function:GTP binding | cellular_component:intracellular | biological_process:small GTPase mediated signal transduction | biological_process:intracellular protein transport | cellular_component:nucleus | cellular_component:cytoplasm | molecular_function:GTPase activity | molecular_function:signal transducer activity | molecular_function:guanyl nucleotide binding | molecular_function:G-pr…
64225	NM_022374	ARL6IP2	231112	199023	167825	259274	244283	246399	1.15603	1.15603	6.35904	0.0205563	0.0237638	-0.0237638	atlastin GTPase 2	molecular_function:GTPase activity | molecular_function:protein binding | molecular_function:GTP binding | cellular_component:endoplasmic reticulum | cellular_component:endoplasmic reticulum membrane | biological_process:GTP catabolic process | biological_process:endoplasmic reticulum organization | biological_process:Golgi organization | cellular_component:integral component of membrane | molecu…
221079	NM_178815	ARL8	101250	98863	106184	198345	201180	216209	1.89761	1.89761	0	0.000248793	0.000472112	-0.000472112	ADP-ribosylation factor-like 5B	molecular_function:GTP binding | cellular_component:intracellular | biological_process:small GTPase mediated signal transduction | molecular_function:GTPase activity | molecular_function:signal transducer activity | molecular_function:guanyl nucleotide binding | molecular_function:G-protein beta/gamma-subunit complex binding | biological_process:G-protein coupled receptor signaling pathway | biol…
132946	NM_206919	ARL9	61591	49826	42804	273918	261068	216381	1.42454	1.42454	0.00681625	0.0044482	0.00633666	-0.00633666	ADP-ribosylation factor-like 9	molecular_function:GTP binding | cellular_component:intracellular | biological_process:small GTPase mediated signal transduction
84071	NM_032131	ARMC2	39320	50639	53618	222009	237893	200459	1.3976	1.3976	0.00681625	0.00267198	0.00373437	-0.00373437	armadillo repeat containing 2	molecular_function:protein binding
219681	NM_173081	ARMC3	154149	139591	120886	232916	229251	249861	1.32445	1.32445	0.137128	0.00700514	0.00927796	-0.00927796	armadillo repeat containing 3	cellular_component:extracellular vesicular exosome | molecular_function:protein binding
55130	NM_018076	ARMC4	197455	179892	173599	297901	299755	298242	1.28505	1.28505	0.137128	0.00608197	0.00781563	-0.00781563	armadillo repeat containing 4	cellular_component:nucleus | cellular_component:cytoskeleton | cellular_component:axoneme | biological_process:cell projection organization | cellular_component:ciliary base | molecular_function:protein binding | biological_process:cilium movement | biological_process:ventricular system development | biological_process:outer dynein arm assembly | biological_process:left/right axis specification
51309	NM_016608	ARMCX1	55894	49496	41233	255842	253482	214249	1.07488	1.07488	26.6081	0.170918	0.183717	-0.183717	armadillo repeat containing, X-linked 1	cellular_component:integral component of membrane | molecular_function:protein binding
51566	NM_016607	ARMCX3	150540	145722	102140	226836	230486	224031	1.01634	1.01634	36.0237	0.209673	0.2131	-0.2131	armadillo repeat containing, X-linked 3	molecular_function:protein binding | biological_process:positive regulation of transcription from RNA polymerase II promoter | biological_process:cellular protein localization | cellular_component:integral component of mitochondrial outer membrane
7873	NM_006010	ARMET	189536	210169	182678	284817	294471	294389	1.14467	1.14467	2.9389	0.00235333	0.00269379	-0.00269379	mesencephalic astrocyte-derived neurotrophic factor	cellular_component:nucleus | biological_process:response to unfolded protein | molecular_function:growth factor activity | molecular_function:poly(A) RNA binding | molecular_function:poly(A) RNA binding | molecular_function:poly(A) RNA binding | molecular_function:poly(A) RNA binding | molecular_function:poly(A) RNA binding | molecular_function:poly(A) RNA binding | molecular_function:poly(A) RNA…
441549	NM_001029954	ARMETL1	214956	246685	230258	229276	244231	247374	1.03921	1.03921	30.6466	0.147282	0.153057	-0.153057	cerebral dopamine neurotrophic factor	cellular_component:extracellular region | molecular_function:growth factor activity
405	NM_001668	ARNT	20903	22160	23784	294589	314219	310598	1.00812	1.00812	37.008	0.225984	0.227819	-0.227819	aryl hydrocarbon receptor nuclear translocator	biological_process:response to hypoxia | biological_process:positive regulation of endothelial cell proliferation | molecular_function:sequence-specific DNA binding transcription factor activity | molecular_function:protein binding | cellular_component:nucleus | cellular_component:nucleoplasm | cellular_component:transcription factor complex | biological_process:transcription, DNA-templated | mol…
406	NM_001178	ARNTL	84039	86170	91374	210777	213829	194818	1.10179	1.10179	16.2507	0.0417955	0.0460499	-0.0460499	aryl hydrocarbon receptor nuclear translocator-like	molecular_function:protein dimerization activity | cellular_component:cytoplasm | molecular_function:transcription regulatory region sequence-specific DNA binding | molecular_function:RNA polymerase II core promoter proximal region sequence-specific DNA binding transcription factor activity | molecular_function:core promoter binding | molecular_function:signal transducer activity | molecular_func…
56938	NM_020183	ARNTL2	23620	22748	18394	257924	250626	228928	1.55809	1.55809	0.00681625	0.0142801	0.0222496	-0.0222496	aryl hydrocarbon receptor nuclear translocator-like 2	molecular_function:RNA polymerase II core promoter proximal region sequence-specific DNA binding transcription factor activity | molecular_function:signal transducer activity | cellular_component:nucleus | cellular_component:transcription factor complex | cellular_component:nucleolus | cellular_component:cytoplasm | biological_process:regulation of transcription, DNA-templated | biological_proces…
164668	NM_181773	ARP10	203512	191391	199379	258179	255113	242994	1.151	1.151	2.9389	0.00462311	0.00532121	-0.00532121	apolipoprotein B mRNA editing enzyme, catalytic polypeptide-like 3H	cellular_component:cytoplasmic mRNA processing body | molecular_function:cytidine deaminase activity | molecular_function:protein binding | cellular_component:nucleus | molecular_function:zinc ion binding | biological_process:cytidine deamination | biological_process:negative regulation of transposition | biological_process:innate immune response | biological_process:negative regulation of single…
57180	NM_001040135	ARP3BETA	85208	92420	98323	258665	251055	240150	1.10846	1.10846	11.095	0.0308046	0.0341456	-0.0341456	ARP3 actin-related protein 3 homolog B (yeast)	molecular_function:molecular_function | molecular_function:actin binding | molecular_function:ATP binding | cellular_component:cellular_component | cellular_component:cytoplasm | cellular_component:cytoskeleton | biological_process:biological_process | cellular_component:cell projection
10094	NM_005719	ARPC3	42644	37602	54728	203618	188995	194190	1.46674	1.46674	0	0.00154231	0.00226217	-0.00226217	actin related protein 2/3 complex, subunit 3, 21kDa	cellular_component:Arp2/3 protein complex | biological_process:Arp2/3 complex-mediated actin nucleation | molecular_function:actin binding | molecular_function:structural constituent of cytoskeleton | molecular_function:protein binding | cellular_component:cytosol | biological_process:cellular component movement | cellular_component:actin cytoskeleton | cellular_component:membrane | biological_pr…
10093	NM_001024960	ARPC4	19095	19289	19317	215866	219979	219848	1.75417	1.75417	0	0.000209531	0.000367553	-0.000367553	actin related protein 2/3 complex, subunit 4, 20kDa	cellular_component:Arp2/3 protein complex | biological_process:actin filament polymerization | biological_process:Arp2/3 complex-mediated actin nucleation | molecular_function:protein binding | cellular_component:cytosol | molecular_function:enzyme binding | biological_process:Fc-gamma receptor signaling pathway involved in phagocytosis | cellular_component:cell projection | biological_process:in…
81873	NM_030978	ARPC5L	57423	69694	84005	249068	264178	262232	1.61281	1.61281	0	0.000390795	0.000630277	-0.000630277	actin related protein 2/3 complex, subunit 5-like	molecular_function:molecular_function | molecular_function:actin binding | cellular_component:cytoplasm | cellular_component:cytoskeleton | biological_process:biological_process | biological_process:regulation of actin filament polymerization | cellular_component:extracellular vesicular exosome | biological_process:Arp2/3 complex-mediated actin nucleation | cellular_component:Arp2/3 protein compl…
10776	NM_006628	ARPP-19	18816	16210	15507	255824	246671	259964	1.43583	1.43583	0.137128	0.026671	0.038295	-0.038295	cAMP-regulated phosphoprotein, 19kDa	biological_process:G2/M transition of mitotic cell cycle | molecular_function:protein phosphatase inhibitor activity | molecular_function:receptor binding | cellular_component:nucleoplasm | cellular_component:cytoplasm | biological_process:mitotic nuclear division | molecular_function:protein phosphatase type 2A regulator activity | molecular_function:potassium channel regulator activity | biolog…
408	NM_020251	ARRB1	196663	212187	191233	287292	282767	291598	1.16519	1.16519	2.9389	0.00919276	0.0107113	-0.0107113	arrestin, beta 1	cellular_component:Golgi membrane | cellular_component:chromatin | biological_process:positive regulation of protein phosphorylation | biological_process:G-protein coupled receptor internalization | biological_process:positive regulation of receptor internalization | molecular_function:enzyme inhibitor activity | molecular_function:GTPase activator activity | molecular_function:insulin-like growt…
409	NM_004313	ARRB2	286711	281831	258727	317485	312986	324976	1.01214	1.01214	36.0237	0.164854	0.166854	-0.166854	arrestin, beta 2	molecular_function:G-protein coupled receptor binding | biological_process:G-protein coupled receptor internalization | biological_process:desensitization of G-protein coupled receptor protein signaling pathway by arrestin | biological_process:positive regulation of receptor internalization | molecular_function:protein binding | cellular_component:nucleus | cellular_component:cytoplasm | cellular…
92714	NM_152285	ARRDC1	179306	175930	144654	257772	255390	247032	1.32682	1.32682	0.042001	0.00322604	0.00428036	-0.00428036	arrestin domain containing 1	cellular_component:plasma membrane | cellular_component:cytoplasmic vesicle | cellular_component:extracellular vesicular exosome
57152	NM_020427	ARS	96670	95503	88850	226437	218541	216980	1.38306	1.38306	0	0.00113859	0.00157474	-0.00157474	secreted LY6/PLAUR domain containing 1	biological_process:cell activation | molecular_function:cytokine activity | cellular_component:extracellular region | cellular_component:extracellular space | biological_process:cell adhesion | cellular_component:extracellular vesicular exosome
51593	NM_015908	ARS2	154072	152073	115857	224534	244771	222526	1.06798	1.06798	21.6065	0.0846562	0.0904108	-0.0904108	serrate, RNA effector molecule	molecular_function:DNA binding | molecular_function:protein binding | cellular_component:nucleoplasm | cellular_component:cytoplasm | biological_process:transcription, DNA-templated | biological_process:regulation of transcription, DNA-templated | biological_process:cell proliferation | biological_process:primary miRNA processing | molecular_function:poly(A) RNA binding | molecular_function:poly(…
410	NM_001085428	ARSA	243208	77414	86832	238944	236984	224959	1.34859	1.34859	11.095	0.120273	0.162198	-0.162198	arylsulfatase A	molecular_function:catalytic activity | biological_process:metabolic process | molecular_function:cerebroside-sulfatase activity | molecular_function:calcium ion binding | cellular_component:lysosome | cellular_component:endoplasmic reticulum lumen | biological_process:sphingolipid metabolic process | biological_process:glycosphingolipid metabolic process | molecular_function:sulfuric ester hydro…
411	NM_198709	ARSB	29670	28914	26843	199508	197798	206781	2.4185	2.4185	0	0.000320759	0.000775755	-0.000775755	arylsulfatase B	molecular_function:N-acetylgalactosamine-4-sulfatase activity | cellular_component:lysosome | cellular_component:endoplasmic reticulum lumen | biological_process:carbohydrate metabolic process | biological_process:sphingolipid metabolic process | biological_process:glycosphingolipid metabolic process | biological_process:lysosome organization | biological_process:lysosomal transport | biological_…
415	NM_000047	ARSE	84383	85181	91345	248877	232297	238800	2.11801	2.11801	0	0.000735584	0.00155798	-0.00155798	arylsulfatase E (chondrodysplasia punctata 1)	biological_process:metabolic process | molecular_function:sulfuric ester hydrolase activity | biological_process:skeletal system development | molecular_function:arylsulfatase activity | cellular_component:endoplasmic reticulum lumen | cellular_component:Golgi stack | biological_process:sphingolipid metabolic process | biological_process:glycosphingolipid metabolic process | biological_process:po…
416	NM_004042	ARSF	22945	19440	18070	221907	225638	234146	1.91825	1.91825	0	0.00592144	0.0113588	-0.0113588	arylsulfatase F	molecular_function:arylsulfatase activity | cellular_component:endoplasmic reticulum lumen | biological_process:sphingolipid metabolic process | biological_process:glycosphingolipid metabolic process | biological_process:post-translational protein modification | biological_process:cellular protein metabolic process | biological_process:small molecule metabolic process | molecular_function:metal i…
419	NM_001179	ART3	162291	175725	174142	240157	255994	246047	2.13715	2.13715	0	0.000985998	0.00210723	-0.00210723	ADP-ribosyltransferase 3	molecular_function:NAD(P)+-protein-arginine ADP-ribosyltransferase activity | molecular_function:NAD(P)+-protein-arginine ADP-ribosyltransferase activity | molecular_function:NAD(P)+-protein-arginine ADP-ribosyltransferase activity | molecular_function:NAD(P)+-protein-arginine ADP-ribosyltransferase activity | molecular_function:NAD(P)+-protein-arginine ADP-ribosyltransferase activity | molecular…
64801	NM_022786	ARV1	191471	168008	145117	262962	244765	249020	1.2867	1.2867	0.042001	0.00153934	0.00198066	-0.00198066	ARV1 homolog (S. cerevisiae)	biological_process:sphingolipid metabolic process | cellular_component:integral component of membrane | biological_process:bile acid metabolic process | biological_process:cholesterol transport | biological_process:regulation of cholesterol metabolic process
421	NM_001670	ARVCF	130362	117446	127274	212351	211400	208800	1.19144	1.19144	2.9389	0.0246448	0.0293628	-0.0293628	armadillo repeat gene deleted in velocardiofacial syndrome	molecular_function:protein binding | cellular_component:intracellular | biological_process:cell adhesion | biological_process:multicellular organismal development | biological_process:single organismal cell-cell adhesion | biological_process:calcium-dependent cell-cell adhesion | cellular_component:plasma membrane | cellular_component:cytoplasm | cellular_component:nucleus
170302	NM_139058	ARX	246582	263296	270798	259130	279105	265052	1.15256	1.15256	2.9389	0.00450848	0.00519631	-0.00519631	aristaless related homeobox	molecular_function:sequence-specific DNA binding transcription factor activity | cellular_component:nucleus | biological_process:transcription, DNA-templated | biological_process:regulation of transcription, DNA-templated | molecular_function:chromatin binding | biological_process:negative regulation of transcription from RNA polymerase II promoter | biological_process:neuron migration | biologic…
57412	NM_020682	AS3MT	42527	44373	43977	175686	198015	183349	1.02555	1.02555	33.6721	0.175145	0.17962	-0.17962	arsenite methyltransferase	cellular_component:cytosol | biological_process:toxin metabolic process | biological_process:arsonoacetate metabolic process | molecular_function:arsenite methyltransferase activity | molecular_function:methylarsonite methyltransferase activity | biological_process:methylation | molecular_function:protein-L-isoaspartate (D-aspartate) O-methyltransferase activity | molecular_function:protein-L-iso…
427	NM_004315	ASAH1	61551	43983	69270	236516	248122	241846	1.18374	1.18374	11.095	0.0937201	0.11094	-0.11094	N-acylsphingosine amidohydrolase (acid ceramidase) 1	molecular_function:catalytic activity | biological_process:sphingolipid metabolic process | biological_process:ceramide metabolic process | biological_process:glycosphingolipid metabolic process | biological_process:cell death | molecular_function:ceramidase activity | cellular_component:lysosomal lumen | biological_process:small molecule metabolic process | cellular_component:extracellular vesic…
340485	NM_001010887	ASAH3L	112163	123203	152998	168269	193353	202840	1.07585	1.07585	21.6065	0.0804683	0.0865717	-0.0865717	alkaline ceramidase 2	cellular_component:Golgi membrane | biological_process:negative regulation of cell-matrix adhesion | cellular_component:Golgi apparatus | biological_process:sphingolipid metabolic process | biological_process:ceramide metabolic process | biological_process:activation of cysteine-type endopeptidase activity involved in apoptotic process | biological_process:positive regulation of cell proliferatio…
136371	NM_080871	ASB10	45553	41781	47852	228080	229703	214868	2.4912	2.4912	0	0.000129418	0.000322406	-0.000322406	ankyrin repeat and SOCS box containing 10	biological_process:protein ubiquitination | biological_process:intracellular signal transduction | cellular_component:nucleus | cellular_component:cytoplasm | molecular_function:protein binding
140456	NM_001012428	ASB11	44612	38447	35479	220522	213521	220889	2.64096	2.64096	0	0.000271059	0.000715857	-0.000715857	ankyrin repeat and SOCS box containing 11, E3 ubiquitin protein ligase	biological_process:protein ubiquitination | biological_process:intracellular signal transduction | molecular_function:protein binding
142689	NM_130388	ASB12	25260	15764	12940	203214	209476	201090	1.23749	1.23749	2.9389	0.0581899	0.0720093	-0.0720093	ankyrin repeat and SOCS box containing 12	biological_process:protein ubiquitination | biological_process:intracellular signal transduction | molecular_function:protein binding
79754	NM_024701	ASB13	26928	25022	24995	201109	196873	199741	1.00883	1.00883	37.008	0.225984	0.22798	-0.22798	ankyrin repeat and SOCS box containing 13	molecular_function:protein binding | biological_process:protein ubiquitination | biological_process:intracellular signal transduction
142686	NM_130387	ASB14	38057	37070	34883	160050	163933	145785	2.71611	2.71611	0	8.66e-05	0.000235215	-0.000235215	ankyrin repeat and SOCS box containing 14	biological_process:protein ubiquitination | biological_process:intracellular signal transduction | molecular_function:protein binding
142685	NM_080928	ASB15	39029	29052	39248	204452	204568	217698	1.36013	1.36013	0.137128	0.0134748	0.0183274	-0.0183274	ankyrin repeat and SOCS box containing 15	biological_process:protein ubiquitination | biological_process:intracellular signal transduction | molecular_function:protein binding
92591	NM_080863	ASB16	25708	23356	17021	184858	182094	182723	1.46981	1.46981	0.00681625	0.0073456	0.0107966	-0.0107966	ankyrin repeat and SOCS box containing 16	molecular_function:protein binding | biological_process:protein ubiquitination | biological_process:intracellular signal transduction
127247	NM_080868	ASB17	50001	48560	40751	245147	235356	254082	1.48188	1.48188	0.00681625	0.0108854	0.0161308	-0.0161308	ankyrin repeat and SOCS box containing 17	biological_process:protein ubiquitination | biological_process:intracellular signal transduction
401036	NM_212556	ASB18	27043	21775	22250	206677	199556	189105	1.19129	1.19129	2.9389	0.0199241	0.0237353	-0.0237353	ankyrin repeat and SOCS box containing 18	biological_process:protein ubiquitination | biological_process:intracellular signal transduction | molecular_function:protein binding
51676	NM_016150	ASB2	31633	27342	28667	183292	171757	198967	1.96301	1.96301	0	0.000145871	0.000286346	-0.000286346	ankyrin repeat and SOCS box containing 2	biological_process:intracellular signal transduction | molecular_function:protein binding | molecular_function:ubiquitin-protein transferase activity | biological_process:protein ubiquitination involved in ubiquitin-dependent protein catabolic process | biological_process:skeletal muscle cell differentiation | biological_process:protein polyubiquitination | biological_process:myoblast differentia…
51130	NM_016115	ASB3	36329	26923	33970	193499	189160	201524	1.29499	1.29499	0.137128	0.00421044	0.0054525	-0.0054525	ankyrin repeat and SOCS box containing 3	biological_process:protein ubiquitination | biological_process:intracellular signal transduction | molecular_function:protein binding
51666	NM_016116	ASB4	15896	15400	9720	185977	170547	177979	1.1077	1.1077	21.6065	0.146966	0.162794	-0.162794	ankyrin repeat and SOCS box containing 4	cellular_component:Cul2-RING ubiquitin ligase complex | cellular_component:Cul5-RING ubiquitin ligase complex | biological_process:intracellular signal transduction | biological_process:positive regulation of vasculogenesis | molecular_function:protein binding | molecular_function:ubiquitin protein ligase binding | molecular_function:ubiquitin-protein transferase activity | biological_process:pro…
140459	NM_017873	ASB6	74968	62192	61223	222018	212931	220899	3.01873	3.01873	0	5.55e-05	0.00016754	-0.00016754	ankyrin repeat and SOCS box containing 6	cellular_component:cytoplasm | biological_process:protein ubiquitination | biological_process:intracellular signal transduction | molecular_function:protein binding
140461	NM_024095	ASB8	33406	23579	24890	216218	198650	217053	1.2839	1.2839	0.443512	0.0215498	0.0276679	-0.0276679	ankyrin repeat and SOCS box containing 8	cellular_component:cytoplasm | biological_process:protein ubiquitination | biological_process:intracellular signal transduction | molecular_function:protein binding
140462	NM_024087	ASB9	30361	26908	30382	241990	230716	232204	1.81989	1.81989	0	0.00643842	0.0117172	-0.0117172	ankyrin repeat and SOCS box containing 9	molecular_function:protein binding | cellular_component:mitochondrion | biological_process:protein ubiquitination | biological_process:intracellular signal transduction | biological_process:positive regulation of protein catabolic process
29108	NM_013258	ASC	42590	36054	43141	221716	210376	219036	1.26521	1.26521	2.9389	0.0602471	0.0762252	-0.0762252	PYD and CARD domain containing	biological_process:myeloid dendritic cell activation | biological_process:activation of innate immune response | biological_process:myeloid dendritic cell activation involved in immune response | biological_process:positive regulation of antigen processing and presentation of peptide antigen via MHC class II | biological_process:positive regulation of adaptive immune response | molecular_function…
84164	NM_032204	ASC1P100	229489	215173	172373	245077	249223	257366	1.12837	1.12837	16.2507	0.0846475	0.0955133	-0.0955133	activating signal cointegrator 1 complex subunit 2	biological_process:transcription, DNA-templated | biological_process:regulation of transcription, DNA-templated | molecular_function:protein binding
429	NM_004316	ASCL1	42367	43530	46511	199053	179568	192646	1.30034	1.30034	0.443512	0.0127657	0.0165997	-0.0165997	achaete-scute family bHLH transcription factor 1	molecular_function:transcription factor binding transcription factor activity | biological_process:noradrenergic neuron development | biological_process:noradrenergic neuron fate commitment | molecular_function:DNA binding | molecular_function:sequence-specific DNA binding transcription factor activity | molecular_function:protein binding | cellular_component:nucleus | biological_process:transcri…
430	NM_005170	ASCL2	159070	178651	165411	266939	270237	237253	1.3552	1.3552	0.042001	0.00849762	0.011516	-0.011516	achaete-scute family bHLH transcription factor 2	biological_process:negative regulation of transcription from RNA polymerase II promoter | biological_process:response to hypoxia | biological_process:placenta development | molecular_function:sequence-specific DNA binding transcription factor activity | cellular_component:nucleus | cellular_component:cytoplasm | biological_process:transcription, DNA-templated | biological_process:regulation of tr…
10849	NM_012099	ASE-1	172080	156258	144631	200282	185165	193111	1.12945	1.12945	11.095	0.0466192	0.0526539	-0.0526539	CD3e molecule, epsilon associated protein	cellular_component:RNA polymerase I transcription factor complex | molecular_function:DNA-directed RNA polymerase activity | cellular_component:nucleus | cellular_component:chromosome | cellular_component:nucleolus | cellular_component:cytoplasm | cellular_component:mitochondrion | biological_process:transmembrane receptor protein tyrosine kinase signaling pathway | molecular_function:poly(A) RNA…
25842	NM_014034	ASF1A	13198	12435	11601	253159	237341	208318	1.55682	1.55682	0	0.000196684	0.000306201	-0.000306201	anti-silencing function 1A histone chaperone	cellular_component:nuclear chromatin | molecular_function:chromatin binding | molecular_function:protein binding | cellular_component:nucleus | cellular_component:nucleoplasm | biological_process:DNA repair | biological_process:nucleosome assembly | biological_process:DNA replication-dependent nucleosome assembly | biological_process:DNA replication-independent nucleosome assembly | biological_pr…
433	NM_080914	ASGR2	122068	106752	106196	239543	232642	220365	1.02933	1.02933	37.008	0.228344	0.235041	-0.235041	asialoglycoprotein receptor 2	molecular_function:asialoglycoprotein receptor activity | molecular_function:protein binding | biological_process:receptor-mediated endocytosis | biological_process:cell surface receptor signaling pathway | cellular_component:integral component of membrane | molecular_function:carbohydrate binding | biological_process:glycoprotein metabolic process | biological_process:regulation of protein stabi…
55870	NM_018489	ASH1L	191008	104934	88724	186792	168358	168405	1.81303	1.81303	0.042001	0.0325007	0.0589248	-0.0589248	ash1 (absent, small, or homeotic)-like (Drosophila)	molecular_function:DNA binding | molecular_function:chromatin binding | cellular_component:nucleus | cellular_component:chromosome | cellular_component:cytoplasm | cellular_component:Golgi apparatus | cellular_component:tight junction | biological_process:DNA packaging | biological_process:regulation of transcription, DNA-templated | biological_process:transcription from RNA polymerase II promote…
10926	NM_006716	ASK	67702	77918	74902	253256	233253	227455	1.07048	1.07048	30.6466	0.183123	0.196029	-0.196029	DBF4 zinc finger	biological_process:G1/S transition of mitotic cell cycle | molecular_function:nucleic acid binding | cellular_component:nucleoplasm | biological_process:DNA replication | molecular_function:enzyme activator activity | molecular_function:zinc ion binding | biological_process:positive regulation of catalytic activity | cellular_component:nucleus
435	NM_000048	ASL	73539	62849	77824	230082	241285	233590	1.63502	1.63502	0	0.00307262	0.0050238	-0.0050238	argininosuccinate lyase	biological_process:urea cycle | molecular_function:argininosuccinate lyase activity | cellular_component:cytoplasm | cellular_component:cytosol | biological_process:internal protein amino acid acetylation | biological_process:arginine catabolic process | biological_process:cellular nitrogen compound metabolic process | biological_process:arginine biosynthetic process via ornithine | biological_pr…
8623	NM_004192	ASMTL	44065	39974	46322	150127	135447	150691	1.72566	1.72566	0	0.000809209	0.00139642	-0.00139642	acetylserotonin O-methyltransferase-like	molecular_function:molecular_function | cellular_component:cytoplasm | biological_process:biological_process | molecular_function:O-methyltransferase activity | biological_process:methylation
439	NM_004317	ASNA1	73993	59934	63149	235354	231047	230651	1.64616	1.64616	0.00681625	0.0124229	0.0204501	-0.0204501	arsA arsenite transporter, ATP-binding, homolog 1 (bacterial)	molecular_function:ATP binding | cellular_component:nucleus | cellular_component:nucleolus | biological_process:ATP catabolic process | molecular_function:ATPase activity | molecular_function:transporter activity | cellular_component:cytoplasm | cellular_component:endoplasmic reticulum | molecular_function:arsenite transmembrane transporter activity | biological_process:inorganic anion transport …
440	NM_001673	ASNS	73835	75670	87170	268785	266133	291473	1.93954	1.93954	0	0.00155224	0.00301063	-0.00301063	asparagine synthetase (glutamine-hydrolyzing)	molecular_function:asparagine synthase (glutamine-hydrolyzing) activity | molecular_function:asparagine synthase (glutamine-hydrolyzing) activity | molecular_function:asparagine synthase (glutamine-hydrolyzing) activity | molecular_function:asparagine synthase (glutamine-hydrolyzing) activity | molecular_function:asparagine synthase (glutamine-hydrolyzing) activity | molecular_function:asparagine…
443	NM_000049	ASPA	17439	23311	19679	279433	275225	281593	1.8629	1.8629	0	0.00943662	0.0175795	-0.0175795	aspartoacylase	cellular_component:cytoplasm | biological_process:metabolic process | molecular_function:hydrolase activity, acting on ester bonds | molecular_function:aminoacylase activity | cellular_component:nucleus | biological_process:aspartate catabolic process | molecular_function:aspartoacylase activity | molecular_function:metal ion binding | cellular_component:extracellular vesicular exosome | molecula…
79058	NM_024083	ASPSCR1	63811	56806	65322	257099	251542	259792	1.18776	1.18776	6.35904	0.0629255	0.0747405	-0.0747405	alveolar soft part sarcoma chromosome region, candidate 1	molecular_function:molecular_function | molecular_function:protein binding | cellular_component:cellular_component | cellular_component:nucleus | biological_process:biological_process | cellular_component:endomembrane system | biological_process:membrane organization | biological_process:glucose homeostasis | cellular_component:cytosol | cellular_component:perinuclear region of cytoplasm | cellul…
431705	NM_001002036	ASTL	76039	80303	107483	186947	187175	193349	1.4154	1.4154	21.6065	0.169728	0.240234	-0.240234	astacin-like metallo-endopeptidase (M12 family)	molecular_function:metalloendopeptidase activity | cellular_component:cytoplasm | cellular_component:plasma membrane | biological_process:proteolysis | biological_process:cell adhesion | molecular_function:zinc ion binding | biological_process:fertilization | biological_process:positive regulation of protein processing | cellular_component:transport vesicle | biological_process:prevention of poly…
84896	NM_032810	ATAD1	18101	18448	14616	210127	195867	211679	1.86554	1.86554	0	0.00228397	0.00426083	-0.00426083	ATPase family, AAA domain containing 1	biological_process:positive regulation of receptor internalization | molecular_function:ATP binding | cellular_component:peroxisomal membrane | biological_process:learning | biological_process:memory | molecular_function:ATPase activity | cellular_component:cell junction | cellular_component:postsynaptic membrane | biological_process:negative regulation of synaptic transmission, glutamatergic | m…
55210	NM_018188	ATAD3A	82633	97597	76978	272820	295283	289784	1.10038	1.10038	16.2507	0.0906973	0.0998012	-0.0998012	ATPase family, AAA domain containing 3A	molecular_function:ATP binding | cellular_component:mitochondrion | cellular_component:mitochondrial inner membrane | biological_process:metabolic process | cellular_component:integral component of membrane | biological_process:cell growth | molecular_function:nucleoside-triphosphatase activity | cellular_component:mitochondrial nucleoid | biological_process:negative regulation of apoptotic proce…
463	NM_006885	ATBF1	171836	308953	166020	270058	257448	266989	2.08578	2.08578	0	0.00832145	0.0173567	-0.0173567	zinc finger homeobox 3	biological_process:negative regulation of transcription from RNA polymerase II promoter | molecular_function:sequence-specific DNA binding transcription factor activity | molecular_function:RNA polymerase II distal enhancer sequence-specific DNA binding transcription factor activity | cellular_component:nucleus | cellular_component:transcription factor complex | biological_process:regulation of t…
11101	NM_007041	ATE1	46724	46558	64872	235786	231977	239022	1.462	1.462	0	0.000551743	0.000806648	-0.000806648	arginyltransferase 1	molecular_function:arginyltransferase activity | molecular_function:protein binding | cellular_component:nucleus | cellular_component:cytoplasm | biological_process:protein arginylation
1386	NM_001880	ATF2	78884	89548	87214	246670	243272	237093	1.02597	1.02597	36.0237	0.214367	0.219934	-0.219934	activating transcription factor 2	cellular_component:nucleus | molecular_function:metal ion binding | molecular_function:RNA polymerase II regulatory region sequence-specific DNA binding | molecular_function:RNA polymerase II distal enhancer sequence-specific DNA binding | molecular_function:RNA polymerase II transcription factor binding transcription factor activity | molecular_function:RNA polymerase II activating transcription…
467	NM_001030287	ATF3	18147	15455	12677	196955	184645	188075	2.08758	2.08758	0	0.00482255	0.0100675	-0.0100675	activating transcription factor 3	molecular_function:sequence-specific DNA binding transcription factor activity | cellular_component:nucleus | cellular_component:nucleolus | biological_process:regulation of transcription, DNA-templated | molecular_function:RNA polymerase II regulatory region sequence-specific DNA binding | molecular_function:RNA polymerase II transcription regulatory region sequence-specific DNA binding transcri…
22809	NM_012068	ATF5	70713	78239	83244	215174	223451	218415	1.38505	1.38505	0.00681625	0.00369693	0.00512042	-0.00512042	activating transcription factor 5	molecular_function:RNA polymerase II regulatory region sequence-specific DNA binding | molecular_function:RNA polymerase II transcription regulatory region sequence-specific DNA binding transcription factor activity involved in positive regulation of transcription | molecular_function:transcription corepressor activity | molecular_function:protein binding | cellular_component:nucleus | cellular_c…
22926	NM_007348	ATF6	36059	252545	48041	217968	214283	218833	2.14507	2.14507	1.21626	0.0860545	0.184593	-0.184593	activating transcription factor 6	cellular_component:Golgi membrane | molecular_function:sequence-specific DNA binding transcription factor activity | molecular_function:transcription coactivator activity | molecular_function:protein binding | cellular_component:nucleus | cellular_component:nuclear envelope | cellular_component:nucleoplasm | cellular_component:endoplasmic reticulum membrane | biological_process:transcription, DNA…
11016	NM_006856	ATF7	13739	16294	13235	219373	220333	208994	1.32439	1.32439	0.443512	0.020364	0.0269698	-0.0269698	activating transcription factor 7	molecular_function:nucleic acid binding | molecular_function:metal ion binding | molecular_function:sequence-specific DNA binding transcription factor activity | molecular_function:protein binding | cellular_component:nucleus | cellular_component:nucleoplasm | cellular_component:cytoplasm | biological_process:transcription, DNA-templated | biological_process:regulation of transcription, DNA-templ…
9140	NM_004707	ATG12	13948	12679	11446	250422	243187	257419	1.09853	1.09853	26.6081	0.162305	0.178297	-0.178297	autophagy related 12	biological_process:autophagic vacuole assembly | cellular_component:cytoplasm | biological_process:mitochondrion degradation | molecular_function:protein binding | biological_process:C-terminal protein lipidation | biological_process:cellular response to nitrogen starvation | molecular_function:Atg8 ligase activity | biological_process:negative regulation of type I interferon production | cellula…
55054	NM_017974	ATG16L1	52277	51272	66588	278726	285622	283277	1.25659	1.25659	0.443512	0.00986793	0.0124	-0.0124	autophagy related 16-like 1 (S. cerevisiae)	biological_process:autophagic vacuole assembly | molecular_function:protein binding | cellular_component:axoneme | biological_process:protein transport | cellular_component:pre-autophagosomal structure membrane | molecular_function:identical protein binding | biological_process:protein homooligomerization | cellular_component:autophagic vacuole membrane | biological_process:negative stranded vira…
23192	NM_013325	ATG4B	13725	11602	19967	244911	208602	206300	1.18631	1.18631	11.095	0.0888184	0.105366	-0.105366	autophagy related 4B, cysteine peptidase	cellular_component:cytoplasm | biological_process:proteolysis | biological_process:autophagy | molecular_function:cysteine-type peptidase activity | biological_process:protein transport | biological_process:autophagic vacuole assembly | molecular_function:endopeptidase activity | molecular_function:protein binding | biological_process:positive regulation of autophagy | biological_process:positive…
84938	NM_032852	ATG4C	31619	27084	19125	193793	201770	216005	1.39331	1.39331	0.443512	0.0388576	0.0541408	-0.0541408	autophagy related 4C, cysteine peptidase	cellular_component:cytoplasm | biological_process:proteolysis | biological_process:autophagy | molecular_function:cysteine-type peptidase activity | biological_process:protein transport | biological_process:autophagic vacuole assembly | molecular_function:cysteine-type endopeptidase activity | cellular_component:extracellular region | cellular_component:cytosol | biological_process:protein target…
84971	NM_032885	ATG4D	18804	18498	12445	209425	210661	224482	1.07389	1.07389	21.6065	0.103238	0.110866	-0.110866	autophagy related 4D, cysteine peptidase	cellular_component:cytoplasm | biological_process:proteolysis | biological_process:autophagy | molecular_function:cysteine-type peptidase activity | biological_process:protein transport | molecular_function:cysteine-type endopeptidase activity | cellular_component:mitochondrial matrix | biological_process:apoptotic process
9474	NM_004849	ATG5	82582	87930	154167	244550	248404	255793	1.28178	1.28178	26.6081	0.192852	0.247193	-0.247193	autophagy related 5	biological_process:autophagic vacuole assembly | molecular_function:protein binding | cellular_component:cytoplasm | cellular_component:axoneme | biological_process:autophagy | biological_process:apoptotic process | cellular_component:membrane | biological_process:negative regulation of type I interferon production | cellular_component:pre-autophagosomal structure membrane | biological_process:po…
10533	NM_006395	ATG7	74583	99427	105542	218081	197779	213244	1.50427	1.50427	0.443512	0.0472443	0.0710683	-0.0710683	autophagy related 7	cellular_component:cytoplasm | biological_process:autophagy | cellular_component:pre-autophagosomal structure | biological_process:mitochondrion degradation | molecular_function:protein binding | cellular_component:cytosol | cellular_component:axoneme | biological_process:cellular protein modification process | biological_process:protein lipidation | biological_process:C-terminal protein lipidati…
79065	NM_024085	ATG9A	86625	86042	91307	174652	161928	177813	2.31308	2.31308	0	0.0011874	0.00274655	-0.00274655	autophagy related 9A	biological_process:autophagic vacuole assembly | cellular_component:pre-autophagosomal structure | cellular_component:autophagic vacuole membrane | biological_process:mitochondrion degradation | molecular_function:protein binding | cellular_component:endosome | cellular_component:endoplasmic reticulum membrane | cellular_component:trans-Golgi network | biological_process:protein transport | cellu…
220202	NM_145178	ATOH7	75116	67082	69927	203388	203563	205610	1.66636	1.66636	0	0.00564781	0.00941129	-0.00941129	atonal homolog 7 (Drosophila)	biological_process:neural retina development | molecular_function:DNA binding | cellular_component:nucleus | biological_process:transcription, DNA-templated | biological_process:regulation of transcription, DNA-templated | biological_process:optic nerve development | biological_process:cell differentiation | molecular_function:protein dimerization activity | biological_process:circadian rhythm | …
84913	NM_032827	ATOH8	153573	78675	84256	235871	246475	240842	1.41042	1.41042	0	6.54e-05	9.22413e-05	-9.22413e-05	atonal homolog 8 (Drosophila)	molecular_function:DNA binding | cellular_component:nucleus | biological_process:transcription, DNA-templated | biological_process:regulation of transcription, DNA-templated | biological_process:nervous system development | biological_process:cell differentiation | molecular_function:protein dimerization activity
475	NM_004045	ATOX1	122154	108074	100695	246455	227526	236222	1.06144	1.06144	26.6081	0.151704	0.161025	-0.161025	antioxidant 1 copper chaperone	biological_process:metal ion transport | molecular_function:metal ion binding | molecular_function:copper ion binding | cellular_component:cytosol | biological_process:copper ion transport | molecular_function:metallochaperone activity | molecular_function:copper chaperone activity | molecular_function:copper-dependent protein binding | biological_process:cellular copper ion homeostasis | cellula…
57194	NM_024490	ATP10A	71354	69484	110564	199852	189499	206818	2.24534	2.24534	0	0.000904702	0.00203136	-0.00203136	ATPase, class V, type 10A	molecular_function:magnesium ion binding | molecular_function:phospholipid-translocating ATPase activity | molecular_function:protein binding | molecular_function:ATP binding | cellular_component:endoplasmic reticulum | cellular_component:endoplasmic reticulum membrane | cellular_component:plasma membrane | biological_process:cation transport | biological_process:metabolic process | biological_pr…
23120	NM_025153	ATP10B	31667	27077	29182	263164	258771	270927	1.89968	1.89968	0	0.000681601	0.00129483	-0.00129483	ATPase, class V, type 10B	molecular_function:magnesium ion binding | molecular_function:phospholipid-translocating ATPase activity | molecular_function:protein binding | molecular_function:ATP binding | cellular_component:endoplasmic reticulum | cellular_component:endoplasmic reticulum membrane | biological_process:cation transport | biological_process:metabolic process | cellular_component:integral component of membrane …
57205	NM_020453	ATP10D	12099	20346	13420	204027	184924	198311	1.97701	1.97701	0	0.00416645	0.00823712	-0.00823712	ATPase, class V, type 10D	molecular_function:magnesium ion binding | molecular_function:phospholipid-translocating ATPase activity | molecular_function:protein binding | molecular_function:ATP binding | cellular_component:nucleus | cellular_component:endoplasmic reticulum | cellular_component:endoplasmic reticulum membrane | cellular_component:plasma membrane | biological_process:cation transport | biological_process:meta…
286410	NM_001010986	ATP11C	82950	82272	75312	189071	192313	183275	1.43129	1.43129	0.042001	0.0142552	0.0204033	-0.0204033	ATPase, class VI, type 11C	molecular_function:cation-transporting ATPase activity | biological_process:cation transport | cellular_component:integral component of membrane | molecular_function:magnesium ion binding | molecular_function:phospholipid-translocating ATPase activity | molecular_function:ATP binding | biological_process:phospholipid transport | molecular_function:nucleotide binding | molecular_function:metal ion…
57130	NM_020410	ATP13A	45582	53206	53381	203892	203061	210430	1.72965	1.72965	0	0.00163875	0.00283445	-0.00283445	ATPase type 13A1	molecular_function:molecular_function | molecular_function:ATP binding | cellular_component:cellular_component | cellular_component:endoplasmic reticulum membrane | biological_process:ATP catabolic process | biological_process:cation transport | cellular_component:integral component of membrane | molecular_function:cation-transporting ATPase activity | molecular_function:metal ion binding | molec…
79572	NM_024524	ATP13A3	123898	122942	173352	234774	226292	236073	1.14538	1.14538	11.095	0.0661997	0.0758237	-0.0758237	ATPase type 13A3	biological_process:ATP catabolic process | biological_process:cation transport | cellular_component:integral component of membrane | molecular_function:ATPase activity | molecular_function:ATP binding | molecular_function:cation-transporting ATPase activity | molecular_function:metal ion binding | molecular_function:nucleotide binding
344905	NM_198505	ATP13A5	27009	31634	30893	222716	228814	217429	2.66217	2.66217	0	0.000262231	0.000698103	-0.000698103	ATPase type 13A5	molecular_function:ATP binding | biological_process:ATP catabolic process | biological_process:cation transport | cellular_component:integral component of membrane | molecular_function:cation-transporting ATPase activity | molecular_function:metal ion binding | molecular_function:nucleotide binding
476	NM_001001586	ATP1A1	26585	28500	30090	66017	64580	60029	2.07087	2.07087	0	0.00147325	0.00305091	-0.00305091	ATPase, Na+/K+ transporting, alpha 1 polypeptide	biological_process:regulation of sodium ion transport | molecular_function:sodium:potassium-exchanging ATPase activity | molecular_function:protein binding | cellular_component:endoplasmic reticulum | cellular_component:Golgi apparatus | cellular_component:plasma membrane | biological_process:ATP biosynthetic process | cellular_component:integral component of membrane | biological_process:ion tra…
477	NM_000702	ATP1A2	89911	82913	99707	248264	242176	249113	1.41222	1.41222	0	0.00226915	0.00320454	-0.00320454	ATPase, Na+/K+ transporting, alpha 2 polypeptide	molecular_function:sodium:potassium-exchanging ATPase activity | cellular_component:cytoplasm | cellular_component:plasma membrane | cellular_component:sodium:potassium-exchanging ATPase complex | biological_process:ATP biosynthetic process | biological_process:potassium ion transport | biological_process:sodium ion transport | biological_process:regulation of striated muscle contraction | biolog…
478	NM_152296	ATP1A3	67879	80007	83469	209152	206616	198519	1.26244	1.26244	0.137128	0.00533469	0.0067347	-0.0067347	ATPase, Na+/K+ transporting, alpha 3 polypeptide	molecular_function:nucleotide binding | molecular_function:metal ion binding | molecular_function:cation-transporting ATPase activity | biological_process:cation transport | cellular_component:integral component of membrane | molecular_function:ATP binding | molecular_function:monovalent inorganic cation transmembrane transporter activity | molecular_function:hydrolase activity, acting on acid an…
480	NM_001001734	ATP1A4	66738	57217	66696	192855	176064	178732	1.0634	1.0634	26.6081	0.115194	0.122497	-0.122497	ATPase, Na+/K+ transporting, alpha 4 polypeptide	molecular_function:sodium:potassium-exchanging ATPase activity | molecular_function:ATP binding | cellular_component:plasma membrane | cellular_component:integral component of plasma membrane | cellular_component:sodium:potassium-exchanging ATPase complex | biological_process:ATP biosynthetic process | biological_process:potassium ion transport | biological_process:sodium ion transport | biologic…
481	NM_001677	ATP1B1	87919	79977	82086	219382	222947	215314	1.54951	1.54951	0.042001	0.02478	0.0383967	-0.0383967	ATPase, Na+/K+ transporting, beta 1 polypeptide	cellular_component:sodium:potassium-exchanging ATPase complex | biological_process:potassium ion transport | biological_process:sodium ion transport | molecular_function:protein binding | cellular_component:plasma membrane | biological_process:cell adhesion | biological_process:blood coagulation | molecular_function:MHC class II protein complex binding | biological_process:ion transmembrane trans…
23439	NM_012069	ATP1B4	76826	67177	65250	210718	209504	208228	1.02775	1.02775	33.6721	0.199497	0.205034	-0.205034	ATPase, Na+/K+ transporting, beta 4 polypeptide	cellular_component:nuclear inner membrane | cellular_component:integral component of plasma membrane | cellular_component:sodium:potassium-exchanging ATPase complex | biological_process:transcription, DNA-templated | biological_process:regulation of transcription, DNA-templated | biological_process:transport | molecular_function:monovalent inorganic cation transmembrane transporter activity | bio…
487	NM_004320	ATP2A1	18237	14778	14778	246743	223977	239771	1.51588	1.51588	0	0.000397147	0.000602026	-0.000602026	ATPase, Ca++ transporting, cardiac muscle, fast twitch 1	molecular_function:nucleotide binding | molecular_function:metal ion binding | molecular_function:calcium-transporting ATPase activity | molecular_function:calcium ion binding | molecular_function:protein binding | molecular_function:ATP binding | cellular_component:endoplasmic reticulum membrane | cellular_component:endoplasmic reticulum-Golgi intermediate compartment | biological_process:ATP ca…
488	NM_001681	ATP2A2	57027	50787	51014	272448	269038	276549	2.80064	2.80064	0	5.63e-06	1.57676e-05	-1.57676e-05	ATPase, Ca++ transporting, cardiac muscle, slow twitch 2	molecular_function:calcium-transporting ATPase activity | molecular_function:protein binding | molecular_function:ATP binding | cellular_component:endoplasmic reticulum membrane | cellular_component:integral component of plasma membrane | biological_process:cellular calcium ion homeostasis | biological_process:cell adhesion | biological_process:blood coagulation | molecular_function:protein C-ter…
489	NM_005173	ATP2A3	105599	90373	97316	253474	235380	254662	1.20541	1.20541	2.9389	0.0336886	0.0406087	-0.0406087	ATPase, Ca++ transporting, ubiquitous	molecular_function:calcium-transporting ATPase activity | molecular_function:ATP binding | cellular_component:endoplasmic reticulum | cellular_component:endoplasmic reticulum membrane | biological_process:calcium ion transport | biological_process:blood coagulation | biological_process:metabolic process | cellular_component:integral component of membrane | cellular_component:sarcoplasmic reticulu…
492	NM_001001344	ATP2B3	54171	57395	57857	222753	220065	221034	1.52213	1.52213	0	0.00191951	0.00292175	-0.00292175	ATPase, Ca++ transporting, plasma membrane 3	molecular_function:calcium-transporting ATPase activity | molecular_function:calmodulin binding | molecular_function:ATP binding | cellular_component:Golgi apparatus | cellular_component:plasma membrane | biological_process:blood coagulation | biological_process:metabolic process | biological_process:cell death | cellular_component:integral component of membrane | biological_process:ion transmemb…
27032	NM_014382	ATP2C1	41464	29730	35051	175327	167761	193776	3.36202	3.36202	0	0.000239129	0.000803956	-0.000803956	ATPase, Ca++ transporting, type 2C, member 1	molecular_function:ATP binding | biological_process:cation transport | biological_process:metabolic process | cellular_component:integral component of membrane | molecular_function:cation-transporting ATPase activity | molecular_function:metal ion binding | cellular_component:Golgi membrane | molecular_function:signal transducer activity | molecular_function:calcium-transporting ATPase activity |…
495	NM_000704	ATP4A	46612	54665	66257	211237	223943	232345	1.966	1.966	0	0.000489047	0.000961468	-0.000961468	ATPase, H+/K+ exchanging, alpha polypeptide	molecular_function:magnesium ion binding | molecular_function:ATP binding | cellular_component:extracellular space | cellular_component:plasma membrane | cellular_component:integral component of plasma membrane | biological_process:ATP biosynthetic process | biological_process:transport | biological_process:potassium ion transport | molecular_function:hydrogen:potassium-exchanging ATPase activity…
496	NM_000705	ATP4B	94816	99557	99659	265024	266804	268641	1.41331	1.41331	0.042001	0.00806922	0.0114043	-0.0114043	ATPase, H+/K+ exchanging, beta polypeptide	cellular_component:plasma membrane | cellular_component:sodium:potassium-exchanging ATPase complex | biological_process:potassium ion transport | biological_process:sodium ion transport | biological_process:cell adhesion | molecular_function:hydrogen:potassium-exchanging ATPase activity | biological_process:ion transmembrane transport | biological_process:hydrogen ion transmembrane transport | bi…
498	NM_004046	ATP5A1	110810	96057	116831	242770	249797	247607	1.27352	1.27352	0.443512	0.0139446	0.0177587	-0.0177587	ATP synthase, H+ transporting, mitochondrial F1 complex, alpha subunit 1, cardiac muscle	biological_process:ATP metabolic process | biological_process:negative regulation of endothelial cell proliferation | molecular_function:protein binding | molecular_function:ATP binding | cellular_component:mitochondrion | cellular_component:mitochondrial inner membrane | cellular_component:mitochondrial proton-transporting ATP synthase complex | cellular_component:mitochondrial matrix | cellular…
509	NM_005174	ATP5C1	21457	15436	21393	296619	275883	291467	1.73239	1.73239	0.137128	0.0464934	0.0805446	-0.0805446	ATP synthase, H+ transporting, mitochondrial F1 complex, gamma polypeptide 1	biological_process:ATP synthesis coupled proton transport | cellular_component:proton-transporting ATP synthase complex, catalytic core F(1) | cellular_component:proton-transporting ATP synthase complex, catalytic core F(1) | cellular_component:proton-transporting ATP synthase complex, catalytic core F(1) | cellular_component:proton-transporting ATP synthase complex, catalytic core F(1) | cellula…
518	NM_001689	ATP5G3	79807	68980	83976	200254	203848	214151	1.89818	1.89818	0	0.00566171	0.010747	-0.010747	ATP synthase, H+ transporting, mitochondrial Fo complex, subunit C3 (subunit 9)	molecular_function:transporter activity | cellular_component:mitochondrial proton-transporting ATP synthase complex | molecular_function:lipid binding | molecular_function:hydrogen ion transmembrane transporter activity | biological_process:ATP synthesis coupled proton transport | biological_process:ATP hydrolysis coupled proton transport | cellular_component:integral component of membrane | cell…
522	NM_001003697	ATP5J	12596	9882	10018	197985	188350	145947	1.91546	1.91546	0	0.00965151	0.0184871	-0.0184871	ATP synthase, H+ transporting, mitochondrial Fo complex, subunit F6	cellular_component:mitochondrial proton-transporting ATP synthase complex, coupling factor F(o) | cellular_component:mitochondrial proton-transporting ATP synthase complex, coupling factor F(o) | cellular_component:mitochondrial proton-transporting ATP synthase complex, coupling factor F(o) | cellular_component:mitochondrial proton-transporting ATP synthase complex, coupling factor F(o) | cellula…
539	NM_001697	ATP5O	48180	65956	130652	236704	243576	247916	1.5827	1.5827	0.137128	0.0395209	0.06255	-0.06255	ATP synthase, H+ transporting, mitochondrial F1 complex, O subunit	molecular_function:proton-transporting ATP synthase activity, rotational mechanism | biological_process:ATP synthesis coupled proton transport | molecular_function:transporter activity | cellular_component:nucleus | cellular_component:mitochondrion | cellular_component:mitochondrial inner membrane | cellular_component:mitochondrial proton-transporting ATP synthase complex | cellular_component:pla…
23545	NM_012463	ATP6V0A2	128983	125739	124289	259072	256759	269112	1.00378	1.00378	37.008	0.2332	0.234081	-0.234081	ATPase, H+ transporting, lysosomal V0 subunit a2	molecular_function:hydrogen ion transmembrane transporter activity | biological_process:ATP hydrolysis coupled proton transport | cellular_component:proton-transporting V-type ATPase, V0 domain | cellular_component:vacuolar proton-transporting V-type ATPase, V0 domain | molecular_function:protein binding | cellular_component:cytoplasm | cellular_component:lysosomal membrane | cellular_component:p…
50617	NM_130840	ATP6V0A4	82323	69316	75613	235562	229159	238886	1.08352	1.08352	21.6065	0.134072	0.145269	-0.145269	ATPase, H+ transporting, lysosomal V0 subunit a4	cellular_component:vacuolar proton-transporting V-type ATPase, V0 domain | biological_process:ossification | molecular_function:protein binding | cellular_component:lysosomal membrane | cellular_component:endosome | cellular_component:plasma membrane | biological_process:cellular iron ion homeostasis | biological_process:regulation of pH | biological_process:excretion | biological_process:sensory…
527	NM_001694	ATP6V0C	46201	55872	57294	214704	211492	200847	1.49946	1.49946	0	0.00530775	0.00795877	-0.00795877	ATPase, H+ transporting, lysosomal 16kDa, V0 subunit c	molecular_function:hydrogen ion transmembrane transporter activity | biological_process:ATP hydrolysis coupled proton transport | cellular_component:integral component of membrane | cellular_component:proton-transporting V-type ATPase, V0 domain | molecular_function:protein binding | cellular_component:lysosomal membrane | biological_process:cellular iron ion homeostasis | biological_process:insu…
9114	NM_004691	ATP6V0D1	57531	55099	62347	136399	167001	146142	1.73783	1.73783	0	0.00148254	0.00257641	-0.00257641	ATPase, H+ transporting, lysosomal 38kDa, V0 subunit d1	biological_process:ATP hydrolysis coupled proton transport | cellular_component:proton-transporting V-type ATPase, V0 domain | molecular_function:protein binding | cellular_component:lysosomal membrane | biological_process:cellular iron ion homeostasis | biological_process:activation of signaling protein activity involved in unfolded protein response | biological_process:insulin receptor signalin…
245972	NM_152565	ATP6V0D2	49353	43607	57464	172527	167506	155124	1.28504	1.28504	1.21626	0.0288568	0.0370821	-0.0370821	ATPase, H+ transporting, lysosomal 38kDa, V0 subunit d2	molecular_function:hydrogen ion transmembrane transporter activity | biological_process:ATP hydrolysis coupled proton transport | cellular_component:proton-transporting V-type ATPase, V0 domain | molecular_function:protein binding | biological_process:cellular iron ion homeostasis | biological_process:insulin receptor signaling pathway | cellular_component:endosome membrane | cellular_component:a…
8992	NM_003945	ATP6V0E	27111	37698	33561	110846	129099	130252	1.27794	1.27794	2.9389	0.0563355	0.0719935	-0.0719935	ATPase, H+ transporting, lysosomal 9kDa, V0 subunit e1	molecular_function:transporter activity | biological_process:cellular iron ion homeostasis | biological_process:vacuolar acidification | biological_process:metabolic process | biological_process:insulin receptor signaling pathway | cellular_component:endosome membrane | biological_process:ATP hydrolysis coupled proton transport | cellular_component:integral component of membrane | biological_proc…
523	NM_001690	ATP6V1A	121909	134758	135794	209083	208426	205281	1.09744	1.09744	16.2507	0.0809925	0.0888846	-0.0888846	ATPase, H+ transporting, lysosomal 70kDa, V1 subunit A	molecular_function:ATP binding | biological_process:ATP hydrolysis coupled proton transport | cellular_component:proton-transporting V-type ATPase, V1 domain | biological_process:ATP metabolic process | molecular_function:proton-transporting ATPase activity, rotational mechanism | cellular_component:lysosomal membrane | cellular_component:cytosol | cellular_component:plasma membrane | cellular_co…
526	NM_001693	ATP6V1B2	93100	99151	129282	244886	259840	251989	1.25236	1.25236	2.9389	0.0498	0.0623677	-0.0623677	ATPase, H+ transporting, lysosomal 56/58kDa, V1 subunit B2	molecular_function:ATP binding | cellular_component:lysosomal membrane | cellular_component:cytosol | cellular_component:plasma membrane | biological_process:cellular iron ion homeostasis | biological_process:insulin receptor signaling pathway | cellular_component:endomembrane system | molecular_function:hydrogen ion transmembrane transporter activity | biological_process:ATP hydrolysis coupled p…
528	NM_001695	ATP6V1C1	23536	23692	33261	118301	136708	126406	1.34585	1.34585	0.137128	0.00890532	0.0119852	-0.0119852	ATPase, H+ transporting, lysosomal 42kDa, V1 subunit C1	biological_process:ATP hydrolysis coupled proton transport | cellular_component:proton-transporting V-type ATPase, V1 domain | molecular_function:hydrogen ion transmembrane transporter activity | molecular_function:protein binding | cellular_component:lysosomal membrane | cellular_component:cytosol | cellular_component:plasma membrane | biological_process:cellular iron ion homeostasis | biologica…
245973	NM_144583	ATP6V1C2	27179	35029	48577	195415	193187	196343	1.24909	1.24909	0.137128	0.000676355	0.000844831	-0.000844831	ATPase, H+ transporting, lysosomal 42kDa, V1 subunit C2	cellular_component:lysosomal membrane | cellular_component:cytosol | biological_process:cellular iron ion homeostasis | biological_process:insulin receptor signaling pathway | biological_process:ATP hydrolysis coupled proton transport | biological_process:positive regulation of Wnt signaling pathway | cellular_component:proton-transporting V-type ATPase, V1 domain | biological_process:transferrin…
51382	NM_015994	ATP6V1D	118854	112937	131816	230554	260780	248126	2.27818	2.27818	0	0.0013028	0.00296801	-0.00296801	ATPase, H+ transporting, lysosomal 34kDa, V1 subunit D	molecular_function:ATPase activity, coupled to transmembrane movement of substances | biological_process:transmembrane transport | molecular_function:protein binding | cellular_component:lysosomal membrane | cellular_component:cytosol | biological_process:cellular iron ion homeostasis | biological_process:insulin receptor signaling pathway | biological_process:proton transport | cellular_componen…
529	NM_001039367	ATP6V1E1	16444	17819	16765	213992	220950	224434	1.48925	1.48925	0.042001	0.0205809	0.0306502	-0.0306502	ATPase, H+ transporting, lysosomal 31kDa, V1 subunit E1	molecular_function:protein binding | cellular_component:lysosomal membrane | cellular_component:endosome | cellular_component:cytosol | biological_process:cellular iron ion homeostasis | biological_process:metabolic process | biological_process:insulin receptor signaling pathway | biological_process:proton transport | cellular_component:apical plasma membrane | cellular_component:proton-transport…
9296	NM_004231	ATP6V1F	85802	77184	76411	218031	209093	209811	2.02769	2.02769	0	0.00214573	0.00435088	-0.00435088	ATPase, H+ transporting, lysosomal 14kDa, V1 subunit F	molecular_function:protein binding | cellular_component:cytosol | biological_process:ATP catabolic process | biological_process:cellular iron ion homeostasis | biological_process:insulin receptor signaling pathway | molecular_function:hydrogen ion transmembrane transporter activity | biological_process:ATP hydrolysis coupled proton transport | cellular_component:proton-transporting two-sector ATP…
9550	NM_004888	ATP6V1G1	122432	98450	94623	231464	238286	217893	1.35804	1.35804	0.00681625	0.00241439	0.00327885	-0.00327885	ATPase, H+ transporting, lysosomal 13kDa, V1 subunit G1	cellular_component:lysosomal membrane | cellular_component:cytosol | cellular_component:plasma membrane | biological_process:cellular iron ion homeostasis | biological_process:insulin receptor signaling pathway | biological_process:proton transport | cellular_component:vacuolar proton-transporting V-type ATPase complex | molecular_function:hydrolase activity, acting on acid anhydrides, catalyzing…
534	NM_130463	ATP6V1G2	161434	141500	141297	265308	275832	262379	1.30706	1.30706	0.00681625	0.000601137	0.000785722	-0.000785722	ATPase, H+ transporting, lysosomal 13kDa, V1 subunit G2	cellular_component:cytosol | biological_process:cellular iron ion homeostasis | biological_process:insulin receptor signaling pathway | biological_process:transferrin transport | cellular_component:melanosome | biological_process:interaction with host | biological_process:transmembrane transport | biological_process:phagosome maturation | molecular_function:hydrolase activity, acting on acid anhy…
51606	NM_213620	ATP6V1H	120022	128865	148276	212751	224296	230790	2.02712	2.02712	0.00681625	0.0230627	0.046751	-0.046751	ATPase, H+ transporting, lysosomal 50/57kDa, V1 subunit H	cellular_component:vacuolar proton-transporting V-type ATPase, V1 domain | biological_process:ATP hydrolysis coupled proton transport | molecular_function:proton-transporting ATPase activity, rotational mechanism | molecular_function:protein binding | cellular_component:lysosomal membrane | cellular_component:cytosol | cellular_component:plasma membrane | biological_process:ATP catabolic process …
538	NM_000052	ATP7A	25632	192434	63144	160804	162022	172554	2.51855	2.51855	0.137128	0.0561111	0.141319	-0.141319	ATPase, Cu++ transporting, alpha polypeptide	biological_process:blood vessel development | biological_process:blood vessel remodeling | biological_process:regulation of oxidative phosphorylation | molecular_function:copper-exporting ATPase activity | molecular_function:copper ion transmembrane transporter activity | molecular_function:copper ion binding | molecular_function:protein binding | molecular_function:ATP binding | cellular_compone…
540	NM_001005918	ATP7B	40096	39704	30946	280677	275519	287442	1.85933	1.85933	0	0.0155016	0.0288227	-0.0288227	ATPase, Cu++ transporting, beta polypeptide	cellular_component:Golgi membrane | molecular_function:copper-exporting ATPase activity | molecular_function:copper ion binding | molecular_function:protein binding | molecular_function:ATP binding | cellular_component:mitochondrion | cellular_component:late endosome | cellular_component:integral component of plasma membrane | biological_process:copper ion transport | biological_process:cellular …
10396	NM_001105529	ATP8A1	46709	40487	38729	233350	257317	246951	3.70143	3.70143	0	0.000674842	0.00249788	-0.00249788	ATPase, aminophospholipid transporter (APLT), class I, type 8A, member 1	molecular_function:magnesium ion binding | molecular_function:phospholipid-translocating ATPase activity | molecular_function:ATP binding | biological_process:cation transport | cellular_component:integral component of membrane | molecular_function:cation-transporting ATPase activity | biological_process:phospholipid translocation | molecular_function:protein binding | cellular_component:endoplas…
51761	NM_016529	ATP8A2	105087	98527	100080	234251	237819	239481	1.63963	1.63963	0	0.000507068	0.000831406	-0.000831406	ATPase, aminophospholipid transporter, class I, type 8A, member 2	molecular_function:magnesium ion binding | cellular_component:photoreceptor outer segment | molecular_function:phospholipid-translocating ATPase activity | molecular_function:ATP binding | cellular_component:endosome | cellular_component:Golgi apparatus | cellular_component:plasma membrane | biological_process:cation transport | biological_process:metabolic process | biological_process:negative r…
5205	NM_005603	ATP8B1	86443	87537	93618	180874	198139	174532	2.26339	2.26339	0	0.00925599	0.0209499	-0.0209499	ATPase, aminophospholipid transporter, class I, type 8B, member 1	molecular_function:magnesium ion binding | molecular_function:phospholipid-translocating ATPase activity | molecular_function:ATP binding | cellular_component:integral component of membrane | biological_process:phospholipid translocation | molecular_function:protein binding | cellular_component:endoplasmic reticulum | cellular_component:Golgi apparatus | cellular_component:plasma membrane | cellu…
57198	NM_001005855	ATP8B2	37806	40144	39681	177549	164496	173902	1.5284	1.5284	0	0.00424506	0.00648816	-0.00648816	ATPase, aminophospholipid transporter, class I, type 8B, member 2	molecular_function:magnesium ion binding | molecular_function:phospholipid-translocating ATPase activity | molecular_function:ATP binding | cellular_component:Golgi apparatus | cellular_component:plasma membrane | biological_process:ATP catabolic process | biological_process:cation transport | cellular_component:integral component of membrane | molecular_function:cation-transporting ATPase activi…
148229	NM_138813	ATP8B3	69468	62340	75909	204917	200351	181864	2.27859	2.27859	0	0.00110355	0.00251455	-0.00251455	ATPase, aminophospholipid transporter, class I, type 8B, member 3	molecular_function:magnesium ion binding | molecular_function:phospholipid-translocating ATPase activity | molecular_function:ATP binding | cellular_component:integral component of membrane | biological_process:phospholipid translocation | cellular_component:acrosomal membrane | cellular_component:endoplasmic reticulum | biological_process:ATP catabolic process | biological_process:cation transpo…
93974	NM_016311	ATPIF1	253570	239818	243378	229981	233619	235894	1.10508	1.10508	6.35904	0.000921125	0.00101792	-0.00101792	ATPase inhibitory factor 1	biological_process:angiogenesis | biological_process:negative regulation of endothelial cell proliferation | molecular_function:enzyme inhibitor activity | molecular_function:calmodulin binding | cellular_component:mitochondrion | biological_process:generation of precursor metabolites and energy | biological_process:heme biosynthetic process | cellular_component:cell surface | biological_process:…
545	NM_001184	ATR	64103	66147	56832	220341	202413	190922	1.04893	1.04893	33.6721	0.202384	0.212287	-0.212287	ATR serine/threonine kinase	biological_process:metabolic process | molecular_function:phosphotransferase activity, alcohol group as acceptor | molecular_function:transferase activity, transferring phosphorus-containing groups | biological_process:DNA damage checkpoint | molecular_function:DNA binding | molecular_function:protein kinase activity | molecular_function:protein serine/threonine kinase activity | molecular_functi…
8455	NM_139322	ATRN	87032	75869	74587	282153	273811	272331	1.18002	1.18002	2.9389	0.0126598	0.0149389	-0.0149389	attractin	cellular_component:extracellular space | cellular_component:plasma membrane | cellular_component:integral component of plasma membrane | biological_process:inflammatory response | molecular_function:carbohydrate binding | cellular_component:extracellular vesicular exosome | molecular_function:protein binding | molecular_function:receptor activity | biological_process:multicellular organismal deve…
26033	NM_207303	ATRNL1	167333	133185	151676	260543	262273	259187	1.13327	1.13327	11.095	0.0572342	0.0648616	-0.0648616	attractin-like 1	molecular_function:protein binding | molecular_function:receptor activity | biological_process:multicellular organismal development | cellular_component:integral component of membrane | molecular_function:carbohydrate binding | biological_process:G-protein coupled receptor signaling pathway
546	NM_138270	ATRX	110491	122880	166894	215942	221957	222141	1.14951	1.14951	6.35904	0.0253551	0.0291459	-0.0291459	alpha thalassemia/mental retardation syndrome X-linked	molecular_function:DNA binding | molecular_function:DNA helicase activity | molecular_function:protein binding | molecular_function:ATP binding | cellular_component:nucleus | cellular_component:nuclear heterochromatin | cellular_component:nucleolus | cellular_component:cytoplasm | cellular_component:mitochondrion | biological_process:ATP catabolic process | biological_process:DNA repair | biologi…
549	NM_001698	AUH	49866	48048	51170	153979	152512	153171	1.87367	1.87367	0	0.000365438	0.00068471	-0.00068471	AU RNA binding protein/enoyl-CoA hydratase	molecular_function:mRNA 3'-UTR binding | molecular_function:enoyl-CoA hydratase activity | molecular_function:methylglutaconyl-CoA hydratase activity | cellular_component:mitochondrion | cellular_component:mitochondrial matrix | biological_process:leucine catabolic process | biological_process:branched-chain amino acid catabolic process | biological_process:cellular nitrogen compound metabolic pr…
6790	NM_198437	AURKA	109855	79275	72278	201462	192559	197137	1.01912	1.01912	36.0237	0.209107	0.213106	-0.213106	aurora kinase A	molecular_function:protein kinase activity | molecular_function:ATP binding | biological_process:protein phosphorylation | molecular_function:protein serine/threonine kinase activity | biological_process:G2/M transition of mitotic cell cycle | molecular_function:protein serine/threonine/tyrosine kinase activity | molecular_function:protein binding | cellular_component:nucleus | cellular_component…
60370	NM_021732	AVPI1	120375	111777	113777	196383	209657	212453	1.09386	1.09386	16.2507	0.0273449	0.0299114	-0.0299114	arginine vasopressin-induced 1	biological_process:cell cycle | biological_process:activation of MAPK activity
552	NM_000706	AVPR1A	19539	22635	26236	206668	207776	203087	1.29756	1.29756	0.443512	0.0119916	0.0155598	-0.0155598	arginine vasopressin receptor 1A	molecular_function:vasopressin receptor activity | molecular_function:protein kinase C binding | molecular_function:protein binding | cellular_component:endosome | cellular_component:plasma membrane | cellular_component:integral component of plasma membrane | biological_process:generation of precursor metabolites and energy | biological_process:G-protein coupled receptor signaling pathway | biolo…
554	NM_000054	AVPR2	121774	104063	118808	275516	273898	267311	3.14031	3.14031	0	9.72e-05	0.000305238	-0.000305238	arginine vasopressin receptor 2	molecular_function:vasopressin receptor activity | molecular_function:protein binding | cellular_component:endosome | cellular_component:endoplasmic reticulum | cellular_component:Golgi apparatus | cellular_component:plasma membrane | cellular_component:integral component of plasma membrane | biological_process:water transport | biological_process:adenylate cyclase-modulating G-protein coupled re…
84153	NM_032193	AYP1	85876	79408	111564	215979	227426	225955	1.3133	1.3133	0.137128	0.00984985	0.0129358	-0.0129358	ribonuclease H2, subunit C	cellular_component:nucleus | biological_process:RNA catabolic process | cellular_component:ribonuclease H2 complex
563	NM_001185	AZGP1	57751	65251	52163	227802	227754	226392	1.05513	1.05513	26.6081	0.106763	0.112649	-0.112649	alpha-2-glycoprotein 1, zinc-binding	biological_process:detection of chemical stimulus involved in sensory perception of bitter taste | biological_process:retina homeostasis | biological_process:positive regulation of T cell mediated cytotoxicity | molecular_function:glycoprotein binding | biological_process:antigen processing and presentation of peptide antigen via MHC class I | molecular_function:ribonuclease activity | cellular_c…
566	NM_001700	AZU1	54025	42243	55722	194672	220678	205892	2.94637	2.94637	0	0.000292389	0.000861487	-0.000861487	azurocidin 1	biological_process:microglial cell activation | cellular_component:extracellular region | biological_process:proteolysis | biological_process:inflammatory response | biological_process:protein kinase C-activating G-protein coupled receptor signaling pathway | molecular_function:heparin binding | biological_process:glial cell migration | molecular_function:toxic substance binding | biological_proc…
8708	NM_020981	B3GALT1	21375	15037	16764	251560	257773	238644	1.2361	1.2361	0.443512	0.00239586	0.00296152	-0.00296152	UDP-Gal:betaGlcNAc beta 1,3-galactosyltransferase, polypeptide 1	cellular_component:Golgi membrane | biological_process:protein glycosylation | molecular_function:UDP-galactose:beta-N-acetylglucosamine beta-1,3-galactosyltransferase activity | cellular_component:integral component of membrane | biological_process:oligosaccharide biosynthetic process
8706	NM_033168	B3GALT3	42300	49186	52630	181201	181217	190471	1.19107	1.19107	1.21626	0.00470616	0.00560537	-0.00560537	beta-1,3-N-acetylgalactosaminyltransferase 1 (globoside blood group)	biological_process:protein glycosylation | cellular_component:membrane | cellular_component:Golgi membrane | cellular_component:integral component of membrane | molecular_function:galactosylgalactosylglucosylceramide beta-D-acetylgalactosaminyltransferase activity | molecular_function:galactosyltransferase activity | molecular_function:transferase activity, transferring glycosyl groups | biologic…
8705	NM_003782	B3GALT4	47259	35828	51671	183325	169939	168272	1.24487	1.24487	6.35904	0.0648833	0.0807715	-0.0807715	UDP-Gal:betaGlcNAc beta 1,3-galactosyltransferase, polypeptide 4	cellular_component:Golgi membrane | biological_process:protein glycosylation | molecular_function:UDP-galactose:beta-N-acetylglucosamine beta-1,3-galactosyltransferase activity | cellular_component:integral component of membrane | molecular_function:ganglioside galactosyltransferase activity
10317	NM_006057	B3GALT5	43287	47128	43933	156314	162261	146937	1.35031	1.35031	2.9389	0.0865248	0.116836	-0.116836	UDP-Gal:betaGlcNAc beta 1,3-galactosyltransferase, polypeptide 5	cellular_component:Golgi membrane | cellular_component:endoplasmic reticulum | cellular_component:Golgi apparatus | biological_process:protein glycosylation | molecular_function:UDP-galactose:beta-N-acetylglucosamine beta-1,3-galactosyltransferase activity | cellular_component:integral component of membrane
126792	NM_080605	B3GALT6	77751	72636	100782	234184	227486	230090	2.14458	2.14458	0	0.000168907	0.000362234	-0.000362234	UDP-Gal:betaGal beta 1,3-galactosyltransferase polypeptide 6	cellular_component:Golgi membrane | cellular_component:Golgi medial cisterna | biological_process:carbohydrate metabolic process | biological_process:glycosaminoglycan biosynthetic process | biological_process:protein glycosylation | biological_process:heparan sulfate proteoglycan biosynthetic process | cellular_component:integral component of membrane | biological_process:glycosaminoglycan metab…
374907	NM_198540	B3GALT7	51393	50958	59999	197670	187784	171136	2.23138	2.23138	0	0.000385329	0.000859816	-0.000859816	UDP-GlcNAc:betaGal beta-1,3-N-acetylglucosaminyltransferase 8	cellular_component:Golgi membrane | molecular_function:galactosyltransferase activity | cellular_component:integral component of membrane | molecular_function:protein N-acetylglucosaminyltransferase activity | biological_process:O-glycan processing | biological_process:poly-N-acetyllactosamine biosynthetic process | biological_process:post-translational protein modification | biological_process:c…
27087	NM_018644	B3GAT1	22770	25888	36992	124134	108705	99845	1.71626	1.71626	0	0.000778724	0.00133649	-0.00133649	beta-1,3-glucuronyltransferase 1	biological_process:metabolic process | molecular_function:galactosylgalactosylxylosylprotein 3-beta-glucuronosyltransferase activity | cellular_component:membrane | cellular_component:Golgi membrane | biological_process:carbohydrate metabolic process | biological_process:protein glycosylation | cellular_component:integral component of membrane | biological_process:glycosaminoglycan metabolic proc…
135152	NM_080742	B3GAT2	57083	62677	69139	239144	286958	261548	1.02459	1.02459	33.6721	0.190761	0.195452	-0.195452	beta-1,3-glucuronyltransferase 2	cellular_component:Golgi membrane | biological_process:carbohydrate metabolic process | biological_process:protein glycosylation | molecular_function:galactosylgalactosylxylosylprotein 3-beta-glucuronosyltransferase activity | cellular_component:integral component of membrane | biological_process:glycosaminoglycan metabolic process | biological_process:chondroitin sulfate metabolic process | biol…
10331	NM_014256	B3GNT3	80232	69981	82863	209108	240292	232504	1.56643	1.56643	0	0.00259712	0.00406821	-0.00406821	UDP-GlcNAc:betaGal beta-1,3-N-acetylglucosaminyltransferase 3	biological_process:protein glycosylation | molecular_function:galactosyltransferase activity | cellular_component:membrane | cellular_component:Golgi apparatus | cellular_component:integral component of membrane | cellular_component:Golgi membrane | cellular_component:integral component of plasma membrane | biological_process:carbohydrate metabolic process | biological_process:O-glycan processing…
79369	NM_030765	B3GNT4	98227	87165	86466	207763	202127	192610	2.43152	2.43152	0	0.00082568	0.00200765	-0.00200765	UDP-GlcNAc:betaGal beta-1,3-N-acetylglucosaminyltransferase 4	cellular_component:Golgi membrane | biological_process:carbohydrate metabolic process | molecular_function:galactosyltransferase activity | cellular_component:integral component of membrane | biological_process:O-glycan processing | biological_process:keratan sulfate biosynthetic process | biological_process:glycosaminoglycan metabolic process | biological_process:keratan sulfate metabolic proces…
84002	NM_032047	B3GNT5	55667	59114	105403	204973	195825	219585	1.6845	1.6845	0	4.49e-05	7.5634e-05	-7.5634e-05	UDP-GlcNAc:betaGal beta-1,3-N-acetylglucosaminyltransferase 5	biological_process:protein glycosylation | molecular_function:galactosyltransferase activity | cellular_component:membrane | cellular_component:Golgi membrane | cellular_component:intracellular | biological_process:central nervous system development | molecular_function:beta-galactosyl-N-acetylglucosaminylgalactosylglucosyl-ceramide beta-1,3-acetylglucosaminyltransferase activity | biological_pro…
11041	NM_006876	B3GNT6	16000	11495	14181	231041	239774	242404	1.07776	1.07776	26.6081	0.163669	0.176396	-0.176396	UDP-GlcNAc:betaGal beta-1,3-N-acetylglucosaminyltransferase 1	cellular_component:Golgi membrane | biological_process:carbohydrate metabolic process | biological_process:protein glycosylation | molecular_function:N-acetyllactosaminide beta-1,3-N-acetylglucosaminyltransferase activity | biological_process:keratan sulfate biosynthetic process | cellular_component:integral component of Golgi membrane | biological_process:glycosaminoglycan metabolic process | bi…
93010	NM_145236	B3GNT7	32526	34187	32711	266038	258319	242962	3.05712	3.05712	0	0.00624538	0.0190929	-0.0190929	UDP-GlcNAc:betaGal beta-1,3-N-acetylglucosaminyltransferase 7	cellular_component:Golgi membrane | biological_process:carbohydrate metabolic process | molecular_function:galactosyltransferase activity | cellular_component:integral component of membrane | biological_process:O-glycan processing | biological_process:keratan sulfate biosynthetic process | biological_process:glycosaminoglycan metabolic process | biological_process:keratan sulfate metabolic proces…
283358	NM_173593	B4GALNAC-T3	15397	18376	15372	244742	248435	257782	1.37659	1.37659	0.137128	0.0150954	0.0207802	-0.0207802	beta-1,4-N-acetyl-galactosaminyl transferase 3	biological_process:metabolic process | molecular_function:acetylgalactosaminyltransferase activity | cellular_component:integral component of membrane | cellular_component:Golgi cisterna membrane | molecular_function:N-acetyl-beta-glucosaminyl-glycoprotein 4-beta-N-acetylgalactosaminyltransferase activity | molecular_function:transferase activity, transferring hexosyl groups
2683	NM_001497	B4GALT1	88045	82946	98569	222480	208796	206268	2.46672	2.46672	0	0.000345589	0.000852472	-0.000852472	UDP-Gal:betaGlcNAc beta 1,4- galactosyltransferase, polypeptide 1	cellular_component:Golgi trans cisterna | cellular_component:Golgi membrane | molecular_function:beta-N-acetylglucosaminylglycopeptide beta-1,4-galactosyltransferase activity | molecular_function:N-acetyllactosamine synthase activity | molecular_function:lactose synthase activity | cellular_component:extracellular space | cellular_component:Golgi apparatus | cellular_component:plasma membrane | b…
8702	NM_003778	B4GALT4	165006	141206	154195	253056	243916	244208	1.32129	1.32129	11.095	0.137591	0.181798	-0.181798	UDP-Gal:betaGlcNAc beta 1,4- galactosyltransferase, polypeptide 4	biological_process:carbohydrate metabolic process | molecular_function:transferase activity, transferring glycosyl groups | cellular_component:Golgi membrane | molecular_function:N-acetyllactosamine synthase activity | biological_process:membrane lipid metabolic process | molecular_function:galactosyltransferase activity | cellular_component:integral component of membrane | biological_process:ker…
9331	NM_004775	B4GALT6	42165	216115	41801	197182	189500	205140	1.13252	1.13252	16.2507	0.125967	0.14266	-0.14266	UDP-Gal:betaGlcNAc beta 1,4- galactosyltransferase, polypeptide 6	biological_process:carbohydrate metabolic process | molecular_function:transferase activity, transferring glycosyl groups | cellular_component:Golgi membrane | molecular_function:galactosyltransferase activity | cellular_component:integral component of membrane | biological_process:keratan sulfate biosynthetic process | biological_process:protein N-linked glycosylation via asparagine | biological…
10233	NM_006992	B7	71658	66728	63208	177396	164190	174821	1.48762	1.48762	0.00681625	0.00891637	0.0132641	-0.0132641	leucine rich repeat containing 23	molecular_function:protein binding | cellular_component:cellular_component | biological_process:biological_process
83744	NM_001007101	BA526D8.4	84952	81328	78417	144930	144040	156789	1.08272	1.08272	21.6065	0.0792911	0.0858496	-0.0858496	zinc finger protein 484	molecular_function:DNA binding | molecular_function:sequence-specific DNA binding transcription factor activity | cellular_component:nucleus | biological_process:transcription, DNA-templated | biological_process:regulation of transcription, DNA-templated | molecular_function:metal ion binding | molecular_function:nucleic acid binding | cellular_component:intracellular
570	NM_001701	BAAT	15571	16214	10808	229076	196164	221232	1.47171	1.47171	0.137128	0.0226031	0.0332651	-0.0332651	bile acid CoA:amino acid N-acyltransferase	biological_process:bile acid conjugation | molecular_function:receptor binding | cellular_component:peroxisome | cellular_component:peroxisomal matrix | cellular_component:cytosol | biological_process:glycine metabolic process | biological_process:fatty acid metabolic process | biological_process:acyl-CoA metabolic process | biological_process:bile acid biosynthetic process | biological_process:b…
23621	NM_138973	BACE1	63882	54263	42765	222058	212352	219957	3.43402	3.43402	0	0.000176002	0.000604395	-0.000604395	beta-site APP-cleaving enzyme 1	molecular_function:aspartic-type endopeptidase activity | biological_process:proteolysis | molecular_function:beta-amyloid binding | molecular_function:protein binding | cellular_component:endosome | cellular_component:late endosome | cellular_component:multivesicular body | cellular_component:endoplasmic reticulum | cellular_component:Golgi apparatus | cellular_component:trans-Golgi network | ce…
25825	NM_138992	BACE2	30693	24834	21981	194571	193691	199642	1.39912	1.39912	0.042001	0.00790657	0.0110623	-0.0110623	beta-site APP-cleaving enzyme 2	molecular_function:aspartic-type endopeptidase activity | cellular_component:endosome | cellular_component:endoplasmic reticulum | cellular_component:Golgi apparatus | biological_process:proteolysis | biological_process:membrane protein ectodomain proteolysis | cellular_component:cell surface | cellular_component:integral component of membrane | biological_process:peptide hormone processing | bio…
11332	NM_181866	BACH	31580	32054	45361	153369	133093	123353	1.78591	1.78591	0	0.00131537	0.00234913	-0.00234913	acyl-CoA thioesterase 7	molecular_function:fatty-acyl-CoA binding | molecular_function:protein binding | cellular_component:nucleus | cellular_component:cytoplasm | cellular_component:mitochondrion | cellular_component:cytosol | biological_process:coenzyme A biosynthetic process | molecular_function:palmitoyl-CoA hydrolase activity | molecular_function:long-chain fatty acyl-CoA binding | biological_process:medium-chain …
571	NM_001011545	BACH1	152968	158151	161183	196036	210311	213600	1.38592	1.38592	0.137128	0.0167794	0.023255	-0.023255	BTB and CNC homology 1, basic leucine zipper transcription factor 1	biological_process:regulation of transcription involved in G1/S transition of mitotic cell cycle | biological_process:regulation of transcription involved in G2/M transition of mitotic cell cycle | biological_process:negative regulation of transcription from RNA polymerase II promoter | molecular_function:RNA polymerase II core promoter proximal region sequence-specific DNA binding transcription …
60468	NM_021813	BACH2	57915	58460	71899	229617	235282	226276	1.10567	1.10567	16.2507	0.105156	0.116269	-0.116269	BTB and CNC homology 1, basic leucine zipper transcription factor 2	cellular_component:nucleus | cellular_component:cytoplasm | biological_process:transcription, DNA-templated | molecular_function:sequence-specific DNA binding | molecular_function:protein binding | molecular_function:sequence-specific DNA binding transcription factor activity | biological_process:regulation of transcription, DNA-templated | biological_process:negative regulation of transcription …
86	NM_177989	BAF53A	26596	27932	31673	202640	207767	199208	1.95752	1.95752	0	0.000434912	0.00085135	-0.00085135	actin-like 6A	cellular_component:nuclear chromatin | biological_process:neural retina development | molecular_function:chromatin binding | molecular_function:transcription coactivator activity | molecular_function:protein binding | cellular_component:nucleus | cellular_component:nucleoplasm | cellular_component:plasma membrane | biological_process:DNA repair | biological_process:DNA recombination | biological_…
9532	NM_004282	BAG2	57262	57669	60848	210441	229707	219358	1.18765	1.18765	6.35904	0.0396266	0.0470626	-0.0470626	BCL2-associated athanogene 2	molecular_function:protein binding | biological_process:protein folding | biological_process:protein metabolic process | molecular_function:chaperone binding
9529	NM_001015048	BAG5	30791	26361	23503	308039	314775	305847	1.19814	1.19814	11.095	0.108785	0.13034	-0.13034	BCL2-associated athanogene 5	cellular_component:nucleus | biological_process:protein folding | cellular_component:membrane | cellular_component:inclusion body | biological_process:negative regulation of protein ubiquitination | molecular_function:ubiquitin protein ligase binding | cellular_component:perinuclear region of cytoplasm | molecular_function:chaperone binding | biological_process:negative regulation of ubiquitin-pr…
574	NM_001187	BAGE	274759	258429	263161	305352	292892	294881	1.17945	1.17945	2.9389	0.0244303	0.0288143	-0.0288143	B melanoma antigen family, member 2	cellular_component:extracellular region
85316	NM_182484	BAGE5	48854	53132	58609	290719	292450	276149	1.20603	1.20603	0.443512	0.00102053	0.00123079	-0.00123079	B melanoma antigen family, member 2	cellular_component:extracellular region
22893	NM_014952	BAHD1	21367	23685	20923	230628	229875	253787	1.4081	1.4081	0.042001	0.0133641	0.018818	-0.018818	bromo adjacent homology domain containing 1	molecular_function:chromatin binding | molecular_function:protein binding | cellular_component:chromatin silencing complex | cellular_component:chromosome | biological_process:transcription, DNA-templated | biological_process:heterochromatin assembly | biological_process:negative regulation of transcription, DNA-templated
575	NM_001702	BAI1	26013	30696	25488	200949	211750	203249	2.16125	2.16125	0	2.18e-05	4.71153e-05	-4.71153e-05	brain-specific angiogenesis inhibitor 1	molecular_function:G-protein coupled receptor activity | cellular_component:plasma membrane | cellular_component:integral component of plasma membrane | cellular_component:cell-cell junction | biological_process:cell adhesion | biological_process:signal transduction | biological_process:G-protein coupled receptor signaling pathway | biological_process:neuropeptide signaling pathway | biological_p…
576	NM_001703	BAI2	41320	43813	41471	201945	205364	195949	1.99629	1.99629	0	3.52e-05	7.02693e-05	-7.02693e-05	brain-specific angiogenesis inhibitor 2	molecular_function:G-protein coupled receptor activity | cellular_component:plasma membrane | biological_process:neuropeptide signaling pathway | cellular_component:integral component of membrane | biological_process:negative regulation of angiogenesis | biological_process:G-protein coupled receptor signaling pathway | molecular_function:transmembrane signaling receptor activity | biological_proc…
577	NM_001704	BAI3	36290	37389	38567	220968	230015	229933	1.50845	1.50845	0	0.00226908	0.0034228	-0.0034228	brain-specific angiogenesis inhibitor 3	molecular_function:G-protein coupled receptor activity | biological_process:G-protein coupled receptor signaling pathway | cellular_component:integral component of membrane | biological_process:negative regulation of angiogenesis | cellular_component:plasma membrane | biological_process:neuropeptide signaling pathway | molecular_function:transmembrane signaling receptor activity | biological_proc…
10458	NM_006340	BAIAP2	139340	151934	148530	211917	237642	232386	1.17334	1.17334	11.095	0.0715866	0.0839952	-0.0839952	BAI1-associated protein 2	biological_process:signal transduction | molecular_function:cytoskeletal adaptor activity | molecular_function:SH3 domain binding | biological_process:regulation of actin cytoskeleton organization | biological_process:filopodium assembly | cellular_component:ruffle | molecular_function:protein binding | cellular_component:cytoplasm | cellular_component:cytosol | cellular_component:plasma membrane…
8938	NM_003933	BAIAP3	130172	166130	119249	210898	187457	199988	1.01039	1.01039	37.008	0.217281	0.219538	-0.219538	BAI1-associated protein 3	biological_process:G-protein coupled receptor signaling pathway | biological_process:neurotransmitter secretion | molecular_function:protein C-terminus binding | molecular_function:protein binding
578	NM_001188	BAK1	21014	18616	16315	194935	182467	178197	1.72018	1.72018	0	0.00523355	0.00900267	-0.00900267	BCL2-antagonist/killer 1	biological_process:release of cytochrome c from mitochondria | molecular_function:protein binding | cellular_component:mitochondrion | cellular_component:mitochondrial outer membrane | biological_process:apoptotic process | biological_process:intrinsic apoptotic signaling pathway in response to DNA damage | biological_process:establishment or maintenance of transmembrane electrochemical gradient …
83666	NM_031458	BAL	123741	111640	106834	236779	224777	232516	1.44649	1.44649	0	0.00263493	0.00381141	-0.00381141	poly (ADP-ribose) polymerase family, member 9	molecular_function:NAD+ ADP-ribosyltransferase activity | molecular_function:NAD+ ADP-ribosyltransferase activity | molecular_function:NAD+ ADP-ribosyltransferase activity | molecular_function:NAD+ ADP-ribosyltransferase activity | molecular_function:NAD+ ADP-ribosyltransferase activity | molecular_function:NAD+ ADP-ribosyltransferase activity | molecular_function:NAD+ ADP-ribosyltransferase acti…
55024	NM_001083907	BANK1	144573	131198	102564	231560	229387	239654	1.02571	1.02571	30.6466	0.10244	0.105073	-0.105073	B-cell scaffold protein with ankyrin repeats 1	biological_process:B cell activation | molecular_function:protein binding
8314	NM_004656	BAP1	64648	60354	61797	248119	238271	263907	2.63491	2.63491	0	0.000196684	0.000518244	-0.000518244	BRCA1 associated protein-1 (ubiquitin carboxy-terminal hydrolase)	molecular_function:ubiquitin-specific protease activity | cellular_component:intracellular | biological_process:ubiquitin-dependent protein catabolic process | biological_process:regulation of cell growth | molecular_function:chromatin binding | molecular_function:ubiquitin thiolesterase activity | molecular_function:protein binding | cellular_component:nucleus | cellular_component:cytoplasm | bi…
579	NM_001189	BAPX1	15954	15949	15156	308085	291683	314205	1.0869	1.0869	16.2507	0.071673	0.0779011	-0.0779011	NK3 homeobox 2	biological_process:skeletal system development | molecular_function:sequence-specific DNA binding transcription factor activity | cellular_component:nucleus | biological_process:regulation of transcription, DNA-templated | biological_process:transcription from RNA polymerase II promoter | biological_process:negative regulation of chondrocyte differentiation | biological_process:negative regulatio…
580	NM_000465	BARD1	30318	26168	23109	169516	154347	175252	2.15818	2.15818	0	0.00271976	0.00586974	-0.00586974	BRCA1 associated RING domain 1	cellular_component:ubiquitin ligase complex | biological_process:tissue homeostasis | molecular_function:RNA binding | molecular_function:ubiquitin-protein transferase activity | molecular_function:protein binding | cellular_component:nucleus | cellular_component:nucleolus | cellular_component:cytoplasm | biological_process:DNA repair | biological_process:cellular response to DNA damage stimulus …
343472	NM_020063	BARHL2	124722	104754	107542	223932	209096	222413	1.00953	1.00953	37.008	0.213699	0.215735	-0.215735	BarH-like homeobox 2	cellular_component:nucleus | cellular_component:cytoplasm | biological_process:transcription, DNA-templated | molecular_function:sequence-specific DNA binding | biological_process:positive regulation of transcription from RNA polymerase II promoter | biological_process:cell fate commitment | biological_process:cell fate determination | biological_process:neuron migration | biological_process:neur…
56033	NM_021570	BARX1	89791	102484	103815	170758	182427	171305	2.37935	2.37935	0	0.000341217	0.000811876	-0.000811876	BARX homeobox 1	molecular_function:transcription regulatory region sequence-specific DNA binding | molecular_function:sequence-specific DNA binding transcription factor activity | cellular_component:nucleus | biological_process:transcription, DNA-templated | biological_process:regulation of transcription, DNA-templated | biological_process:tissue development | biological_process:anterior/posterior pattern specif…
8538	NM_003658	BARX2	115399	132260	173304	266653	271542	260567	1.54667	1.54667	0.00681625	0.0147431	0.0228028	-0.0228028	BARX homeobox 2	molecular_function:transcription regulatory region sequence-specific DNA binding | cellular_component:nucleus | molecular_function:RNA polymerase II regulatory region sequence-specific DNA binding | molecular_function:RNA polymerase II transcription regulatory region sequence-specific DNA binding transcription factor activity involved in positive regulation of transcription | cellular_component:m…
10409	NM_006317	BASP1	140148	113777	111809	203573	196587	212759	1.35633	1.35633	0.137128	0.0173475	0.0235289	-0.0235289	brain abundant, membrane attached signal protein 1	molecular_function:transcription corepressor activity | molecular_function:protein binding | cellular_component:nucleus | cellular_component:cytoplasm | cellular_component:cytoskeleton | cellular_component:plasma membrane | biological_process:thorax and anterior abdomen determination | biological_process:gonad development | cellular_component:nuclear speck | molecular_function:protein domain spec…
7919	NM_004640	BAT1	31032	35354	48441	213327	203426	210582	1.42227	1.42227	0.042001	0.00938004	0.0133409	-0.0133409	DEAD (Asp-Glu-Ala-Asp) box polypeptide 39B	molecular_function:nucleic acid binding | molecular_function:ATP binding | molecular_function:helicase activity | biological_process:metabolic process | molecular_function:DNA binding | molecular_function:hydrolase activity | biological_process:spliceosomal complex assembly | cellular_component:transcription export complex | biological_process:mRNA splicing, via spliceosome | molecular_function:A…
7916	NM_080686	BAT2	115262	113974	95318	262307	270381	266278	1.22653	1.22653	1.21626	0.0153958	0.0188834	-0.0188834	proline-rich coiled-coil 2A	molecular_function:protein binding | cellular_component:nucleus | cellular_component:cytoplasm | cellular_component:membrane | molecular_function:poly(A) RNA binding | molecular_function:poly(A) RNA binding | molecular_function:poly(A) RNA binding | molecular_function:poly(A) RNA binding | molecular_function:poly(A) RNA binding | molecular_function:poly(A) RNA binding | molecular_function:poly(A)…
23215	NM_015172	BAT2D1	186447	187471	150961	251980	251044	253055	1.26276	1.26276	0.443512	0.00856286	0.0108128	-0.0108128	proline-rich coiled-coil 2C	molecular_function:protein C-terminus binding | cellular_component:membrane | molecular_function:poly(A) RNA binding | molecular_function:poly(A) RNA binding | molecular_function:poly(A) RNA binding | biological_process:hematopoietic progenitor cell differentiation | molecular_function:poly(A) RNA binding | molecular_function:poly(A) RNA binding | molecular_function:poly(A) RNA binding
7917	NM_001098534	BAT3	163896	150128	122115	224043	217474	216406	1.31169	1.31169	0.042001	0.00329736	0.00432511	-0.00432511	BCL2-associated athanogene 6	biological_process:kidney development | biological_process:immune system process | molecular_function:protein binding | cellular_component:nucleus | cellular_component:cytosol | biological_process:ubiquitin-dependent protein catabolic process | biological_process:transport | biological_process:synaptonemal complex assembly | biological_process:spermatogenesis | biological_process:brain developmen…
7918	NM_033177	BAT4	247384	230236	208653	273939	263448	277015	1.82408	1.82408	0	2.18e-05	3.97649e-05	-3.97649e-05	G patch domain and ankyrin repeats 1	molecular_function:nucleic acid binding | molecular_function:protein binding
10538	NM_006399	BATF	136127	112101	152014	258281	251733	254216	1.88564	1.88564	0	0.00390249	0.00735869	-0.00735869	basic leucine zipper transcription factor, ATF-like	biological_process:cytokine production | biological_process:lymphoid progenitor cell differentiation | molecular_function:sequence-specific DNA binding transcription factor activity | molecular_function:protein binding | cellular_component:nucleus | cellular_component:cytoplasm | biological_process:transcription, DNA-templated | biological_process:regulation of transcription, DNA-templated | biol…
581	NM_138763	BAX	73002	74963	77283	199851	189241	191818	1.39244	1.39244	0	0.000294182	0.000409631	-0.000409631	BCL2-associated X protein	biological_process:B cell apoptotic process | biological_process:release of cytochrome c from mitochondria | molecular_function:protein binding | cellular_component:nucleus | cellular_component:mitochondrion | cellular_component:mitochondrial outer membrane | cellular_component:mitochondrial permeability transition pore complex | cellular_component:endoplasmic reticulum | cellular_component:endop…
11177	NM_013448	BAZ1A	43101	57012	53069	247857	232009	202728	1.48685	1.48685	0.042001	0.0179792	0.0267322	-0.0267322	bromodomain adjacent to zinc finger domain, 1A	molecular_function:protein binding | biological_process:DNA-dependent DNA replication | biological_process:chromatin remodeling | biological_process:transcription, DNA-templated | biological_process:regulation of transcription, DNA-templated | molecular_function:zinc ion binding | cellular_component:CHRAC | cellular_component:ACF complex | cellular_component:nuclear chromosome
9031	NM_032408	BAZ1B	9754	8725	9476	136784	140327	133069	1.41383	1.41383	0.137128	0.0252487	0.0356975	-0.0356975	bromodomain adjacent to zinc finger domain, 1B	biological_process:heart morphogenesis | molecular_function:chromatin binding | molecular_function:protein tyrosine kinase activity | molecular_function:non-membrane spanning protein tyrosine kinase activity | molecular_function:protein binding | molecular_function:ATP binding | biological_process:double-strand break repair | biological_process:transcription, DNA-templated | biological_process:re…
27113	NM_014417	BBC3	156061	134452	141927	227120	237564	244536	1.22134	1.22134	0.443512	0.00634029	0.00774364	-0.00774364	BCL2 binding component 3	cellular_component:mitochondrion | biological_process:apoptotic process | biological_process:release of cytochrome c from mitochondria | molecular_function:protein binding | cellular_component:mitochondrial outer membrane | cellular_component:cytosol | biological_process:activation of cysteine-type endopeptidase activity involved in apoptotic process | biological_process:cellular response to DNA …
8424	NM_003986	BBOX1	58513	263977	126909	216961	217170	237710	2.77017	2.77017	0	0.0293098	0.0811933	-0.0811933	butyrobetaine (gamma), 2-oxoglutarate dioxygenase (gamma-butyrobetaine hydroxylase) 1	molecular_function:iron ion binding | cellular_component:cytosol | molecular_function:zinc ion binding | molecular_function:gamma-butyrobetaine dioxygenase activity | biological_process:cellular nitrogen compound metabolic process | biological_process:small molecule metabolic process | biological_process:carnitine biosynthetic process | biological_process:oxidation-reduction process | cellular_co…
582	NM_024649	BBS1	245256	252867	248106	319211	302748	302092	1.06867	1.06867	26.6081	0.119019	0.127192	-0.127192	Bardet-Biedl syndrome 1	cellular_component:BBSome | biological_process:nonmotile primary cilium assembly | molecular_function:RNA polymerase II repressing transcription factor binding | biological_process:retina homeostasis | molecular_function:patched binding | molecular_function:smoothened binding | molecular_function:protein binding | cellular_component:cytoplasm | cellular_component:microtubule organizing center | b…
583	NM_031885	BBS2	53007	47799	57901	202306	210823	215002	1.23747	1.23747	2.9389	0.0358128	0.0443173	-0.0443173	Bardet-Biedl syndrome 2	biological_process:nonmotile primary cilium assembly | cellular_component:BBSome | molecular_function:protein binding | molecular_function:RNA polymerase II repressing transcription factor binding | cellular_component:cytoplasm | biological_process:sperm axoneme assembly | biological_process:visual perception | biological_process:protein localization | biological_process:striatum development | bi…
56987	NM_020235	BBX	37839	46242	51351	229095	228122	233293	1.22708	1.22708	2.9389	0.0482738	0.0592358	-0.0592358	bobby sox homolog (Drosophila)	cellular_component:nucleus | cellular_component:cytoplasm | molecular_function:DNA binding | biological_process:transcription, DNA-templated | biological_process:regulation of transcription, DNA-templated | biological_process:bone development
91289	NM_033200	BC002942	62796	59779	57463	245586	228555	221039	1.07313	1.07313	26.6081	0.174135	0.186869	-0.186869	lipase maturation factor 2	cellular_component:endoplasmic reticulum membrane | cellular_component:integral component of membrane
55973	NM_001008406	BCAP29	29731	27277	34512	173496	176983	182850	1.35105	1.35105	0.443512	0.02442	0.0329926	-0.0329926	B-cell receptor-associated protein 29	cellular_component:endoplasmic reticulum | biological_process:intracellular protein transport | cellular_component:integral component of membrane | biological_process:osteoblast differentiation | cellular_component:endoplasmic reticulum membrane | biological_process:apoptotic process | biological_process:vesicle-mediated transport | biological_process:ER to Golgi vesicle-mediated transport | biol…
8537	NM_003657	BCAS1	260662	249722	234955	276432	275576	292237	1.1451	1.1451	2.9389	0.000548883	0.000628528	-0.000628528	breast carcinoma amplified sequence 1	cellular_component:cytoplasm
10286	NM_005872	BCAS2	93703	85545	121878	228811	235244	237306	1.71203	1.71203	0	0.00081887	0.00140193	-0.00140193	breast carcinoma amplified sequence 2	biological_process:RNA splicing, via transesterification reactions | molecular_function:protein binding | cellular_component:nucleus | cellular_component:spliceosomal complex | cellular_component:nucleolus | biological_process:mRNA processing | cellular_component:cell junction
587	NM_001190	BCAT2	11244	13014	8445	231125	202702	212393	1.12984	1.12984	21.6065	0.139173	0.157243	-0.157243	branched chain amino-acid transaminase 2, mitochondrial	molecular_function:branched-chain-amino-acid transaminase activity | cellular_component:mitochondrion | cellular_component:mitochondrial matrix | biological_process:branched-chain amino acid biosynthetic process | biological_process:branched-chain amino acid catabolic process | biological_process:cellular nitrogen compound metabolic process | biological_process:small molecule metabolic process | …
83875	NM_001037290	BCDO2	87189	87853	139919	240711	252566	258048	2.22733	2.22733	0	0.000811773	0.00180809	-0.00180809	beta-carotene oxygenase 2	cellular_component:intracellular | cellular_component:mitochondrion | biological_process:carotenoid metabolic process | biological_process:carotene metabolic process | biological_process:carotene catabolic process | molecular_function:oxidoreductase activity, acting on single donors with incorporation of molecular oxygen, incorporation of two atoms of oxygen | biological_process:retinoic acid met…
590	NM_000055	BCHE	108567	99510	117513	223251	249808	250988	2.10187	2.10187	0	0.0131168	0.0275697	-0.0275697	butyrylcholinesterase	molecular_function:beta-amyloid binding | molecular_function:catalytic activity | molecular_function:acetylcholinesterase activity | cellular_component:extracellular region | cellular_component:extracellular space | cellular_component:endoplasmic reticulum lumen | biological_process:synaptic transmission, cholinergic | biological_process:choline metabolic process | molecular_function:enzyme bindi…
593	NM_000709	BCKDHA	11486	12225	8808	156235	153703	147237	1.31128	1.31128	0.443512	0.019694	0.0258243	-0.0258243	branched chain keto acid dehydrogenase E1, alpha polypeptide	molecular_function:alpha-ketoacid dehydrogenase activity | molecular_function:3-methyl-2-oxobutanoate dehydrogenase (2-methylpropanoyl-transferring) activity | molecular_function:3-methyl-2-oxobutanoate dehydrogenase (2-methylpropanoyl-transferring) activity | molecular_function:3-methyl-2-oxobutanoate dehydrogenase (2-methylpropanoyl-transferring) activity | molecular_function:3-methyl-2-oxobuta…
594	NM_000056	BCKDHB	33380	35789	46670	189433	185550	196494	1.38229	1.38229	0.137128	0.0189002	0.0261257	-0.0261257	branched chain keto acid dehydrogenase E1, beta polypeptide	molecular_function:3-methyl-2-oxobutanoate dehydrogenase (2-methylpropanoyl-transferring) activity | molecular_function:3-methyl-2-oxobutanoate dehydrogenase (2-methylpropanoyl-transferring) activity | molecular_function:3-methyl-2-oxobutanoate dehydrogenase (2-methylpropanoyl-transferring) activity | molecular_function:3-methyl-2-oxobutanoate dehydrogenase (2-methylpropanoyl-transferring) activi…
8915	NM_003921	BCL10	130943	115637	149252	225053	231028	242581	1.02511	1.02511	33.6721	0.206693	0.211884	-0.211884	B-cell CLL/lymphoma 10	biological_process:neural tube closure | molecular_function:protease binding | biological_process:toll-like receptor signaling pathway | biological_process:response to molecule of bacterial origin | biological_process:adaptive immune response | biological_process:negative regulation of mature B cell apoptotic process | molecular_function:transcription coactivator activity | molecular_function:pro…
53335	NM_138559	BCL11A	21212	21140	19461	272813	246998	229027	1.47401	1.47401	0.00681625	0.00918878	0.0135443	-0.0135443	B-cell CLL/lymphoma 11A (zinc finger protein)	biological_process:negative regulation of transcription from RNA polymerase II promoter | molecular_function:RNA polymerase II core promoter proximal region sequence-specific DNA binding | molecular_function:RNA polymerase II core promoter proximal region sequence-specific DNA binding transcription factor activity involved in negative regulation of transcription | cellular_component:nucleus | cel…
64919	NM_022898	BCL11B	50073	53225	55778	234808	230080	234986	1.34524	1.34524	0.042001	0.00315116	0.00423907	-0.00423907	B-cell CLL/lymphoma 11B (zinc finger protein)	molecular_function:protein binding | cellular_component:nucleus | biological_process:transcription, DNA-templated | biological_process:positive regulation of transcription from RNA polymerase II promoter | molecular_function:metal ion binding | cellular_component:intracellular | molecular_function:sequence-specific DNA binding | biological_process:skin development | biological_process:odontogenes…
596	NM_000657	BCL2	140874	123836	156237	221465	237442	238201	2.67942	2.67942	0	0.000321368	0.00086108	-0.00086108	B-cell CLL/lymphoma 2	biological_process:protein polyubiquitination | biological_process:release of cytochrome c from mitochondria | molecular_function:protease binding | molecular_function:protein binding | cellular_component:nucleus | cellular_component:cytoplasm | cellular_component:mitochondrion | cellular_component:mitochondrial outer membrane | cellular_component:endoplasmic reticulum | cellular_component:endopl…
10018	NM_207002	BCL2L11	69450	75885	83341	223713	230559	225174	1.43443	1.43443	0	0.000650766	0.00093348	-0.00093348	BCL2-like 11 (apoptosis facilitator)	molecular_function:protein binding | cellular_component:mitochondrial outer membrane | cellular_component:cytosol | biological_process:apoptotic process | biological_process:activation of cysteine-type endopeptidase activity involved in apoptotic process | biological_process:intrinsic apoptotic signaling pathway in response to DNA damage | cellular_component:endomembrane system | biological_proce…
83596	NM_001040668	BCL2L12	41140	46204	35140	190247	182694	157636	1.6072	1.6072	0	0.000557344	0.000895765	-0.000895765	BCL2-like 12 (proline rich)	molecular_function:protein binding | cellular_component:nucleus | cellular_component:membrane | biological_process:positive regulation of transcription from RNA polymerase II promoter | biological_process:inhibition of cysteine-type endopeptidase activity involved in apoptotic process | molecular_function:p53 binding | biological_process:negative regulation of intrinsic apoptotic signaling pathwa…
23786	NM_015367	BCL2L13	18645	20881	22025	223993	232303	237311	1.51978	1.51978	0	0.000116946	0.000177732	-0.000177732	BCL2-like 13 (apoptosis facilitator)	cellular_component:nucleus | cellular_component:mitochondrion | biological_process:apoptotic process | biological_process:activation of cysteine-type endopeptidase activity involved in apoptotic process | molecular_function:cysteine-type endopeptidase activator activity involved in apoptotic process | cellular_component:integral component of membrane | cellular_component:mitochondrial membrane | …
79370	NM_030766	BCL2L14	92306	83026	82806	211126	191539	206248	1.95029	1.95029	0	0.000997152	0.00194474	-0.00194474	BCL2-like 14 (apoptosis facilitator)	molecular_function:protein binding | cellular_component:cytoplasm | cellular_component:cytosol | biological_process:apoptotic process | cellular_component:endomembrane system | molecular_function:protein kinase binding | biological_process:regulation of apoptotic process | cellular_component:intracellular organelle | biological_process:positive regulation of extrinsic apoptotic signaling pathway
602	NM_005178	BCL3	64816	65913	77932	116306	130617	124966	1.6354	1.6354	0	0.00296336	0.00484629	-0.00484629	B-cell CLL/lymphoma 3	biological_process:protein import into nucleus, translocation | molecular_function:protein binding | cellular_component:cytoplasm | biological_process:transcription, DNA-templated | biological_process:cellular response to DNA damage stimulus | biological_process:I-kappaB kinase/NF-kappaB signaling | molecular_function:transcription factor binding | biological_process:response to virus | biologica…
604	NM_001706	BCL6	113269	89917	101352	208644	202361	185127	1.57589	1.57589	0.00681625	0.0122083	0.0192389	-0.0192389	B-cell CLL/lymphoma 6	biological_process:protein import into nucleus, translocation | biological_process:negative regulation of transcription from RNA polymerase II promoter | biological_process:regulation of germinal center formation | biological_process:negative regulation of B cell apoptotic process | molecular_function:chromatin binding | molecular_function:sequence-specific DNA binding transcription factor activi…
255877	NM_181844	BCL6B	11766	14459	14466	243418	251348	250887	1.33989	1.33989	0.443512	0.0253995	0.0340324	-0.0340324	B-cell CLL/lymphoma 6, member B	cellular_component:nucleus | molecular_function:metal ion binding | molecular_function:protein binding | molecular_function:DNA binding | biological_process:negative regulation of transcription from RNA polymerase II promoter | molecular_function:nucleic acid binding
199786	NM_001098524	BCNP1	78597	70869	59450	157645	144358	146347	1.91721	1.91721	0	0.00101922	0.00195407	-0.00195407	family with sequence similarity 129, member C
23174	NM_015144	BDG29	219796	216620	192048	267146	252851	243954	1.18465	1.18465	2.9389	0.0326814	0.038716	-0.038716	zinc finger, CCHC domain containing 14	molecular_function:nucleic acid binding | molecular_function:zinc ion binding | molecular_function:phosphatidylinositol binding
622	NM_203315	BDH	19620	24305	26502	255778	236322	250720	1.34231	1.34231	0.042001	0.00675476	0.00906697	-0.00906697	3-hydroxybutyrate dehydrogenase, type 1	molecular_function:oxidoreductase activity | biological_process:oxidation-reduction process | cellular_component:nucleus | cellular_component:mitochondrion | molecular_function:3-hydroxybutyrate dehydrogenase activity | cellular_component:mitochondrial matrix | biological_process:cellular lipid metabolic process | biological_process:small molecule metabolic process | biological_process:cellular k…
623	NM_000710	BDKRB1	42635	46074	44144	271693	277532	268785	1.54449	1.54449	0	6.78e-05	0.000104717	-0.000104717	bradykinin receptor B1	molecular_function:protein binding | cellular_component:endoplasmic reticulum | cellular_component:plasma membrane | cellular_component:integral component of plasma membrane | biological_process:positive regulation of cytosolic calcium ion concentration | biological_process:response to mechanical stimulus | molecular_function:G-protein coupled receptor activity | biological_process:G-protein coup…
624	NM_000623	BDKRB2	33116	38144	33484	204925	205785	211897	2.33862	2.33862	0	0.000546824	0.00127881	-0.00127881	bradykinin receptor B2	molecular_function:protease binding | molecular_function:phosphatidylinositol phospholipase C activity | molecular_function:bradykinin receptor activity | molecular_function:protein binding | cellular_component:endosome | cellular_component:plasma membrane | cellular_component:integral component of plasma membrane | biological_process:smooth muscle contraction | biological_process:inflammatory re…
627	NM_001709	BDNF	51135	43835	52502	158619	145616	184069	1.7481	1.7481	0	0.00226726	0.00396338	-0.00396338	brain-derived neurotrophic factor	cellular_component:extracellular region | cellular_component:cytoplasm | biological_process:nervous system development | molecular_function:growth factor activity | cellular_component:perinuclear region of cytoplasm | biological_process:positive regulation of synapse assembly | molecular_function:receptor binding | biological_process:feeding behavior | molecular_function:protein binding | biologi…
55814	NM_018429	BDP1	56325	44593	38367	208861	240234	206768	4.19014	4.19014	0	0.00023619	0.000989669	-0.000989669	B double prime 1, subunit of RNA polymerase III transcription initiation factor IIIB	molecular_function:DNA binding | molecular_function:chromatin binding | cellular_component:nucleus | cellular_component:nucleoplasm | cellular_component:cytoplasm | biological_process:regulation of transcription, DNA-templated | biological_process:transcription from RNA polymerase III promoter | biological_process:gene expression
51272	NM_001098787	BET1L	136099	132376	112518	246222	258971	243822	1.04136	1.04136	30.6466	0.168601	0.175574	-0.175574	Bet1 golgi vesicular membrane trafficking protein-like	molecular_function:protein binding | molecular_function:SNAP receptor activity | cellular_component:endosome | cellular_component:Golgi apparatus | biological_process:protein transport | cellular_component:membrane | cellular_component:SNARE complex | biological_process:retrograde transport, endosome to Golgi | cellular_component:Golgi membrane | cellular_component:Golgi stack | cellular_componen…
55859	NM_018476	BEX1	81274	64790	54732	260630	255509	256021	1.00884	1.00884	37.008	0.225273	0.227264	-0.227264	brain expressed, X-linked 1	molecular_function:RNA polymerase II activating transcription factor binding | cellular_component:nucleus | cellular_component:transcription factor complex | cellular_component:cytoplasm | biological_process:nervous system development | biological_process:cell differentiation | biological_process:positive regulation of transcription from RNA polymerase II promoter | biological_process:positive re…
8419	NM_003571	BFSP2	114368	96500	92733	219567	215179	217954	1.05999	1.05999	26.6081	0.166637	0.176633	-0.176633	beaded filament structural protein 2, phakinin	molecular_function:structural constituent of cytoskeleton | cellular_component:cytoplasm | cellular_component:intermediate filament | cellular_component:plasma membrane | biological_process:visual perception | biological_process:response to stimulus | molecular_function:structural molecule activity | molecular_function:protein binding | biological_process:cytoskeleton organization | molecular_fun…
23205	NM_015162	BG1	144594	100257	109924	272082	278456	281311	1.28914	1.28914	1.21626	0.0470889	0.0607044	-0.0607044	acyl-CoA synthetase bubblegum family member 1	molecular_function:catalytic activity | biological_process:metabolic process | biological_process:very long-chain fatty acid metabolic process | molecular_function:long-chain fatty acid-CoA ligase activity | molecular_function:ATP binding | cellular_component:cytoplasm | cellular_component:endoplasmic reticulum | cellular_component:cytoplasmic membrane-bounded vesicle | molecular_function:very lo…
81616	NM_030924	BGR	54891	47164	90552	181627	178065	197409	1.81094	1.81094	0	0.00796085	0.0144167	-0.0144167	acyl-CoA synthetase bubblegum family member 2	molecular_function:catalytic activity | biological_process:metabolic process | biological_process:long-chain fatty acid metabolic process | molecular_function:long-chain fatty acid-CoA ligase activity | molecular_function:ATP binding | cellular_component:cytoplasm | cellular_component:mitochondrion | biological_process:multicellular organismal development | biological_process:spermatogenesis | ce…
201163	NM_144606	BHD	181259	175030	177328	247955	238876	243676	1.02456	1.02456	33.6721	0.0888998	0.0910834	-0.0910834	folliculin	biological_process:negative regulation of transcription from RNA polymerase II promoter | biological_process:in utero embryonic development | biological_process:regulation of protein phosphorylation | biological_process:positive regulation of protein phosphorylation | molecular_function:protein binding | cellular_component:nucleus | cellular_component:cytoplasm | cellular_component:plasma membran…
635	NM_001713	BHMT	90318	87059	109095	267961	256621	280326	1.36181	1.36181	0.042001	0.00872754	0.0118853	-0.0118853	betaine--homocysteine S-methyltransferase	biological_process:sulfur amino acid metabolic process | cellular_component:cytoplasm | cellular_component:cytosol | biological_process:protein methylation | biological_process:amino-acid betaine metabolic process | biological_process:amino-acid betaine catabolic process | molecular_function:zinc ion binding | molecular_function:S-adenosylmethionine-homocysteine S-methyltransferase activity | bio…
23743	NM_017614	BHMT2	42771	54878	60418	189917	176632	168581	1.04652	1.04652	30.6466	0.166262	0.173996	-0.173996	betaine--homocysteine S-methyltransferase 2	molecular_function:S-adenosylmethionine-homocysteine S-methyltransferase activity | biological_process:methylation | cellular_component:cytoplasm | molecular_function:zinc ion binding | biological_process:S-methylmethionine metabolic process | biological_process:S-adenosylmethionine metabolic process | molecular_function:S-methylmethionine-homocysteine S-methyltransferase activity | cellular_comp…
80114	NM_001080512	BICC1	53261	54862	62141	215144	210941	219440	1.37639	1.37639	0	0.000308765	0.00042498	-0.00042498	BicC family RNA binding protein 1	cellular_component:cytoplasm | biological_process:multicellular organismal development | molecular_function:poly(A) RNA binding | molecular_function:poly(A) RNA binding | molecular_function:poly(A) RNA binding | molecular_function:poly(A) RNA binding | molecular_function:poly(A) RNA binding | molecular_function:poly(A) RNA binding | molecular_function:poly(A) RNA binding | biological_process:nega…
638	NM_001197	BIK	91273	57614	60804	250287	248526	249538	1.04038	1.04038	30.6466	0.180861	0.188164	-0.188164	BCL2-interacting killer (apoptosis-inducing)	molecular_function:protein binding | biological_process:apoptotic process | cellular_component:endomembrane system | cellular_component:integral component of membrane | cellular_component:mitochondrial membrane | biological_process:positive regulation of protein homooligomerization | biological_process:positive regulation of release of cytochrome c from mitochondria | biological_process:male gona…
274	NM_004305	BIN1	98852	128918	96343	175501	165842	171841	1.077	1.077	21.6065	0.0914294	0.0984693	-0.0984693	bridging integrator 1	molecular_function:protein binding | cellular_component:nucleus | cellular_component:cytoplasm | biological_process:endocytosis | biological_process:cell proliferation | cellular_component:actin cytoskeleton | biological_process:viral process | cellular_component:Z disc | cellular_component:T-tubule | cellular_component:axon | cellular_component:I band | cellular_component:node of Ranvier | molec…
55909	NM_018688	BIN3	176435	184321	164453	286689	288318	295797	1.03638	1.03638	30.6466	0.040228	0.0416913	-0.0416913	bridging integrator 3	biological_process:cytokinesis | biological_process:barrier septum assembly | molecular_function:protein binding | cellular_component:cytoplasm | cellular_component:cytoskeleton | biological_process:actin filament organization | molecular_function:cytoskeletal adaptor activity | biological_process:protein localization | biological_process:unidimensional cell growth | biological_process:skeletal m…
4671	NM_022892	BIRC1	53732	53851	63796	200532	202335	200370	1.37941	1.37941	0.00681625	0.00429495	0.0059245	-0.0059245	NLR family, apoptosis inhibitory protein	molecular_function:protein binding | molecular_function:ATP binding | cellular_component:cytoplasm | biological_process:inflammatory response | biological_process:nervous system development | biological_process:metabolic process | cellular_component:basolateral plasma membrane | molecular_function:nucleoside-triphosphatase activity | molecular_function:cysteine-type endopeptidase inhibitor activi…
330	NM_001165	BIRC3	17829	22796	15753	196399	194840	221228	1.62035	1.62035	0.042001	0.0237038	0.0384084	-0.0384084	baculoviral IAP repeat containing 3	biological_process:toll-like receptor signaling pathway | biological_process:MyD88-independent toll-like receptor signaling pathway | molecular_function:ubiquitin-protein transferase activity | molecular_function:protein binding | cellular_component:nucleus | cellular_component:cytoplasm | cellular_component:cytosol | biological_process:apoptotic process | biological_process:cell surface receptor…
331	NM_001167	BIRC4	16015	16032	9828	213734	204145	207537	1.74757	1.74757	0	0.000265486	0.000463954	-0.000463954	X-linked inhibitor of apoptosis	molecular_function:ubiquitin-protein transferase activity | molecular_function:protein binding | cellular_component:nucleus | cellular_component:cytoplasm | cellular_component:cytosol | biological_process:apoptotic process | biological_process:cellular response to DNA damage stimulus | molecular_function:zinc ion binding | biological_process:Wnt signaling pathway | biological_process:protein ubiq…
332	NM_001012270	BIRC5	25802	34594	43673	194451	195610	184141	1.24679	1.24679	6.35904	0.0810758	0.101085	-0.101085	baculoviral IAP repeat containing 5	molecular_function:protein binding | biological_process:microtubule cytoskeleton organization | biological_process:negative regulation of neuron apoptotic process | biological_process:regulation of mitotic cell cycle | biological_process:regulation of insulin secretion involved in cellular response to glucose stimulus | biological_process:regulation of type B pancreatic cell proliferation | biolo…
57448	NM_016252	BIRC6	40268	34276	35986	264653	268239	283132	1.56712	1.56712	0	0.00020303	0.000318172	-0.000318172	baculoviral IAP repeat containing 6	cellular_component:spindle pole | molecular_function:ubiquitin-protein transferase activity | molecular_function:cysteine-type endopeptidase inhibitor activity | molecular_function:protein binding | cellular_component:endosome | cellular_component:trans-Golgi network | cellular_component:microtubule organizing center | biological_process:protein phosphorylation | biological_process:apoptotic proc…
112401	NM_033341	BIRC8	12233	12683	9853	205830	184728	196668	1.57613	1.57613	0	0.00353049	0.00556453	-0.00556453	baculoviral IAP repeat containing 8	cellular_component:cytoplasm | biological_process:apoptotic process | molecular_function:zinc ion binding | molecular_function:protein binding | biological_process:negative regulation of apoptotic process | biological_process:neuron apoptotic process | biological_process:negative regulation of cysteine-type endopeptidase activity involved in apoptotic process | biological_process:inhibition of cy…
80321	NM_024491	BITE	58577	58673	53807	133500	131986	137964	1.66981	1.66981	0	0.000151218	0.000252505	-0.000252505	centrosomal protein 70kDa	biological_process:G2/M transition of mitotic cell cycle | molecular_function:protein binding | cellular_component:nucleus | cellular_component:cytoplasm | cellular_component:centrosome | cellular_component:cytosol | cellular_component:nuclear membrane
54841	NM_017693	BIVM	47755	54658	72807	248997	251059	221777	1.35783	1.35783	1.21626	0.0494343	0.0671234	-0.0671234	basic, immunoglobulin-like variable motif containing	cellular_component:extracellular space | cellular_component:nucleus | cellular_component:cytoplasm
641	NM_000057	BLM	12259	15822	18148	316328	312106	321105	1.18545	1.18545	11.095	0.111317	0.131961	-0.131961	Bloom syndrome, RecQ helicase-like	biological_process:regulation of cyclin-dependent protein serine/threonine kinase activity | biological_process:mitotic G2 phase | cellular_component:nuclear chromosome | molecular_function:bubble DNA binding | biological_process:double-strand break repair via homologous recombination | biological_process:DNA double-strand break processing | biological_process:DNA strand renaturation | cellular_c…
642	NM_000386	BLMH	31353	35835	38135	233007	214653	226024	2.12574	2.12574	0	0.000763988	0.00162404	-0.00162404	bleomycin hydrolase	molecular_function:cysteine-type endopeptidase activity | biological_process:proteolysis | biological_process:protein polyubiquitination | biological_process:antigen processing and presentation of peptide antigen via MHC class I | molecular_function:aminopeptidase activity | molecular_function:carboxypeptidase activity | molecular_function:protein binding | cellular_component:nucleus | cellular_c…
282991	NM_001001342	BLOC1S2	204624	191618	159149	261605	258597	269597	1.13392	1.13392	6.35904	0.00371372	0.00421106	-0.00421106	biogenesis of lysosomal organelles complex-1, subunit 2	cellular_component:gamma-tubulin complex | molecular_function:protein binding | cellular_component:nucleus | cellular_component:mitochondrion | cellular_component:centrosome | biological_process:microtubule nucleation | molecular_function:protein C-terminus binding | biological_process:anterograde axon cargo transport | biological_process:positive regulation of cell proliferation | biological_pro…
80213	NM_025141	BLP2	65257	65848	65704	216502	217567	217610	1.28246	1.28246	0.137128	0.00814082	0.0104403	-0.0104403	TM2 domain containing 3	cellular_component:integral component of membrane
643	NM_001716	BLR1	45807	42866	45988	274542	275858	260192	1.58023	1.58023	0	0.00016352	0.000258399	-0.000258399	chemokine (C-X-C motif) receptor 5	molecular_function:G-protein coupled receptor activity | molecular_function:protein binding | cellular_component:plasma membrane | cellular_component:integral component of plasma membrane | biological_process:cellular component movement | biological_process:chemotaxis | biological_process:immune response | biological_process:G-protein coupled receptor signaling pathway | molecular_function:C-X-C …
644	NM_000712	BLVRA	45347	46734	90098	198471	195615	205647	1.42683	1.42683	0	0.000898432	0.00128191	-0.00128191	biliverdin reductase A	molecular_function:oxidoreductase activity | biological_process:oxidation-reduction process | molecular_function:biliverdin reductase activity | cellular_component:cytosol | biological_process:porphyrin-containing compound metabolic process | molecular_function:zinc ion binding | biological_process:heme catabolic process | biological_process:small molecule metabolic process | cellular_component:e…
645	NM_000713	BLVRB	58914	56965	70073	180737	199162	193011	1.4105	1.4105	0	0.0024799	0.00349789	-0.00349789	biliverdin reductase B (flavin reductase (NADPH))	molecular_function:catalytic activity | molecular_function:coenzyme binding | molecular_function:3-beta-hydroxy-delta5-steroid dehydrogenase activity | molecular_function:oxidoreductase activity, acting on the CH-OH group of donors, NAD or NADP as acceptor | biological_process:steroid biosynthetic process | biological_process:oxidation-reduction process | molecular_function:biliverdin reductase a…
8548	NM_003666	BLZF1	37685	41529	46139	225170	231364	216832	1.08495	1.08495	21.6065	0.0706243	0.0766235	-0.0766235	basic leucine zipper nuclear factor 1	cellular_component:nucleus | biological_process:Golgi organization | biological_process:Golgi to plasma membrane protein transport | cellular_component:Golgi membrane | biological_process:mitotic cell cycle | biological_process:regulation of cell growth | molecular_function:DNA binding | molecular_function:sequence-specific DNA binding transcription factor activity | cellular_component:cytoplasm …
51286	NM_016564	BM88	74985	56543	61581	155667	157618	151149	1.42404	1.42404	0.00681625	0.00536985	0.00764691	-0.00764691	cell cycle exit and neuronal differentiation 1	cellular_component:integral component of membrane | biological_process:adult walking behavior | biological_process:cerebellar Purkinje cell differentiation | biological_process:radial glia guided migration of cerebellar granule cell | biological_process:negative regulation of cerebellar granule cell precursor proliferation | biological_process:cerebellar granular layer maturation
90427	NM_001003943	BMF	85495	68817	65573	227125	232806	234287	1.21801	1.21801	1.21626	0.0151282	0.0184262	-0.0184262	Bcl2 modifying factor	biological_process:apoptotic process | molecular_function:protein binding | cellular_component:mitochondrial outer membrane | cellular_component:cytosol | cellular_component:plasma membrane | cellular_component:myosin complex | biological_process:positive regulation of protein homooligomerization | biological_process:anoikis | biological_process:positive regulation of release of cytochrome c from…
648	NM_005180	BMI1	13425	12842	17005	206700	206756	209845	1.22514	1.22514	6.35904	0.0768981	0.094211	-0.094211	BMI1 proto-oncogene, polycomb ring finger	molecular_function:zinc ion binding | biological_process:negative regulation of transcription from RNA polymerase II promoter | cellular_component:ubiquitin ligase complex | molecular_function:protein binding | cellular_component:nucleus | cellular_component:nucleoplasm | cellular_component:cytoplasm | biological_process:transcription, DNA-templated | biological_process:segment specification | bi…
649	NM_001199	BMP1	16225	14859	14677	195007	165578	187258	1.06876	1.06876	21.6065	0.105927	0.113211	-0.113211	bone morphogenetic protein 1	biological_process:skeletal system development | biological_process:cartilage condensation | biological_process:ossification | molecular_function:metalloendopeptidase activity | molecular_function:cytokine activity | molecular_function:calcium ion binding | cellular_component:extracellular region | cellular_component:proteinaceous extracellular matrix | cellular_component:Golgi apparatus | biolog…
9210	NM_005448	BMP15	40630	48594	74866	208065	210476	208056	1.55237	1.55237	0	0.00208301	0.0032336	-0.0032336	bone morphogenetic protein 15	biological_process:ovarian follicle development | molecular_function:cytokine activity | cellular_component:extracellular space | biological_process:female gamete generation | molecular_function:growth factor activity | biological_process:granulosa cell development | cellular_component:cytoplasm | biological_process:positive regulation of transcription, DNA-templated
653	NM_021073	BMP5	33825	33810	39922	174879	188889	195741	1.0734	1.0734	21.6065	0.106053	0.113837	-0.113837	bone morphogenetic protein 5	biological_process:skeletal system development | biological_process:ossification | biological_process:type B pancreatic cell development | molecular_function:cytokine activity | cellular_component:cellular_component | cellular_component:extracellular space | molecular_function:growth factor activity | biological_process:negative regulation of cell proliferation | biological_process:negative regul…
654	NM_001718	BMP6	127520	95819	91642	262120	257533	267049	1.31366	1.31366	1.21626	0.0395097	0.0519023	-0.0519023	bone morphogenetic protein 6	biological_process:skeletal system development | biological_process:type B pancreatic cell development | molecular_function:cytokine activity | biological_process:immune response | biological_process:positive regulation of pathway-restricted SMAD protein phosphorylation | biological_process:positive regulation of bone mineralization | biological_process:BMP signaling pathway | biological_process:…
655	NM_001719	BMP7	37634	34708	34429	172860	177029	168496	1.04097	1.04097	33.6721	0.20464	0.213023	-0.213023	bone morphogenetic protein 7	biological_process:skeletal system development | biological_process:ossification | biological_process:metanephros development | biological_process:ureteric bud development | biological_process:mesonephros development | biological_process:epithelial to mesenchymal transition | molecular_function:cytokine activity | molecular_function:protein binding | cellular_component:extracellular region | cell…
656	NM_001720	BMP8B	51657	46821	58096	206974	170797	171263	1.96555	1.96555	0	0.00917882	0.0180414	-0.0180414	bone morphogenetic protein 8b	biological_process:skeletal system development | biological_process:ossification | molecular_function:cytokine activity | cellular_component:extracellular space | molecular_function:growth factor activity | biological_process:cell differentiation | biological_process:cartilage development
168667	NM_133468	BMPER	156603	146129	135409	219701	206554	211488	1.36745	1.36745	0.00681625	0.00232313	0.00317676	-0.00317676	BMP binding endothelial regulator	biological_process:blood vessel endothelial cell proliferation involved in sprouting angiogenesis | cellular_component:extracellular space | biological_process:regulation of endothelial cell migration | biological_process:negative regulation of BMP signaling pathway | biological_process:endothelial cell activation | biological_process:regulation of pathway-restricted SMAD protein phosphorylation …
9790	NM_014753	BMS1L	152182	157459	160629	169984	170471	181162	1.14193	1.14193	11.095	0.0438314	0.0500524	-0.0500524	BMS1 ribosome biogenesis factor	molecular_function:ATP binding | cellular_component:nucleus | cellular_component:nucleolus | biological_process:ribosome assembly | molecular_function:poly(A) RNA binding | molecular_function:poly(A) RNA binding | molecular_function:poly(A) RNA binding | molecular_function:poly(A) RNA binding | molecular_function:poly(A) RNA binding | molecular_function:poly(A) RNA binding | molecular_function:po…
84993	NM_032907	BMSC-UBP	68114	71291	71651	216266	207801	231229	1.03429	1.03429	33.6721	0.185407	0.191763	-0.191763	ubiquitin-like 7	molecular_function:protein binding
662	NM_013978	BNIP1	58842	52840	54037	167567	160787	163700	1.68337	1.68337	0.00681625	0.0195408	0.0328943	-0.0328943	BCL2/adenovirus E1B 19kDa interacting protein 1	molecular_function:SNAP receptor activity | molecular_function:protein binding | cellular_component:nuclear envelope | cellular_component:cytoplasm | cellular_component:mitochondrion | cellular_component:endoplasmic reticulum | biological_process:autophagy | biological_process:apoptotic process | biological_process:endoplasmic reticulum organization | biological_process:vesicle-mediated transport…
665	NM_004331	BNIP3L	55285	63288	72470	268881	258005	270039	1.17041	1.17041	11.095	0.069241	0.0810401	-0.0810401	BCL2/adenovirus E1B 19kDa interacting protein 3-like	cellular_component:mitochondrial envelope | cellular_component:integral component of membrane | biological_process:positive regulation of apoptotic process | molecular_function:protein binding | molecular_function:lamin binding | cellular_component:nuclear envelope | cellular_component:mitochondrion | cellular_component:mitochondrial outer membrane | cellular_component:endoplasmic reticulum | bio…
149428	NM_138278	BNIPL	124706	102523	109283	210585	217287	217982	1.08232	1.08232	16.2507	0.0449723	0.0486743	-0.0486743	BCL2/adenovirus E1B 19kD interacting protein like	molecular_function:protein binding | cellular_component:nucleus | cellular_component:cytosol | biological_process:apoptotic process | biological_process:negative regulation of cell proliferation | biological_process:regulation of growth rate | molecular_function:identical protein binding
91653	NM_033254	BOC	48993	49755	69024	203591	234966	231628	1.21614	1.21614	6.35904	0.0811415	0.0986796	-0.0986796	BOC cell adhesion associated, oncogene regulated	molecular_function:protein binding | cellular_component:plasma membrane | biological_process:cell adhesion | cellular_component:integral component of membrane | biological_process:muscle cell differentiation | biological_process:positive regulation of myoblast differentiation | biological_process:positive regulation of muscle cell differentiation | biological_process:smoothened signaling pathway …
552900	NM_001031827	BOLA2	120738	114042	124219	234532	219077	223091	1.04116	1.04116	30.6466	0.162305	0.168986	-0.168986	bolA-like protein 2-like	cellular_component:extracellular vesicular exosome
66037	NM_197970	BOLL	219903	197753	187432	261264	265726	264228	2.10559	2.10559	0	0.00211447	0.00445219	-0.00445219	boule-like RNA-binding protein	molecular_function:nucleotide binding | molecular_function:nucleic acid binding | molecular_function:RNA binding | molecular_function:protein binding | cellular_component:cytoplasm | biological_process:meiotic nuclear division | biological_process:multicellular organismal development | biological_process:spermatogenesis | molecular_function:translation activator activity | biological_process:cell…
669	NM_001724	BPGM	183047	103314	101773	254938	260627	278065	1.11974	1.11974	11.095	0.060327	0.0675507	-0.0675507	2,3-bisphosphoglycerate mutase	molecular_function:phosphoglycerate mutase activity | biological_process:glycolytic process | molecular_function:bisphosphoglycerate mutase activity | molecular_function:bisphosphoglycerate 2-phosphatase activity | biological_process:carbohydrate metabolic process | biological_process:respiratory gaseous exchange | biological_process:dephosphorylation | molecular_function:intramolecular transfera…
671	NM_001725	BPI	283430	89952	85407	264638	247371	240779	1.79136	1.79136	0.443512	0.0608569	0.109016	-0.109016	uncharacterized LOC149684	molecular_function:lipopolysaccharide binding | cellular_component:integral component of plasma membrane | biological_process:negative regulation of interleukin-6 production | biological_process:negative regulation of interleukin-8 production | biological_process:negative regulation of tumor necrosis factor production | biological_process:negative regulation of macrophage activation | cellular_co…
128859	NM_174897	BPIL3	38123	39492	38443	229223	225935	197194	1.19521	1.19521	6.35904	0.0535056	0.0639505	-0.0639505	BPI fold containing family B, member 6	cellular_component:extracellular region | molecular_function:lipid binding
10380	NM_006085	BPNT1	62861	53323	50785	222223	218234	234800	1.13189	1.13189	11.095	0.0789562	0.0893695	-0.0893695	3'(2'), 5'-bisphosphate nucleotidase 1	biological_process:phosphatidylinositol phosphorylation | cellular_component:cytosol | biological_process:nucleobase-containing compound metabolic process | biological_process:xenobiotic metabolic process | biological_process:nervous system development | molecular_function:3'(2'),5'-bisphosphate nucleotidase activity | molecular_function:3'(2'),5'-bisphosphate nucleotidase activity | molecular_fu…
55201	NM_018174	BPY2IP1	41357	39414	47676	175579	171479	174851	1.04328	1.04328	30.6466	0.189114	0.197299	-0.197299	microtubule-associated protein 1S	biological_process:microtubule cytoskeleton organization | molecular_function:microtubule binding | biological_process:microtubule bundle formation | molecular_function:DNA binding | molecular_function:protein binding | cellular_component:nucleus | cellular_component:nucleolus | cellular_component:cytoplasm | cellular_component:spindle | cellular_component:cytosol | biological_process:apoptotic D…
8315	NM_006768	BRAP	13143	15441	16450	235033	265741	250267	1.06306	1.06306	30.6466	0.192387	0.204519	-0.204519	BRCA1 associated protein	molecular_function:nucleotide binding | molecular_function:zinc ion binding | cellular_component:ubiquitin ligase complex | biological_process:MAPK cascade | molecular_function:ubiquitin-protein transferase activity | molecular_function:protein binding | cellular_component:cytoplasm | biological_process:Ras protein signal transduction | molecular_function:nuclear localization sequence binding | b…
672	NM_007298	BRCA1	16887	26347	19937	182009	192549	202133	1.7823	1.7823	0	0.00032552	0.000580174	-0.000580174	breast cancer 1, early onset	molecular_function:ubiquitin-protein transferase activity | biological_process:DNA repair | molecular_function:zinc ion binding | biological_process:protein ubiquitination | molecular_function:DNA binding | cellular_component:nucleus | cellular_component:cytoplasm | cellular_component:plasma membrane | cellular_component:ubiquitin ligase complex | biological_process:double-strand break repair via…
8019	NM_007371	BRD3	163216	130951	126903	290938	271599	276444	1.12738	1.12738	2.9389	0.000914302	0.00103076	-0.00103076	bromodomain containing 3	molecular_function:chromatin binding | molecular_function:protein binding | cellular_component:nucleus | biological_process:transcription, DNA-templated | biological_process:regulation of transcription from RNA polymerase II promoter | biological_process:chromatin modification | molecular_function:lysine-acetylated histone binding
23476	NM_014299	BRD4	147966	124270	114248	242729	173448	207427	2.15692	2.15692	0	0.00336151	0.00725051	-0.00725051	bromodomain containing 4	biological_process:regulation of transcription involved in G1/S transition of mitotic cell cycle | cellular_component:condensed nuclear chromosome | molecular_function:p53 binding | molecular_function:chromatin binding | molecular_function:protein binding | cellular_component:nucleus | cellular_component:cytoplasm | biological_process:chromatin remodeling | biological_process:transcription, DNA-t…
29117	NM_013263	BRD7	144439	115082	113675	212593	210579	200081	1.16854	1.16854	6.35904	0.0443763	0.0518553	-0.0518553	bromodomain containing 7	molecular_function:p53 binding | molecular_function:transcription coactivator activity | molecular_function:transcription corepressor activity | molecular_function:protein binding | cellular_component:nucleus | cellular_component:cytoplasm | biological_process:transcription, DNA-templated | biological_process:regulation of transcription from RNA polymerase II promoter | biological_process:cell cy…
10902	NM_006696	BRD8	55836	53158	61822	222358	217674	230333	5.3686	5.3686	0	3.84e-05	0.000206154	-0.000206154	bromodomain containing 8	cellular_component:Swr1 complex | molecular_function:sequence-specific DNA binding transcription factor activity | molecular_function:thyroid hormone receptor activity | cellular_component:nucleus | cellular_component:nucleoplasm | cellular_component:mitochondrion | biological_process:chromatin organization | biological_process:transcription, DNA-templated | biological_process:regulation of trans…
65980	NM_001009877	BRD9	185768	183914	151470	260851	259401	268102	1.16114	1.16114	1.21626	0.00127607	0.0014817	-0.0014817	bromodomain containing 9	molecular_function:nucleic acid binding | cellular_component:cellular_component | biological_process:transcription, DNA-templated | biological_process:regulation of transcription, DNA-templated | biological_process:chromatin modification | molecular_function:lysine-acetylated histone binding | molecular_function:protein binding
26228	NM_012108	BRDG1	198384	181674	167344	253078	255716	250377	1.17604	1.17604	1.21626	0.00491742	0.0057831	-0.0057831	signal transducing adaptor family member 1	molecular_function:protein binding | cellular_component:nucleus | cellular_component:cytoplasm | cellular_component:mitochondrion | biological_process:intracellular protein transport | biological_process:signal transduction | cellular_component:protein complex | biological_process:membrane fusion | molecular_function:SH3/SH2 adaptor activity | biological_process:positive regulation of signal tran…
676	NM_001726	BRDT	85065	94255	76051	263056	246084	256594	1.15263	1.15263	11.095	0.0789573	0.0910082	-0.0910082	bromodomain, testis-specific	biological_process:histone displacement | molecular_function:transcription coactivator activity | cellular_component:nucleus | biological_process:chromatin remodeling | biological_process:transcription, DNA-templated | biological_process:mRNA processing | biological_process:male meiosis | biological_process:male meiosis I | biological_process:spermatogenesis | biological_process:RNA splicing | bi…
9577	NM_199191	BRE	127203	122808	123860	211397	195193	190941	1.43303	1.43303	0.137128	0.017952	0.0257257	-0.0257257	brain and reproductive organ-expressed (TNFRSF1A modulator)	cellular_component:nuclear ubiquitin ligase complex | molecular_function:peroxisome targeting sequence binding | molecular_function:tumor necrosis factor receptor binding | molecular_function:protein binding | cellular_component:nucleus | cellular_component:cytoplasm | biological_process:double-strand break repair | biological_process:apoptotic process | biological_process:cellular response to DN…
2972	NM_145685	BRF1	22519	14855	22461	240267	227078	244486	1.77637	1.77637	0	0.00497352	0.00883483	-0.00883483	BRF1, RNA polymerase III transcription initiation factor 90 kDa subunit	cellular_component:nucleus | biological_process:DNA-templated transcription, initiation | molecular_function:zinc ion binding | biological_process:positive regulation of transcription, DNA-templated | molecular_function:TBP-class protein binding | cellular_component:transcription factor TFIIIB complex | cellular_component:nucleoplasm | biological_process:transcription from RNA polymerase III prom…
55290	NM_018310	BRF2	92956	124247	119589	238999	225944	214016	1.87743	1.87743	0	0.000946987	0.0017779	-0.0017779	BRF2, RNA polymerase III transcription initiation factor 50 kDa subunit	cellular_component:nucleoplasm | biological_process:DNA-templated transcription, initiation | biological_process:regulation of transcription, DNA-templated | biological_process:transcription from RNA polymerase III promoter | molecular_function:zinc ion binding | biological_process:gene expression
25798	NM_015379	BRI3	271590	272673	267138	263407	262754	271144	1.06803	1.06803	16.2507	0.000374852	0.000400354	-0.000400354	brain protein I3	cellular_component:integral component of membrane | molecular_function:identical protein binding
83990	NM_032043	BRIP1	29830	28122	32342	245222	238562	224341	1.43218	1.43218	1.21626	0.0523203	0.0749323	-0.0749323	BRCA1 interacting protein C-terminal helicase 1	biological_process:metabolic process | molecular_function:hydrolase activity, acting on acid anhydrides | biological_process:DNA damage checkpoint | molecular_function:DNA binding | molecular_function:ATP-dependent DNA helicase activity | molecular_function:protein binding | molecular_function:ATP binding | cellular_component:nucleus | cellular_component:cytoplasm | biological_process:ATP catabol…
254065	NM_153252	BRODL	77227	56601	60385	173020	184579	183365	1.35721	1.35721	0.443512	0.0342345	0.0464633	-0.0464633	bromodomain and WD repeat domain containing 3	biological_process:cytoskeleton organization | biological_process:regulation of cell shape | molecular_function:protein binding
51660	NM_016098	BRP44L	76343	65715	50089	276468	272303	268579	1.05931	1.05931	30.6466	0.18878	0.199976	-0.199976	mitochondrial pyruvate carrier 1	molecular_function:molecular_function | cellular_component:cellular_component | cellular_component:mitochondrion | cellular_component:mitochondrial inner membrane | biological_process:pyruvate metabolic process | cellular_component:integral component of membrane | biological_process:cellular metabolic process | biological_process:small molecule metabolic process | biological_process:mitochondrial…
7862	NM_004634	BRPF1	74681	77673	75566	204897	186235	196113	2.88086	2.88086	0	0.00144208	0.00415442	-0.00415442	bromodomain and PHD finger containing, 1	molecular_function:metal ion binding | molecular_function:DNA binding | cellular_component:nucleus | cellular_component:nucleoplasm | cellular_component:cytoplasm | biological_process:chromatin organization | biological_process:transcription, DNA-templated | molecular_function:zinc ion binding | biological_process:histone H3 acetylation | biological_process:positive regulation of transcription, D…
27154	NM_015695	BRPF3	17130	19715	16597	239492	262652	265138	1.14966	1.14966	11.095	0.0824051	0.0947379	-0.0947379	bromodomain and PHD finger containing, 3	biological_process:platelet degranulation | molecular_function:protein binding | cellular_component:extracellular region | cellular_component:cytosol | biological_process:blood coagulation | molecular_function:zinc ion binding | biological_process:platelet activation | biological_process:histone H3 acetylation | cellular_component:MOZ/MORF histone acetyltransferase complex
680	NM_001727	BRS3	26381	24874	29123	209827	212206	228925	1.36598	1.36598	0.00681625	0.00160687	0.00219495	-0.00219495	bombesin-like receptor 3	molecular_function:bombesin receptor activity | cellular_component:plasma membrane | biological_process:glucose metabolic process | biological_process:regulation of blood pressure | biological_process:adult feeding behavior | cellular_component:integral component of membrane | biological_process:bombesin receptor signaling pathway | molecular_function:G-protein coupled receptor activity | biologi…
60680	NM_021938	BRUNOL5	162431	127834	207049	226454	196750	205942	1.05333	1.05333	30.6466	0.200849	0.21156	-0.21156	CUGBP, Elav-like family member 5	molecular_function:nucleotide binding | molecular_function:RNA binding | cellular_component:nucleus | cellular_component:cytoplasm | biological_process:mRNA processing | molecular_function:nucleic acid binding
26580	NM_032667	BSCL2	115731	111477	106313	191839	202571	196371	1.02097	1.02097	33.6721	0.171092	0.17468	-0.17468	Berardinelli-Seip congenital lipodystrophy 2 (seipin)	molecular_function:molecular_function | biological_process:cell death | biological_process:lipid catabolic process | biological_process:lipid storage | cellular_component:integral component of endoplasmic reticulum membrane | biological_process:lipid particle organization | biological_process:fat cell differentiation | biological_process:negative regulation of lipid catabolic process
683	NM_004334	BST1	7761	7393	6059	165547	156788	128455	1.37268	1.37268	0.00681625	0.0034625	0.00475291	-0.00475291	bone marrow stromal cell antigen 1	molecular_function:NAD+ nucleosidase activity | molecular_function:NAD+ nucleosidase activity | molecular_function:NAD+ nucleosidase activity | molecular_function:NAD+ nucleosidase activity | molecular_function:NAD+ nucleosidase activity | molecular_function:NAD+ nucleosidase activity | molecular_function:NAD+ nucleosidase activity | molecular_function:NAD+ nucleosidase activity | molecular_funct…
684	NM_004335	BST2	125950	113722	118817	267502	262961	271877	1.90006	1.90006	0	0.00417522	0.00793316	-0.00793316	bone marrow stromal cell antigen 2	biological_process:negative regulation of plasmacytoid dendritic cell cytokine production | molecular_function:signal transducer activity | molecular_function:protein binding | cellular_component:cytoplasm | cellular_component:late endosome | cellular_component:Golgi apparatus | cellular_component:plasma membrane | cellular_component:integral component of plasma membrane | biological_process:humo…
9044	NM_003972	BTAF1	88436	76567	72803	201423	202472	203581	1.79555	1.79555	0	0.00307282	0.0055174	-0.0055174	BTAF1 RNA polymerase II, B-TFIID transcription factor-associated, 170kDa	molecular_function:DNA binding | molecular_function:helicase activity | molecular_function:ATP binding | biological_process:metabolic process | molecular_function:sequence-specific DNA binding transcription factor activity | cellular_component:nucleus | biological_process:negative regulation of chromatin binding | biological_process:negative regulation of transcription, DNA-templated | molecular_…
54813	NM_017658	BTBD5	111428	135415	113701	236105	226767	219811	2.00352	2.00352	0	0.00056527	0.00113253	-0.00113253	kelch-like family member 28	molecular_function:protein binding
114781	NM_152733	BTBD9	94439	101554	102500	252423	246654	253286	1.9089	1.9089	0	0.00383498	0.0073206	-0.0073206	BTB (POZ) domain containing 9	biological_process:cell adhesion | molecular_function:protein binding | biological_process:adult locomotory behavior | biological_process:long-term memory | biological_process:serotonin metabolic process | biological_process:multicellular organismal iron ion homeostasis | biological_process:circadian behavior | biological_process:circadian sleep/wake cycle, non-REM sleep | biological_process:sens…
687	NM_001206	BTEB1	76636	74491	83179	175660	158558	175415	2.65694	2.65694	0	0.000111746	0.000296903	-0.000296903	Kruppel-like factor 9	molecular_function:DNA binding | molecular_function:sequence-specific DNA binding transcription factor activity | cellular_component:nucleus | cellular_component:cytoplasm | cellular_component:plasma membrane | biological_process:transcription, DNA-templated | biological_process:regulation of transcription from RNA polymerase II promoter | molecular_function:metal ion binding | biological_process…
689	NM_001207	BTF3	72522	78958	81681	169125	191760	169623	2.01701	2.01701	0	0.000215565	0.000434796	-0.000434796	basic transcription factor 3	molecular_function:protein binding | cellular_component:nucleus | cellular_component:cytoplasm | biological_process:regulation of transcription, DNA-templated | biological_process:transcription from RNA polymerase II promoter | biological_process:protein transport | molecular_function:poly(A) RNA binding | molecular_function:poly(A) RNA binding | molecular_function:poly(A) RNA binding | molecular…
694	NM_001731	BTG1	197438	94245	90596	235564	229242	222360	1.12353	1.12353	11.095	0.033627	0.037781	-0.037781	B-cell translocation gene 1, anti-proliferative	molecular_function:transcription cofactor activity | molecular_function:protein binding | cellular_component:nucleus | cellular_component:cytoplasm | biological_process:regulation of transcription, DNA-templated | biological_process:negative regulation of cell proliferation | biological_process:cell migration | molecular_function:enzyme binding | molecular_function:kinase binding | biological_pro…
10950	NM_006806	BTG3	69509	66280	59867	282133	264309	246715	1.06701	1.06701	26.6081	0.13329	0.142222	-0.142222	BTG family, member 3	molecular_function:protein binding | cellular_component:cytoplasm | biological_process:negative regulation of cell proliferation | biological_process:negative regulation of mitotic cell cycle
696	NM_001732	BTN1A1	14767	16683	13113	238483	219727	230196	1.24091	1.24091	2.9389	0.0370102	0.0459263	-0.0459263	butyrophilin, subfamily 1, member A1	molecular_function:receptor activity | cellular_component:extracellular space | cellular_component:integral component of plasma membrane | molecular_function:protein binding
11120	NM_007049	BTN2A1	50985	54243	56950	193789	206466	200842	2.04633	2.04633	0	0.00112141	0.00229478	-0.00229478	butyrophilin, subfamily 2, member A1	molecular_function:protein binding | cellular_component:integral component of plasma membrane | biological_process:lipid metabolic process | cellular_component:extracellular vesicular exosome
54718	NM_024018	BTN2A3	74095	77164	93060	229181	236038	254724	1.52278	1.52278	0	0.00286996	0.00437031	-0.00437031	butyrophilin, subfamily 2, member A3, pseudogene
56244	NM_019602	BTNL2	80844	78225	104721	268096	265172	276096	1.78824	1.78824	0	0.000811226	0.00145067	-0.00145067	butyrophilin-like 2 (MHC class II associated)	cellular_component:integral component of membrane | molecular_function:protein binding | molecular_function:receptor binding | biological_process:negative regulation of T cell receptor signaling pathway | biological_process:positive regulation of T cell proliferation | biological_process:positive regulation of interleukin-2 secretion
10917	NM_197975	BTNL3	42980	44062	48461	234450	229503	236362	1.21851	1.21851	2.9389	0.0502146	0.0611868	-0.0611868	butyrophilin-like 3	molecular_function:molecular_function | cellular_component:cellular_component | biological_process:biological_process | cellular_component:integral component of membrane | molecular_function:protein binding
699	NM_004336	BUB1	235701	242377	232156	300880	298246	300167	1.69033	1.69033	0	4.56e-05	7.7079e-05	-7.7079e-05	BUB1 mitotic checkpoint serine/threonine kinase	biological_process:mitotic cell cycle | cellular_component:kinetochore | cellular_component:condensed chromosome kinetochore | molecular_function:protein kinase activity | molecular_function:protein serine/threonine kinase activity | molecular_function:protein binding | molecular_function:ATP binding | cellular_component:nucleus | cellular_component:cytoplasm | cellular_component:cytosol | biolog…
116285	NM_052956	BUCS1	21275	22438	21031	213229	239784	232878	1.42995	1.42995	0	0.00200976	0.00287385	-0.00287385	acyl-CoA synthetase medium-chain family member 1	molecular_function:acyl-CoA ligase activity | molecular_function:ATP binding | molecular_function:GTP binding | cellular_component:mitochondrial matrix | biological_process:xenobiotic metabolic process | biological_process:energy derivation by oxidation of organic compounds | biological_process:benzoate metabolic process | biological_process:fatty acid oxidation | biological_process:butyrate meta…
11149	NM_007073	BVES	253012	246339	238757	299438	296902	305761	1.33741	1.33741	0	0.000244585	0.000327111	-0.000327111	blood vessel epicardial substance	biological_process:positive regulation of receptor recycling | molecular_function:structural molecule activity | cellular_component:plasma membrane | cellular_component:tight junction | biological_process:muscle organ development | biological_process:regulation of cell shape | cellular_component:integral component of membrane | biological_process:vesicle-mediated transport | cellular_component:la…
705	NM_004053	BYSL	66628	64968	55473	220522	209468	216818	1.09667	1.09667	16.2507	0.0386536	0.0423901	-0.0423901	bystin-like	molecular_function:protein binding | cellular_component:nucleus | cellular_component:nucleolus | cellular_component:cytoplasm | biological_process:cell adhesion | biological_process:female pregnancy | cellular_component:membrane | cellular_component:intracellular membrane-bounded organelle | molecular_function:poly(A) RNA binding | molecular_function:poly(A) RNA binding | molecular_function:poly(…
222642	NM_001010873	BZRPL1	190773	174856	129036	259844	266633	251003	1.21517	1.21517	2.9389	0.0463221	0.0562892	-0.0562892	translocator protein 2	cellular_component:endoplasmic reticulum | cellular_component:endoplasmic reticulum membrane | biological_process:transport | molecular_function:cholesterol binding | cellular_component:integral component of membrane
9689	NM_014670	BZW1	39233	30004	37144	167021	180247	176790	1.35244	1.35244	0.443512	0.0257152	0.0347781	-0.0347781	basic leucine zipper and W2 domains 1	cellular_component:cytoplasm | biological_process:transcription, DNA-templated | biological_process:regulation of transcription, DNA-templated | cellular_component:membrane | molecular_function:poly(A) RNA binding | molecular_function:poly(A) RNA binding | molecular_function:poly(A) RNA binding | molecular_function:poly(A) RNA binding | molecular_function:poly(A) RNA binding | molecular_function:…
28969	NM_014038	BZW2	46078	44699	43842	193000	198981	184287	1.39198	1.39198	0.137128	0.0246882	0.0343654	-0.0343654	basic leucine zipper and W2 domains 2	molecular_function:protein binding | biological_process:nervous system development | cellular_component:membrane | biological_process:cell differentiation
83938	NM_032024	C10ORF11	102086	76037	64397	251251	241583	250679	1.32116	1.32116	0.443512	0.0159137	0.0210245	-0.0210245	chromosome 10 open reading frame 11	biological_process:melanocyte differentiation
64318	NM_022451	C10ORF117	182320	180176	156876	248534	222881	218598	1.11589	1.11589	11.095	0.0586514	0.0654483	-0.0654483	nucleolar complex associated 3 homolog (S. cerevisiae)	cellular_component:nucleolus | cellular_component:nuclear speck | molecular_function:poly(A) RNA binding | molecular_function:poly(A) RNA binding | molecular_function:poly(A) RNA binding | molecular_function:poly(A) RNA binding | molecular_function:poly(A) RNA binding | molecular_function:poly(A) RNA binding | molecular_function:poly(A) RNA binding | molecular_function:poly(A) RNA binding | molec…
79892	NM_024834	C10ORF119	162531	159249	119334	220428	219669	219189	1.1849	1.1849	2.9389	0.0327631	0.0388208	-0.0388208	minichromosome maintenance complex binding protein	biological_process:mitotic S phase | molecular_function:chromatin binding | molecular_function:protein binding | cellular_component:nucleus | cellular_component:cytoplasm | cellular_component:plasma membrane | biological_process:DNA-dependent DNA replication | biological_process:sister chromatid cohesion | biological_process:mitotic nuclear division | cellular_component:MCM complex
142827	NM_207321	C10ORF129	70598	68461	47082	220426	222907	218085	1.0532	1.0532	30.6466	0.172635	0.181819	-0.181819	acyl-CoA synthetase medium-chain family member 6	molecular_function:catalytic activity | biological_process:metabolic process | molecular_function:ATP binding | molecular_function:GTP binding | cellular_component:mitochondrion | biological_process:fatty acid metabolic process | molecular_function:metal ion binding | molecular_function:butyrate-CoA ligase activity
26098	NM_015608	C10ORF137	112926	126407	185161	244697	257979	266621	1.21014	1.21014	2.9389	0.0390318	0.0472339	-0.0472339	erythroid differentiation regulatory factor 1	cellular_component:nucleus | biological_process:transcription, DNA-templated | biological_process:regulation of transcription, DNA-templated
220979	NM_001039380	C10ORF25	112861	104084	79580	243846	253588	262219	1.17	1.17	11.095	0.0973088	0.113851	-0.113851	chromosome 10 open reading frame 25	cellular_component:extracellular region
219793	NM_152710	C10ORF27	39101	40745	47251	240024	238070	242068	1.04202	1.04202	30.6466	0.127998	0.133376	-0.133376	thymus, brain and testes associated	cellular_component:cytosol | biological_process:multicellular organismal development | biological_process:spermatogenesis | biological_process:cell differentiation | molecular_function:protein binding | cellular_component:nucleus
119032	NM_144591	C10ORF32	108167	87216	85829	242518	248622	253723	1.1824	1.1824	6.35904	0.0489481	0.0578764	-0.0578764	chromosome 10 open reading frame 32
219738	NM_145306	C10ORF35	118117	111019	109649	244651	225936	246127	2.07866	2.07866	0	0.00173579	0.00360812	-0.00360812	chromosome 10 open reading frame 35	cellular_component:integral component of membrane | molecular_function:protein binding
118924	NM_145246	C10ORF4	92002	86896	92397	260224	178881	271044	1.14654	1.14654	16.2507	0.117529	0.134752	-0.134752	fragile site, folic acid type, rare, fra(10)(q23.3) or fra(10)(q24.2) candidate 1	molecular_function:protein binding | cellular_component:nucleus
[truncated: 8,538 more rows]

## Sheet: Necrosis Inhibitors
Gene ID	Gene Accession	Gene Symbol	Drug 1	Drug 2	Drug 3	Control 4	Control 5	Control 6	Signed fold change	SAM Ratio	SAM q	ttest q	signed fold change X ttest q	SAM Ratio X ttest q	Description	GO Terms
[truncated: 8,854 more rows]
